# Supplementary material for: LncRNAs as new biomarkers to differentiate triple negative breast cancer from non-triple negative breast cancer
Source: PubMed Central journal article supplement (PMC4914340; doi:10.18632/oncotarget.7509), 2016-02-19
Supplement: oncotarget-07-13047-s001.pdf [file oncotarget-07-13047-s001.pdf]

#Column "GO.ID" stands for the ID of gene ontology term  
 #Column "Term" stands for the name of gene ontology term  
 #Column "Ontology" stands for the ontology of GOID belongs to  
 #Column "Count" stands for the number of DE genes associated with the listed GOID  
 #Column "Pop.Hits" stands for the number of background population genes associated with the listed GOID  
 #Column "List.Total" stands for the total number of DE genes  
 #Column "Pop.Total" stands for the total number of background population genes  
 #Column "Fold.Enrichment" stands for the Fold Enrichment value of the GOID, it equals (Count/Pop.Hits)  
 #Column "Pvalue" stands for the significance testing value of the GOID  
 #Column "FDR" stands for the false discovery rate of the GOID, using Benjamini & Hochberg (1995) method  
 #Column "Enrichment.Score" stands for the Enrichment Score value of the GOID, it equals (-log10(Pvalue))  
 #Column "GENES" stands for the DE genes associated with the GOID

| GO.ID     | Term       | Ontology           | Count      | Pop.Hits          | List.Total                        | Pop.Total              | Fold.Enrichment | Pvalue | FDR | Enrichment.Score | GENES |
|-----------|------------|--------------------|------------|-------------------|-----------------------------------|------------------------|-----------------|--------|-----|------------------|-------|
| GO:000027 | cell cycle | Biological process | 81659570   | 145863.145291911  | 1.34528E-204.92641E-1719.87118784 | PRC                    |                 |        |     |                  |       |
| GO:002241 | cell cycle | Biological process | 95882570   | 145862.7562358285 | 2.21054E-209.54049E-1719.28311756 | PRC                    |                 |        |     |                  |       |
| GO:000704 | cell cycle | Biological process | 1121167570 | 145862.4558877911 | 1.24672E-191.52182E-1618.90423271 | PRC1//KIF23            |                 |        |     |                  |       |
| GO:002241 | cell cycle | Biological process | 84730570   | 145862.9445421771 | 1.67752E-191.53577E-1618.77533291 | PRC                    |                 |        |     |                  |       |
| GO:000027 | cell cycle | Biological process | 56460570   | 145863.1152402752 | 8.2708E-142.07055E-1113.54866224  | PRC1//KIF23//N         |                 |        |     |                  |       |
| GO:005172 | cell cycle | Biological process | 62584570   | 145862.7166906995 | 7.6313E-133.51743E-1012.23        |                        |                 |        |     |                  |       |
| GO:001056 | cell cycle | Biological process | 44331570   | 145863.4016218799 | 2.2015E-134.68159                 |                        |                 |        |     |                  |       |
| GO:000008 | cell cycle | Biological process | 44332570   | 145863.391376031  | 1.02274E                          |                        |                 |        |     |                  |       |
| GO:005131 | cell cycle | Biological process | 47375570   | 145863.2072140351 | 3.30843E-125.32384E-1011.88325098 | NUSAP1//KIF21          |                 |        |     |                  |       |
| GO:000734 | cell cycle | Biological process | 37254570   | 145863.7276004974 | 0.05864E-121.4862                 |                        |                 |        |     |                  |       |
| GO:000028 | cell cycle | Biological process | 42321570   | 145863.3481554355 | 2.24653E-121.60107E-0911.28012769 | NDC80//ZWINT           |                 |        |     |                  |       |
| GO:000706 | cell cycle | Biological process | 42321570   | 145863.3481554355 | 2.24653E-121.60107E-0911.28012769 | NDC80//ZWINT//MAD2L1// |                 |        |     |                  |       |
| GO:000007 | cell cycle | Biological process | 33214570   | 145863.9460403341 | 1.25739E-113.54197E-0910.90053016 | H2A                    |                 |        |     |                  |       |
| GO:004828 | cell cycle | Biological process | 42333570   | 145863.2275011851 | 1.75722E-114.59639E-0910.7551735  | NDC80//ZWINT//         |                 |        |     |                  |       |
| GO:007115 | cell cycle | Biological process | 33223570   | 145863.7867831013 | 9.3265E-119.3965                  |                        |                 |        |     |                  |       |
| GO:000709 | cell cycle | Biological process | 41328570   | 145863.1986842114 | 1.10554E-119.39655E-0910.38662995 | UBE                    |                 |        |     |                  |       |
| GO:000709 | cell cycle | Biological process | 24126570   | 145864.8741854649 | 4.48713E-112.04364E-0810.02       |                        |                 |        |     |                  |       |
| GO:004578 | cell cycle | Biological process | 44384570   | 145862.9321271931 | 1.40755E-102.8635                 |                        |                 |        |     |                  |       |
| GO:003114 | cell cycle | Biological process | 1882570    | 145865.61720154   |                                   |                        |                 |        |     |                  |       |
| GO:000709 | cell cycle | Biological process | 21114570   | 145864.7138504162 | 6.9319E-094.93122E-078.56973355   | 1NDC80//ZWINT          |                 |        |     |                  |       |
| GO:009006 | cell cycle | Biological process | 19105570   | 145864.630476192  | 0.09047E                          |                        |                 |        |     |                  |       |
| GO:005134 | cell cycle | Biological process | 1895570    | 145864.8485318562 | 3.32979E-083.87804E-067.6326      |                        |                 |        |     |                  |       |
| GO:005132 | cell cycle | Biological process | 36331570   | 145862.7831451742 | 7.7665E-084.40475                 |                        |                 |        |     |                  |       |
| GO:000023 | cell cycle | Biological process | 1786570    | 145865.0583843332 | 9.95546E-084.50954E-067.529374834 | NDC80//CENPA           |                 |        |     |                  |       |
| GO:004426 | cell cycle | Biological process | 48527570   | 145862.3307300514 | 1.18114E-086.12453E-067.378       |                        |                 |        |     |                  |       |
| GO:005132 | cell cycle | Biological process | 36339570   | 145862.7174662325 | 1.11542E-087.20487E-067.291118969 | CDKN3//ORC6//INHBA//PC |                 |        |     |                  |       |
| GO:000008 | cell cycle | Biological process | 24172570   | 145863.5706242355 | 9.95508                           |                        |                 |        |     |                  |       |
| GO:000699 | cell cycle | Biological process | 1071648570 | 145861.6614524786 | 1.15612E-088.05132E-067.210693148 | PRC1//KIF23            |                 |        |     |                  |       |
| GO:005143 | cell cycle | Biological process | 1791570    | 145864.7804511287 | 1.11493E-088.98443                |                        |                 |        |     |                  |       |
| GO:005133 | cell cycle | Biological process | 1682570    | 145864.9930680369 | 1.13925E-081.1156E                |                        |                 |        |     |                  |       |
| GO:007184 | cell cycle | Biological process | 1522632570 | 145861.477811551  | 2.2841                            |                        |                 |        |     |                  |       |
| GO:007184 | cell cycle | Biological process | 1562722570 | 145861            |                                   |                        |                 |        |     |                  |       |
| GO:000709 | cell cycle | Biological process | 1355570    | 145866.0484210531 | 1.38715E-071.53166E-056.857878083 | PRC1//KIF23//N         |                 |        |     |                  |       |
| GO:001656 | cell cycle | Biological process | 36353570   | 145862.6096913671 | 4.42207E-071.53166E-056.847078259 | FBXW11//UBR            |                 |        |     |                  |       |
| GO:000023 | cell cycle | Biological process | 25195570   | 145863.2807017541 | 7.70412E-071.783E-056.76849887    | PRC1//                 |                 |        |     |                  |       |
| GO:003244 | cell cycle | Biological process | 37375570   | 145862.524828072  | 2.20163E                          |                        |                 |        |     |                  |       |
| GO:007064 | cell cycle | Biological process | 40424570   | 14586             |                                   |                        |                 |        |     |                  |       |

GO:005144: of ubiquitin-protein ligase activity involved in mitotic cell cycleBiological  
 GO:004316: ubiquitin-dependent protein catabolic processBiological process24185570145863.3197155052.40684E-072.2599  
 GO:005144: regulation of ubiquitin-protein ligase activityBiological process1578570145864.9210526322.8175E-1  
 GO:001045: protein catabolic processBiological process24189570145863.2494569763.59608E-073.21192E-056.444  
 GO:001994: protein catabolic processBiological process34340570145862.5589473685.03494E-074.23682E-056.298  
 GO:004363: macromolecular catabolic processBiological process34340570145862.5589473685.03494E-074.23682E-056.298  
 GO:005144: regulation of ubiquitin-protein ligase activity involved in mitotic cell  
 GO:000657: protein catabolic processBiological process33334570145862.5283012929.73479E-077.82596E-056.011  
 GO:005160: involved in cellular protein catabolic processBiological process34350570145862.485834E-077.82596E-056.011  
 GO:000703: spindle organizationBiological process822570145869.3052631581.01929E-067.94179E-055.99170225PRC1//  
 GO:005127: organizationBiological process49610570145862.0555478861.33294E-060.0001016925.87519036NDC80//ZWINT,  
 GO:004422: protein catabolic processBiological process34356570145862.4439384981.44705E-060.0001081455.839  
 GO:000903: catabolic processBiological process51649570145862.010883141.53688E-060.0001125615.813359983DCP  
 GO:003135: of protein ubiquitinationBiological process19142570145863.4239436622.70206E-060.0001940185.568  
 GO:001604: component organizationBiological process1773336570145861.3577148812.77911E-060.0001957135.556094531F  
 GO:000697: damage response, signal transduction by p53 class mediator resulting  
 GO:007235: transduction involved in cell cycle checkpoint process1261570145865.0339948E-060.0001957135.556094531F  
 GO:007240: transduction involved in DNA integrity checkpoint process1261570145865.0339948E-060.0001957135.556094531F  
 GO:007240: transduction involved in G1/S transition checkpoint process1261570145865.0339948E-060.0001957135.556094531F  
 GO:007240: transduction involved in mitotic cell cycle checkpoint process1261570145865.0339948E-060.0001957135.556094531F  
 GO:007242: transduction involved in DNA damage checkpoint process1261570145865.0339948E-060.0001957135.556094531F  
 GO:007243: transduction involved in mitotic cell cycle G1/S transition DNA  
 GO:007247: transduction involved in mitotic cell cycle G1/S checkpoint process1261570145865.0339948E-060.0001957135.556094531F  
 GO:007184: component organization or biogenesis process1813442570145861.3456405393.61529E-060.0001957135.556094531F  
 GO:003135: regulation of protein ubiquitinationBiological process16108570145863.7910331384.34971E-060.0002  
 GO:007115: regulation of cell cycle arrestBiological process1265570145864.7242105266.84325E  
 GO:003157: checkpoint process936570145866.3973684217.29679E-060.0004175135.136868017CENPF//UBE2C//  
 GO:003016: catabolic processBiological process36418570145862.2038781167.7279E-060.0004353785.111938364ISG1  
 GO:007182: complex subunit organizationBiological process17126570145863.4525480378.03955E-060.0004460735.094  
 GO:000707: processBiological process29303570145862.4491575478.24898E-060.0004508625.083599923PRC1//KIF23//  
 GO:003157: cell cycle G1/S transition checkpoint process1378570145864.2649122819.24194E  
 GO:007177: transition checkpoint process1378570145864.2649122819.24194E-060.0004904935.034236862PSM  
 GO:005144: regulation of ubiquitin-protein ligase activity involved in mitotic cell  
 GO:000027: transition of mitotic cell cycleBiological process1379570145864.2109260491.06737E  
 GO:004422: catabolic processBiological process831329570145861.5981386881.09034E-050.0005545614.962436863W  
 GO:003157: cell cycle G1/S transition DNA damage checkpoint process1268570145865.0339948E-060.0001957135.556094531F  
 GO:007110: conformational changeBiological process19157570145863.0968152871.19716E-050.000592434.921849564CEN  
 GO:000697: transportBiological process26262570145862.5394134191.27573E-050.0006228954.894242463RPS15//IFNG//  
 GO:200004: of G1/S transition of mitotic cell cycleBiological process1381570145864.2649122819.24194E  
 GO:005116: transportBiological process26264570145862.5201754391.45957E-050.0006941514.835773704RPS15//IFNG//  
 GO:000703: of mitosisBiological process1382570145864.0568677791.62067E-050.000751254.79030664CENPF  
 GO:005178: of nuclear divisionBiological process1382570145864.0568677791.62067E-050.000751254.79030664CENPF  
 GO:006500: complex assemblyBiological process16120570145863.4119298251.72015E-050.0007845624.764434539RAI  
 GO:005133: regulation of ligase activityBiological process1271570145864.3249814681.7568E-050.000784  
 GO:005144: regulation of ubiquitin-protein ligase activityBiological process1271570145864.3249814681.7568E-050.000784  
 GO:003462: macromolecular complex subunit organizationBiological process44578570145861.9479876161.81776E-050.0008  
 GO:003472: organizationBiological process15109570145863.5214872042.14235E-050.0009339624.669109756CENPA//OIP5//  
 GO:000632: packagingBiological process17136570145863.1986842112.23711E-050.0009637984.650313499CENPA//OIP5//  
 GO:000632: assemblyBiological process1499570145863.618713452.93906E-050.0012420884.531791844CENPA//OIP5//CI  
 GO:000827: deathBiological process861429570145861.5400243082.98107E-050.0012420884.525628126IFI6//SOD2//S  
 GO:004852: regulation of cellular processBiological process1222209570145861.4132710682.98481E-050.00  
 GO:001626: processBiological process861431570145861.5378719343.13773E-050.0012910544.503384031IFI6//SOD2//SYCP2//TRII  
 GO:000652: of cellular amino acid metabolic processBiological process1053570145864.8282025E-050.0012910544.503384031IFI6//SOD2//SYCP2//TRII  
 GO:003322: of cellular amine metabolic processBiological process1164570145864.3981907893.33446E-050.0012910544.503384031IFI6//SOD2//SYCP2//TRII

GO:001250 cell deathBiological process801311570145861.5615239473.64757E-050.0014518924.4379961431F  
GO:004426 protein metabolic processBio process1482810570145861.3477729913.97731E-050.0015661194.4  
GO:000081 chromatid segregation process944570145865.2342105264.15658E-050.0016192974.381263857NDC8  
GO:001607 metabolic processBio process39510570145861.9568421054.94979E-050.0018865164.305413239DC  
GO:000697 process791302570145861.5526639184.98493E-050.0018865164.3023412551F16//SOD2//HMGB2//CY  
GO:003157 integrity checkpoint process15117570145863.2807017544.99705E-050.0018865164.301286108H2/  
GO:003146 assemblyBiological process14104570145863.4447368425.14141E-050.0018979724.288918037CENPA//OIP5/  
GO:004801 signalingBiological process1167570145864.2012568745.18288E-050.0018979724.28542857NDC80//UBE2C//  
GO:004801 lipid-media signalingBiological process1167570145864.2012568745.18288E-050.0018979724.28542857NDC8  
GO:009016 regulation of kidney developme process5125701458610.66228075.64373E-050.0020462  
GO:000996 processBio process51512380570145861.0645055695.8057E-050.0020843594.236145554BRIX1//KPN  
GO:000697 to DNA damage stimulusBiological process38501570145861.9409181647.34664E-050.0026  
GO:004304 chromatin remodeling process728570145866.3973684217.75625E-050.0027310954.110348223CENP  
GO:005116 exportBiological process1395570145863.5017174527.97159E-050.0027801884.098454837RPS15//HNRNF  
GO:003033 damage response, signal transductio by p53 class mediatorBiological process139  
GO:004851 regulation of biological processBio process1282399570145861.3653408228.97426E-050.00  
GO:000626 metabolic processBio process45638570145861.8049001819.19544E-050.0031179354.036427471KPI  
GO:000007 damage checkpoint process14110570145863.2568421059.58348E-050.0032196984.018476645PSI  
GO:000906 processBio process911595570145861.4599637020.0001229610.0040934713.910233988WIP12//ATG1  
GO:005164 localization process841445570145861.487554180.0001248280.0041182073.903687224RPS15//IFNG//  
GO:000006 phase of mitotic cell cycleBiological process15128570145862.9987664470.00014  
GO:003227 regulation of cellular protein metabolic processBio process29354570145862.0963126  
GO:000633 replication- nucleosom assemblyBiological process622570145866.9789473680.0001514720.0047818243.8196  
GO:003406 nucleosom assembly at centromere process622570145866.9789473680.0001514720.004781  
GO:003472 replication- nucleosom organizatio process622570145866.9789473680.0001514720.0047818243.8196  
GO:003136 regulation of protein ubiquitinatio process1288570145863.4894736840.0001541080.00482  
GO:000007 sister chromatid segregation process841570145864.9930680360.0001580340.0049044133.8012  
GO:004277 transductio in response to DNA damageBiological process14117570145863.0619883  
GO:005164 of localization in cellBiological process771313570145861.5006774360.0001877690.005  
GO:007117 assembly checkpoint process732570145865.5976973680.0001924850.0057649453.715603624CENF  
GO:007117 cell cycle spindle checkpoint process732570145865.5976973680.0001924850.005764  
GO:003051 regulation of BMP signaling pathwayBiological process515570145868.5298245610.0001940  
GO:004406 component biogenesis process741251570145861.5136858930.0001952080.0057649453.709501491BI  
GO:000633 assembly or disassemb process16147570145862.7852488360.0002042540.0059838393.68  
GO:005132 phaseBiological process15134570145862.8644933230.0002351350.0068338463.628682597PSMA8//ORC  
GO:003304 of organelle organizatio process25295570145862.1685994650.0002413820.0069601783.61  
GO:003106 remodeling at centromere process624570145866.3973684210.0002556250.0072565773.5923  
GO:009016 of kidney developme process624570145866.3973684210.0002556250.0072565773.5923  
GO:003462 macromole complex assemblyBiological process33440570145861.9192105260.0002667330.0075136563.57  
GO:000697 to stressBiological process1272440570145861.331911130.0002833570.0079210293.547665433W  
GO:007184 component disassembl at cellular levelBiological process21231570145862.3263157890.00029  
GO:004393 complex subunit organizatio process57913570145861.5975903610.0002958240.008145183.528  
GO:005170 processBio process55873570145861.6121661540.000302810.0082753113.518829198B2M//PPBP//IFI  
GO:007184 component assembly at cellular levelBiological process53833570145861.6281417830.00030  
GO:005124 regulation of protein metabolic processBio process29371570145862.0002553550.00031  
GO:004346 exchangeBiological process625570145866.1414736840.0003253360.0086331933.487667798CENPA//OIP5//C  
GO:007097 K11-linked ubiquitinatio process625570145866.1414736840.0003253360.0086331933.487667798UBE2  
GO:002241 component disassemb process21233570145862.3063474140.0003283810.0086513023.483622059HM  
GO:003146 regulation of protein modificatio processBio process24285570145862.1549030470.00035  
GO:002260 component assemblyBiological process671130570145861.517251980.0003750620.009740983.425896561RPS  
GO:005131 of spindle microtubule to chromosom process4105701458610.235789470.0004014  
GO:003146 regulation of protein modificatio processBio process16157570145862.6078444520.00043  
GO:003226 of cellular protein metabolic processBio process57927570145861.5734627830.00043  
GO:005164 of organelle localization process1185570145863.3115789470.0004563970.0115263793.3406

GO:000646 modification of protein structure process Bio process 112107570145861.3480928230.0004836740.0121316033.3154472810  
GO:003351 response to stress Biol process 53850570145861.5955789470.0004983890.0124156553.30303030  
GO:007092 assembly Biol process 962570145863.7146010190.0006368330.0157573083.1959746RPS14//RPS15//WI  
GO:000700 metaphase transition Biol process 850570145864.0943157890.0006521370.0160044663.185661065CENF  
GO:005000 localization process 519570145866.7340720220.0006599330.0160044663.180500204DLGAP5//KIF18A  
GO:005130 of chromosome localization process 519570145866.7340720220.0006599330.0160044663.180500204DLGAP5//KIF18A  
GO:005070 of catalytic activity Biol process 641095570145861.4956404710.0007409440.0178508943.1000000000  
GO:007093 K48-linked ubiquitination Biol process 629570145865.2943738660.0007640250.0182866653.116892389MARC  
GO:003130 of protein modification process Bio process 46724570145861.6258505380.0007917340.0188045413.098367971UBE2S//UBE2T  
GO:000020 polyubiquitin complex assembly Biol process 1077570145863.3233082710.0007973190.0188045413.098367971UBE2S//UBE2T  
GO:006500 complex assembly Biol process 48765570145861.6056140350.0008010670.0188045413.096331004RP  
GO:001090 of cell death Biol process 601016570145861.5111893910.0008462710.0197391343.0700000000  
GO:004850 development process 520570145866.3973684210.0008518710.0197439963.069626202CRKL//CTNNB1//GATA1  
GO:006060 subdivision of an epithelial terminal unit Biologic process 412570145868.529824560000000000  
GO:000620 DNA replication Biol process 1192570145863.0596109840.0008994150.020585353.046040112RNAS  
GO:003020 nuclear change Biol process 630570145865.1178947370.0009238820.0210140093.034383557HMGI  
GO:003000 of mitotic metaphase transition Biol process 741570145864.3689345310.0009482970.02143600000000  
GO:007050 of microtubule cytoskeleton organization process 853570145863.8625620660.0009716380.02167000000000  
GO:003050 signaling pathway Biol process 1079570145863.2391738840.0009766820.0216790653.010246788FOX  
GO:000030 splicing, via transesterification reactions Biol process 18202570145862.280250130.0009768010.02167000000000  
GO:003130 regulation of cellular metabolic process Bio process 731301570145861.4358428740.0009768010.02167000000000  
GO:006500 of molecular function Bio process 751347570145861.4248036570.0010370310.0227401642.9000000000  
GO:005110 import Biol process 15155570145862.4764006790.0011046250.024014862.956785007IFNG//KPNA2//I  
GO:000700 cell cycle spindle assembly checkpoint process 631570145864.9528013580.0011082000000000  
GO:004400 regulation of molecular function Bio process 47757570145861.5887784190.0011296110.02430000000000  
GO:004420 metabolic process Bio process 3487992570145861.1142563620.0012049050.0258032842.919047246R  
GO:005120 organization process 743570145864.1657282740.0012706280.0270525562.89598159NPM1//KIF11//SG  
GO:004580 regulation of mitotic metaphase transition Biol process 632570145864.7980263160.0013196000000000  
GO:004290 of apoptosis Biol process 58993570145861.4946520380.0013373490.0281458172.873755239B2I  
GO:006030 I interferon- $\gamma$  signaling pathway Biol process 969570145863.3377574370.0013971380.02899200000000  
GO:007130 response to type I interferon Biol process 969570145863.3377574370.0013971380.02899200000000  
GO:003450 localization to nucleus Bio process 16175570145862.3396090230.001401340.0289926892.853000000000  
GO:003430 to type I interferon Biol process 970570145863.2900751880.0015489680.03186600000000  
GO:004440 interaction between organisms Biol process 26354570145861.8794528690.0015658170.0320336462.8000000000  
GO:004300 of programme cell death Biol process 581003570145861.4797502230.0016847420.034000000000  
GO:000690 component disassembly involved in apoptosis Biol process 971570145863.2437361010.0017137000000000  
GO:000620 replication Biol process 20248570145862.0636672330.0017893960.0360042132.747293629TOP2A//RNAS  
GO:004340 modification process 112189570145861.2975932290.0018880020.037410532.723997569CDKN3//CKS  
GO:000030 splicing, via transesterification reactions with bulged adenosine as nucleophile  
GO:000030 mRNA splicing, via spliceosome process 17197570145862.2082286940.0018899370.037400000000  
GO:005120 of protein metabolic process Bio process 57988570145861.4763157890.0019440280.038200000000  
GO:000660 targeting Biol process 22286570145861.9684210530.0019755940.0386878432.704302212IFNG//KPNA2//I  
GO:001700 import Biol process 17198570145862.1970760230.0019947210.0388114282.700117786IFNG//KPNA2//I  
GO:004850 regulation of cellular process Bio process 1212424570145861.2773623410.0020031020.0300000000  
GO:000070 catabolic process, endonucleolytic Biol process 524570145865.3311403510.0020523220.0389409432.687700000000  
GO:000630 fragmentation involved in apoptotic nuclear change Biol process 524570145865.3311403510.0020523220.0389409432.687700000000  
GO:004580 regulation of mitosis Biol process 524570145865.3311403510.0020523220.0389409432.687700000000  
GO:005170 regulation of nuclear division Biol process 524570145865.3311403510.0020523220.0389409432.687700000000  
GO:004420 macromolecule metabolic process Bio process 2716072570145861.1420861940.0020794190.0392517062.0000000000  
GO:003050 of BMP signaling pathway Biol process 747570145863.8111982080.0021676940.040500000000  
GO:003100 organizing center organization process 747570145863.8111982080.0021676940.0405004892.664000000000  
GO:003280 of microtubule process Bio process 860570145863.4119298250.0022092670.0406736382.655700000000  
GO:004840 nervous system development process 415570145866.8238596490.0022324960.0406736382.651200000000  
GO:004840 nervous system development process 415570145866.8238596490.0022324960.0406736382.651200000000

GO:00714 response to oxygen levels Biol process 415570145866.8238596490.0022324960.040673  
GO:00714 response to hypoxia Bio process 415570145866.8238596490.0022324960.0406736382.6512  
GO:00081 localization process 641146570145861.4290805550.0022819520.0413688552.6416934751FNG//KPNA2  
GO:00330 localization process 751388570145861.3827165180.0023234310.0419133182.6338702611FNG//VPS13  
GO:00422 nucleoside metabolic process Bio process 636570145864.2649122810.0024852720.0439665022.6046  
GO:00458 regulation of mitosis Biol process 636570145864.2649122810.0024852720.0439665022.6046  
GO:00461 ribonucleoside metabolic process Bio process 636570145864.2649122810.0024852720.0439665022.6046  
GO:00517 regulation of nuclear division Biol process 636570145864.2649122810.0024852720.043966  
GO:00063 remodeling process 975570145863.0707368420.0025186080.0443420312.598839419BAZ1B//CENPA//  
GO:00066 import into nucleus Bio process 14152570145862.3569252080.002542840.0445544522.594  
GO:00229 electron transport chain Biol process 11105570145862.6808020050.0026458510.0461385972.57  
GO:00217 cell development process 637570145864.1496443810.0028700850.0496102842.542105168CD9//  
GO:00104 from mitosis Biol process 416570145866.3973684210.0028855790.0496102842.53976702KNTC1  
GO:00422 small subunit biogenesis process 416570145866.3973684210.0028855790.0496102842.5397  
GO:00098 regulation of metabolic process Bio process 731357570145861.3765892250.0029763670.050  
GO:00070 cycle Biol process 526570145864.9210526320.0029781080.0504899642.52605953KIF11//NPM1//CTF  
GO:00319 signaling cascade Bic process 526570145864.9210526320.0029781080.0504899642.52605953AKT1S  
GO:00430 regulation of catalytic activity Biol process 40651570145861.5723178920.0031169760.0526  
GO:00106 of cell communication process 56989570145861.4489489650.0031878960.0535508122.49  
GO:00025 degranulation process 980570145862.8788157890.0039169540.0654971872.407051577EGF//IGF1//ITGA  
GO:00333 localization to organelle B process 21285570145861.8855401660.0040997150.0682416212.38  
GO:00083 splicing Biol process 22305570145861.8457981020.0043163150.0715219272.364886856SRSF10//SMN  
GO:00510 transport Bio process 11112570145862.513251880.00436670.0720308782.359846655NXF1//SRSF10//N  
GO:00098 regulation of metabolic process Bio process 591070570145861.4110083620.0044404540.072  
GO:00106 regulation of macromolecule metabolic process Bio process 561005570145861.4258811210.0044  
GO:00091 diphosphate metabolic process Bio process 418570145865.6865497080.0045598230.0742136462.3410  
GO:00064 process 28423570145861.693865870.0046779980.0758001262.329939975EIF1AX//EIF4H//RPL27A//F  
GO:00150 transport Bio process 53943570145861.4382206840.0047391940.0764534252.3242955351FNG//KPNA2/  
GO:00195 metabolic process Bio process 1563317570145861.2034844420.0047732070.0766644072.321189712  
GO:00064 export from nucleus Bio process 868570145863.0105263160.0048643480.0776862362.3129  
GO:00451 of protein localization process 54966570145861.4304674730.0048792560.0776862362.31  
GO:00226 complex biogenesis process 16199570145862.057445120.0050808640.0805459922.294062424BR1  
GO:00109 regulation of cell cycle process Bio process 869570145862.96689550.005319064  
GO:00000 transition of mitotic cell cycle Biol process 11115570145862.4476887870.00533  
GO:00324 regulation of type I interferon production I process 530570145864.26491228  
GO:00469 transport Bio process 46802570145861.4677254230.0057803210.089606352.238048064RPS15//IFNG//F  
GO:00062 ligation Biol process 310570145867.6768421050.0057992090.089606352.236631206HMGB2//RAD51//  
GO:00400 of mitotic spindle localization process 310570145867.6768421050.0057992090.089606  
GO:00423 of protein import into nucleus Bio process 985570145862.7094736840.0058601  
GO:00468 of nucleocytoplasmic transport Bio process 10101570145862.5336112560.0060774550.0931198322.216  
GO:00016 involved in ureteric bud morphogenesis process 643570145863.5706242350.0061791  
GO:00226 complex assembly B process 986570145862.6779681760.0063251220.0961103552.198931116RPS1  
GO:00003 snRNP assembly B process 531570145864.1273344650.0065525360.0991544892.183590593SRSF  
GO:00105 of cellular ketone metabolic process Bio process 12135570145862.2746198830.00663  
GO:00018 development process 11119570145862.3654135340.0068783090.102809672.162518289CTNNB1//IFNG/  
GO:00516 localization process 11119570145862.3654135340.0068783090.102809672.162518289RPS15//NDC80/  
GO:00431 of I-kappaB kinase/NF-kappaB cascade Bic process 12137570145862.2414137530.0074415260.1107  
GO:00070 organization process 34561570145861.5508771930.0075664660.1121797512.121106916PRC1//KIF23//I  
GO:00606 bud morphogenesis process 645570145863.4119298250.0077320470.1129913182.111705519CTNN  
GO:00424 nucleoside biosynthesis Bio process 311570145866.9789473680.0077446260.1129913182.11099  
GO:00424 biosynthesis Bio process 311570145866.9789473680.0077446260.1129913182.110999544PRTF1  
GO:00461 ribonucleoside biosynthesis Bio process 311570145866.9789473680.0077446260.1129913182.11099  
GO:00009 process 759570145863.0360392510.0078707840.1134756392.103981987NUSAP1//KIF20A//BIRC5//AI  
GO:00064 export from nucleus Bio process 759570145863.0360392510.0078707840.1134756392.10398

GO:000911 metabolic process Bio process 759570145863.0360392510.0078707840.1134756392.103981987PRTF  
GO:007184 component biogenesis at cellular level Biol process 16209570145861.959002770.008045  
GO:004571 regulation of cell cycle Biol process 874570145862.7664295870.0080965380.115818  
GO:003132 regulation of cellular metabolic process Bio process 54994570145861.3901726150.00852  
GO:007203 system developme process 11123570145862.2884895160.0087521130.1242257242.057887098DC  
GO:004533 respirationI process 12140570145862.1933834590.0087873020.1242436332.056144433IDH3A//COX6  
GO:000632 organizatio process 29465570145861.595902660.0090363890.1268373882.044005086CHD1//BAZ1B//  
GO:000822 of blood pressure Bi process 10107570145862.3915395970.0090400210.1268373882.04  
GO:007182 complex subunit organizatio process 991570145862.5308270680.0090889310.1270368912.0414  
GO:004687 secretion Bi process 14176570145862.0355263160.0092505530.127716862.033832321YWHAZ//SYT9//  
GO:005064 acid transport Bi process 11124570145862.2700339560.0092770850.127716862.032588469HNR  
GO:005064 transport Bi process 11124570145862.2700339560.0092770850.127716862.032588469HNRNPA1//NXF  
GO:005122 of RNA localization process 11124570145862.2700339560.0092770850.127716862.032  
GO:003224 regulation of cellular protein metabolic process Bio process 17231570145861.883208  
GO:000164 system developme process 13159570145862.0922211190.0095751980.1297046862.018852259DC  
GO:000702 depolymeri process 422570145864.6526315790.0096339910.1297046862.016193771SBDS//CCNB1//S  
GO:003444 anchoringE process 422570145864.6526315790.0096339910.1297046862.016193771NDC80//SGOL1//  
GO:004884 extension involved in axon guidance Bi process 422570145864.6526315790.0096339  
GO:005068 of mRNA processing process 422570145864.6526315790.0096339910.1297046862.0161  
GO:001066 regulation of macromole metabolic process Bio process 661268570145861.3319442140.0097  
GO:000632 recombinat process 534570145863.7631578950.00975040.130300862.010977548PCNA//POLE2//RFC  
GO:002293 transport chain Biol process 12142570145862.1624907340.0097850180.130300862.009438364CO  
GO:000702 of exit from mitosis Biol process 312570145866.3973684210.0100298590.131646  
GO:004312 regulation of I-kappaB kinase/NF- cascade Bi process 312570145866.3973684210.0100298  
GO:005122 of spindle localization process 312570145866.3973684210.0100298590.1316463871.9987  
GO:005164 localization process 312570145866.3973684210.0100298590.1316463871.998705192NDC80//CENPA//  
GO:000722 kinase/NF- cascade Bi process 14178570145862.0126552340.0101618250.1329021531.993028293NL  
GO:006503 of biological quality Biol process 1062192570145861.2374471760.0102005520.1329338871.1  
GO:003411 homeostas process 762570145862.8891341260.0102685810.1333459011.988489562INHBA//RPS14//S  
GO:000643 localization process 11127570145862.2164111070.0109986390.1420792841.958661051HNPNPA1//NX  
GO:000022 assembly B process 535570145863.6556390980.011018710.1420792841.95786924SRSF10//SRSF9//S  
GO:009011 regulation of transmembr receptor protein serine/thre kinase signaling pathway Bi  
GO:000611 nucleoside nucleotide and nucleic acid metabolic process Bio process 211474557014  
GO:001593 nucleoside nucleotide and nucleic acid transport Bi process 12146570145862.103244  
GO:000632 recombinat process 13164570145862.028433890.0122128510.1552897881.913182956KPNA2//TOP2A  
GO:004862 process involved in reproductic process 23355570145861.6579095630.0124489860.1577  
GO:004403 of endocrine process Bio process 313570145865.9052631580.0126654490.1595938261.8973  
GO:001022 to organic nitrogen Bi process 996570145862.3990131580.0126820870.1595938261.8968  
GO:000702 chromatid cohesion Bi process 424570145864.2649122810.0131602570.1650440411.880735639BUB1  
GO:000992 transport Bi process 14184570145861.9470251720.013322980.166514521.875398609YWHAZ//SYT9//I  
GO:005122 regulation of protein metabolic process Bio process 17241570145861.8050666080.01384  
GO:000632 processing process 24379570145861.6204416050.014017050.1727234591.853343386SRSF10//SMN2  
GO:004621 oxide metabolic process Bio process 651570145863.0105263160.0140555960.1727234591.8521  
GO:004682 regulation of nucleocyto transport Bi process 651570145863.0105263160.0140555960.172723  
GO:007253 oxygen species metabolic process Bio process 651570145863.0105263160.0140555960.172723  
GO:003314 of intracellular protein transport Bi process 998570145862.3500537060.0143815150.176137  
GO:004852 regulation of biological process Bio process 1252673570145861.1966645010.0147964160.18  
GO:000622 repair Biol process 22341570145861.6509337860.014955690.1819526131.825193548GTF2H3//RAD5  
GO:006032 of cellular localization process 25402570145861.5913851790.0151551260.1836295571.81  
GO:000753 implantatio process 425570145864.0943157890.0151938160.1836295571.818333124IL1B//SOD1//STC  
GO:000603 process 652570145862.9526315790.015380320.1852721491.813034617ARPP19//SDS//ALDOC//GAP  
GO:003271 of monooxyge activity Biol process 538570145863.3670360110.0154872250.1859482531.8100  
GO:004222 assembly B process 314570145865.4834586470.015659050.1867864491.805234599RPS14//RPS15//N  
GO:004252 anion generationI process 314570145865.4834586470.015659050.1867864491.805234599NCF2//

GO:004366 protein modification process 13170570145861.9568421050.0160821480.1912104681.793655959DP  
 GO:003461 protein localization process 33571570145861.4789012810.016158930.1915016221.791587403IFNG  
 GO:003238 of intracellular transport Bi process 10117570145862.1871345030.0162836320.1917384611.788  
 GO:009005 of transmembrane receptor protein serine/threonine kinase signaling pathway Bi process 101  
 GO:000911 metabolic process Bio process 884570145862.4370927320.0167283730.1963439121.776546305PRTF  
 GO:007072 macromolecule localization process 33573570145861.4737393220.01691980.1974402371.771604767IFNG  
 GO:000675 metabolic process Bio process 671327570145861.2920080910.0172440350.1974402371.763361108CI  
 GO:000675 metabolic process Bio process 671327570145861.2920080910.0172440350.1974402371.763361108CI  
 GO:000175 crest cell migration Bi process 426570145863.9368421050.0174148540.1974402371.75908  
 GO:000667 export from nucleus Bi process 426570145863.9368421050.0174148540.1974402371.75908  
 GO:001067 regulation of cellular carbohydrate metabolic process Bio process 426570145863.9368421050  
 GO:003033 differentiation process 426570145863.9368421050.0174148540.1974402371.759080154FOXDL1//FOXDL  
 GO:003257 to progesterone stimulus Bi process 426570145863.9368421050.0174148540.1974402371.75908  
 GO:004542 regulation of nitric oxide biosynthesis process Bio process 426570145863.9368421050  
 GO:004597 regulation of carbohydrate metabolic process Bio process 426570145863.9368421050.0174148  
 GO:005093 cell differentiation process 426570145863.9368421050.0174148540.1974402371.759080154FOXDL  
 GO:004245 to drug Biolog process 19288570145861.6881944440.018419110.2081814251.734731353CEN  
 GO:000996 regulation of signal transduction process 28472570145861.5180196250.0187613110.2113  
 GO:005117 process 1643640570145861.1529323310.0190050510.2116579011.721130955RPS15//IFNG//NDC80//  
 GO:003277 regulation of monooxygenase activity Biolog process 315570145865.1178947370.0190156880.211657  
 GO:005133 plate congression process 315570145865.1178947370.0190156880.2116579011.720887957KIF18  
 GO:005195 of chromosome segregation Biolog process 315570145865.1178947370.0190156880.2116579011.72088  
 GO:001064 regulation of cell communication process 29495570145861.4991812870.0197224240.2188  
 GO:004277 synthesis coupled electron transport Bi process 655570145862.7915789470.0198680320.219146  
 GO:004277 ATP synthesis coupled electron transport Bi process 655570145862.7915789470.0198680  
 GO:003462 macromolecule complex disassembly process 12157570145861.9558833390.0203217160.2234778531.69  
 GO:003110 polymerization or depolymerization process 541570145863.1206675220.0210261450.2305321681.6772  
 GO:002305 regulation of signaling Bi process 29498570145861.4901500740.021190340.2316388831.6738  
 GO:003238 regulation of intracellular transport Bi process 656570145862.7417293230.0215425660.233399  
 GO:004566 of osteoblast differentiation process 656570145862.7417293230.0215425660.2333990381.6667  
 GO:005134 of oxidoreductase activity Biolog process 656570145862.7417293230.0215425660.2333990381.6667  
 GO:006033 signaling pathway Bi process 772570145862.4878654970.0220894560.2384700391.655814976IFNG  
 GO:003296 complex disassembly process 12159570145861.9312810330.0221960950.2384700391.653723417BA  
 GO:005125 of localization process 1423121570145861.1642759570.0222706170.2384700391.652267746F  
 GO:000688 protein transport Bi process 27458570145861.5085497590.0222710960.2384700391.652258412IFN  
 GO:005105 of DNA metabolic process Bio process 11141570145861.9963419190.0224361850.2388  
 GO:000688 metabolic process Bio process 428570145863.6556390980.022437230.2388521381.649030764SOD1//  
 GO:006095 hormone secretion Bi process 316570145864.7980263160.0227380210.2413525571.64324734INHBA  
 GO:003434 to interferon-gamma process 889570145862.300177410.0229230640.2426134661.639727339HLA-B//  
 GO:003027 differentiation process 657570145862.6936288090.0233098980.2452897871.63245963HMGB2//INHBA//J  
 GO:005122 regulation of protein transport Bi process 657570145862.6936288090.0233098980.245289  
 GO:000712 process 10124570145862.0636672330.0234537350.245393081.629787984TRIP13//TOP2A//SYCP2//F  
 GO:005132 phase of meiotic cell cycle Biolog process 10124570145862.0636672330.02345  
 GO:005124 regulation of multicellular organismal process Bio process 20316570145861.6195869420.02363  
 GO:004887 of number of cells Biolog process 9107570145862.1523856370.0241576770.25132  
 GO:007182 complex subunit organization process 37676570145861.4006072870.0242526850.2515958461.61  
 GO:003284 of homeostatic process Bio process 11143570145861.9684210530.0245970590.2541608771.609  
 GO:001063 regulation of organelle organization process 10125570145862.0471578950.0246387520.2541  
 GO:004234 of NF-kappaB import into nucleus Bi process 429570145863.5295825770.0252459  
 GO:004234 import into nucleus Bi process 429570145863.5295825770.0252459590.257914331.59780  
 GO:004848 nervous system development process 429570145863.5295825770.0252459590.257914331.59780  
 GO:000612 electron transport, NADH to ubiquinone process 543570145862.9755201960.0253547  
 GO:000688 oxide biosynthesis process Bio process 543570145862.9755201960.0253547680.257914331.59594  
 GO:005132 cell cycle Biolog process 10126570145862.030910610.0258662610.2623884961.587266348TRIF

GO:000717 receptor protein serine/threonine kinase signaling pathwayBio process13182570145861.8278191  
GO:003433 localization at cell surfaceBio process317570145864.5157894740.0268265650.267738  
GO:003541 import into nucleusBio process317570145864.5157894740.0268265650.2677385351.5714  
GO:003542 of catenin import into nucleusBio process317570145864.5157894740.0268265  
GO:005188 of mitochondr membrane potentialBio process317570145864.5157894740.0268265650.267738  
GO:004362 protein complex disassemb process11145570145861.9412704170.0269054560.2677385351.57  
GO:004688 of hormone secretionBi process11145570145861.9412704170.0269054560.2677385351.57  
GO:004206 healingBio process32574570145861.4265908670.0276843770.2743299841.557765243EGF//ZFPM2//  
GO:004233 regulation of protein import into nucleusBio process544570145862.90789473  
GO:000700 organizatio process11146570145861.9279740450.0281165260.2766764721.5510383451FI6//SOD2//RN  
GO:000018 mRNA catabolic process, nonsense-r decayBiolo process430570145863.4119298250.0282569  
GO:002154 nerve developme process430570145863.4119298250.0282569640.2766764721.548874508FOXC  
GO:004566 regulation of osteoblast differentiati process430570145863.4119298250.0282569640.276676  
GO:004324 complex disassemb process11147570145861.9148585750.0293663140.2867718481.532150557RP  
GO:004228 biogenesis process10129570145861.9836801310.0298110310.2903404111.525623008RPS14//RPS18  
GO:000154 follicle developme process545570145862.8432748540.0302158690.292726221.519764915CCNE  
GO:003461 response to reactive oxygen speciesBio process545570145862.8432748540.0302158  
GO:000629 repair, DNA gap fillingBioloç process318570145864.2649122810.0312799130.299355  
GO:001594 nucleoside and nucleotide interconver process318570145864.2649122810.0312799130.299355  
GO:003055 genitalia developme process318570145864.2649122810.0312799130.2993559861.504734458SYCF  
GO:004662 regulation of insulin receptor signaling pathwayBio process318570145864.26491228  
GO:001931 biosynthetic processBio process661570145862.5169974120.0313442450.2993559861.503842191SDS//  
GO:004233 modified amino acid biosynthetic processBio process431570145863.3018675720.0314724  
GO:004241 biogenic amine biosynthetic processBio process431570145863.3018675720.0314724340.299355  
GO:004222 to chemical stimulusBio process1012172570145861.1899340890.0324989730.3077242111.4  
GO:007134 response to interferon-γ process778570145862.2964912280.0325202810.3077242111.48784  
GO:003478 regulation of transmemb transportBi process546570145862.7814645310.0328512590.308521  
GO:004278 ubiquitinatio involved in ubiquitin-dc protein catabolic processBio process546570145862  
GO:005121 developme process9113570145862.0380996740.0328573280.3085218811.483367762IMPAD1//NPPC  
GO:000222 to molecule of bacterial originBioloç process11150570145861.8765614040.03335  
GO:000611 phosphoryl process662570145862.4764006790.0336023510.3131089341.47363033NDUFA8//NDUFB  
GO:003133 regulation of cellular catabolic processBio process662570145862.4764006790.0336023  
GO:004308 regulation of catalytic activityBioloç process23391570145861.5052631580.033782450.31398  
GO:003007 secretionBi process10132570145861.9385964910.0341638150.3167288391.466433635SYT9//IFNG//II  
GO:003558 signal transductio process801680570145861.2185463660.0344712610.3187721151.46254283CA  
GO:004682 regulation of nucleocyto transportBi process432570145863.1986842110.0348939830.321868  
GO:003464 nitrogen compound metabolic processBio process2225149570145861.1032944570.0355296150.32  
GO:000742 nervous system developme process547570145862.7222844340.0356254780.3261512551.4482  
GO:003247 of type I interferon productionI process547570145862.7222844340.0356254  
GO:003027 of ossification process897570145862.1104720560.0359287890.3262575711.444557422SMUF  
GO:000008 of transcriptio involved in G1/S phase of mitotic cell  
GO:004352 process319570145864.0404432130.0360949360.3262575711.442553725CRH//ADNP//AKT1S1  
GO:006033 of response to interferon-γ process319570145864.0404432130.0360949360.326257  
GO:006033 of interferon-γ signaling pathwayBio process319570145864.0404432130.0360949360.326257  
GO:009033 acid metabolic processBio process1764007570145861.1239698950.0362192640.3262575711.4  
GO:001600 reproductic process24415570145861.4798731770.036260740.3262575711.440563332EIF2AK2//RPL2  
GO:000755 coagulator process27481570145861.4364153630.0379245810.3403917061.421079207TFPI//EGF//IG  
GO:000633 catabolic processBio process664570145862.3990131580.0384278980.3440659231.415353371GTF2  
GO:003398 to lipidBiologi process548570145862.6655701750.0385399270.3442273521.414089107TGFE  
GO:005104 regulation of secretionBi process781570145862.2114359970.0387949450.3456620181.41122  
GO:004317 metabolic processBio process2826677570145861.080759560.0389903210.3465596041.409043185KI  
GO:000718 communicæ process811715570145861.2085990490.0394355030.3496678281.404112613WIPI2//ATG1  
GO:000828 regulation of cell proliferatio process23398570145861.478788680.0400327030.35410  
GO:000755 process27484570145861.4275119620.0404587190.3561534371.39298787EGF//ZFPM2//GCX//GRB



GO:00508 process27484570145861.4275119620.0404587190.3561534371.39298787EGF//ZFPM2//GGCX//GRB;  
GO:00323 to estradiol stimulusBic process782570145862.1844672660.0410507280.3604982411.3866;  
GO:00320 of TOR signaling cascadeBic process320570145863.8384210530.0412669650.360667  
GO:00420 regulation of cytokine biosynthetic processBio process320570145863.8384210530.0412669  
GO:00903 acid phosphodiester bond hydrolysisE process549570145862.6111707840.0415957630.362675  
GO:00461 biosynthetic processBio process8100570145862.0471578950.0418774560.3642642411.378019704SDS  
GO:00100 to organic substanceE process591206570145861.2518896740.0420802640.3650994371.3;  
GO:00425 of tyrosine phosphoryl of STAT proteinBiol process434570145863.0105263160.0423589  
GO:00903 regulation of intracellular protein transportBi process434570145863.0105263160.0423589  
GO:00324 to lipopolysaccharide process10137570145861.8678447940.0423722720.3650994371.372918247MT  
GO:00650 regulationE process3327972570145861.0656930840.0430351260.3691710881.366176921KPNA2//UBI  
GO:005117 regulation of nitrogen compound metabolic processBio process48955570145861.2861724  
GO:00461 catabolic processBio process8101570145862.0268890050.0439969840.3764414881.35657709ALDC  
GO:00067 compound metabolic processBio process10138570145861.8543096870.044162270.3769749021.3549  
GO:00508 of body fluid levelsBiol process30554570145861.3857115710.0446026990.3798  
GO:00163 process12177570145861.7348795720.0451812620.3838834821.345041644PPM1K//FBXW11//PPM1A  
GO:00093 biosynthetic processBio process9120570145861.9192105260.0454948230.3847622191.342038023CDC  
GO:00182 modification process9120570145861.9192105260.0454948230.3847622191.342038023TPST1//GH1//A  
GO:00100 cell differentiation process784570145862.132456140.0458139190.386198351.339002552CTNNB  
GO:00510 regulation of bindingBiol process10139570145861.840969330.0460029310.386198351.3372  
GO:00604 development process8102570145862.0070175440.046185990.386198351.335489738FOXD4L1//FOXD4  
GO:00062 DNA replication initiationBic process435570145862.9245112780.046402860.386198351.3334552  
GO:00140 crest cell development process435570145862.9245112780.046402860.386198351.3334552  
GO:003111 of microtubule polymerization or depolymerization process435570145862.9245112780.046402860  
GO:00454 of nitric oxide biosynthetic processBio process435570145862.9245112780.046402860  
GO:00064 ADP-ribosylation process321570145863.6556390980.0467899660.3867829651.329847275ADNP//SIRT4//TF  
GO:00071 meiosisBio process321570145863.6556390980.0467899660.3867829651.329847275UBR2//TRIP13//S  
GO:00109 regulation of glucose metabolic processBio process321570145863.6556390980.0467899  
GO:00140 to amine stimulusBic process668570145862.2578947370.0493464140.4069967751.30674

ID

s)/(List.Total/Pop.Tot

thod  
e))

Enrichment GENES

1//KIF23//NDC80//ZWINT//MAD2L1//NEK2//NUSAP1//CDKN3//ORC6//INHBA//PCNA//POLE2//MCM10//PSMA3//PSMA4//KIF23//NDC80//ZWINT//MAD2L1//NEK2//NUSAP1//KPNA2//UBE2C//PSMA8//ORC6//MDM2//ANAPC11//MCM10//PSMA3//NDC80//ZWINT//MAD2L1//NEK2//NUSAP1//KPNA2//UBE2C//PSMA8//ORC6//MDM2//ANAPC11//MCM10//PSMA3//KIF23//NDC80//ZWINT//MAD2L1//NEK2//NUSAP1//KPNA2//CDKN3//ORC6//INHBA//PCNA//POLE2//MCM10//FUS//NDC80//ZWINT//MAD2L1//NEK2//NUSAP1//KPNA2//KIF20A//CENPA//CENPF//STAG2//SGOL1//CENPI//BIRC5//SKA2//3934184UBE2C//PSMA8//ORC6//MAD2L1//MDM2//ANAPC11//MCM10//PSMA3//PSMA6//PSMA7//PSMB5//PSMC5//PSME1//E-1012.03614131UBE2C//PSMA8//ORC6//MAD2L1//MDM2//ANAPC11//MCM10//PSMA3//PSMA6//PSMA7//PSMB5//PSME1//E-124.68159E-1011.99023466NDC80//ZWINT//MAD2L1//NEK2//NUSAP1//SKA2//CENPA//CENPF//STAG2//SGOL1//CENPI//BIRC5//AURKA//PRC1//KIF23//KLHL21//TOP1//IL1B//PPBP//VEGFA//SYCP2//NDC80//USP16//CENPF//STAG2//SGOL1//E-0911.39161985PSMA8//MDM2//TRIAP1//PSMA3//PSMA6//PSMA7//PSMB5//PSMC5//PSMD9//PSMD11//PSMC5//PSMD12//MAD2L1//NEK2//NUSAP1//SKA2//CENPA//CENPF//STAG2//SGOL1//CENPI//BIRC5//CASC5//SPC25//CENPH//BUB1//NEK2//NUSAP1//SKA2//CENPA//CENPF//STAG2//SGOL1//CENPI//BIRC5//CASC5//SPC25//CENPH//BUB1//KIF18A//AFX//PSMA8//MDM2//TRIAP1//PSMA3//PSMA6//PSMA7//PSMB5//PSMC5//PSMD9//PSMD11//PSMD12//PSME1//ZNF143//MAD2L1//NEK2//NUSAP1//SKA2//CENPA//CENPF//STAG2//SGOL1//CENPI//BIRC5//CASC5//SPC25//CENPH//BLUCL1//E-0910.40531459UBE2C//PSMA8//ORC6//MAD2L1//MDM2//ANAPC11//MCM10//PSMA3//PSMA6//PSMA7//PSMB5//PSMC5//PSMD9//PSME1//E-286495PSMA8//MDM2//TRIAP1//PSMA3//PSMA6//PSMA7//PSMB5//PSMC5//PSMD9//PSMD11//PSMD12//PSME1//PSME1//E-09E-089.851535436UBE2C//PSMA8//ORC6//MAD2L1//MDM2//ANAPC11//MCM10//PSMA3//PSMA6//PSMA7//PSMB5//PSMC5//PSMD9//P//E-41.96952E-093.79599E-078.705640188MAD2L1//UBE2C//PSMA8//UBE2S//ANAPC11//PSMA3//PSMA6//PSMA7//FUS//MAD2L1//NEK2//NUSAP1//TOP2A//STAG2//RAD51C//BUB1//DLGAP5//KIF18A//CCNB1//SGOL1//CASC5//CENPF//E-083.64538E-067.679756553PSMA8//MDM2//TRIAP1//PSMA3//PSMA6//PSMA7//PSMB5//PSMC5//PSMD9//PSMC5//PSMD12//GCLM//UBE2C//MAD2L1//ANAPC11//PSMA3//PSMA6//PSMA7//PSMB5//PSMC5//PSMD9//PSMD11//PSMD12//E-067.558068946CDKN3//ORC6//INHBA//PCNA//POLE2//MCM10//PSMA3//PSMA6//PSMA7//PSMB5//PSMC5//PSME1//CENPF//STAG2//ZWINT//SGOL1//CENPI//BIRC5//SKA2//MAD2L1//CASC5//SPC25//CENPH//BUB1//KIF18A//CCNB1//E-705264DCP2//NCBP2//UPF3B//EIF4A3//ISG15//MDM2//UBR5//HERC6//SMURF1//SMURF2//LSM3//GTF2H3//HMGB1//PCNA//POLE2//MCM10//PSMA3//PSMA6//PSMA7//PSMB5//PSMC5//PSMD9//PSMD11//PSMD12//PSME1//RRM2//SIRT1//E-088.05132E-067.225112504PCNA//RRM2//CCNE1//WNT9A//CDKN3//ORC6//INHBA//POLE2//MCM10//PSMA3//PSMA4//RPS14//RPS15//WIPI2//ATG12//PTTG2//PTTG1//NDC80//ZWINT//MAD2L1//NEK2//NUSAP1//SKA2//CENPA//CCNB1//E-067.147829582UBE2C//MAD2L1//ANAPC11//PSMA3//PSMA6//PSMA7//PSMB5//PSMC5//PSMD9//PSMD11//PSMD12//PSME1//E-057.039089587GCLM//UBE2C//PSMA8//ANAPC11//PSMA3//PSMA6//PSMA7//PSMB5//PSMC5//PSMD9//PSMD11//PSMD12//E-09E-071.517E-056.891370676PRC1//KIF23//RPS14//RPS15//WIPI2//ATG12//PTTG2//PTTG1//NDC80//ZWINT//MAC1//E-15861.4665532311.33957E-071.53166E-056.873034485BRX1//PRC1//KIF23//RPS14//RPS15//WIPI2//ATG12//PTTG1//NDC80//KIF11//STMN1//SPC25//SBDS//CCNB1//HAUS2//UBE2C//ZWINT//CKS2//AURKA//SMURF1//UBE2D3//MDM2//HERC6//SMURF2//UBE2W//SUZ12//UBQLN1//UBE2S//UBE2T//UBE2C//MAD2L1//KIF23//NDC80//CENPA//STMN1//KIF18A//UBE2C//ZWINT//CKS2//KIF11//AURKA//SPC25//NPM1//SGOL1//CASC5//E-072.23955E-056.657255562FBXW11//UBR5//SMURF1//UBE2D3//MDM2//HERC6//SMURF2//FEM1B//DCAF7//MDC1//E-362.4141012912.33745E-072.25996E-056.631257636FBXW11//UBR5//SMURF1//UBE2D3//MDM2//HERC6//SMURF1

process1577570145864.9849624062.3594E-072.25996E-056.627198751UBE2C//MAD2L1//ANAPC11//PSMA3//P  
6E-056.618553467UBE2C//NPLOC4//PSMA8//UBE2S//MAD2L1//ANAPC11//PSMA3//PSMA6//PSMA7//PSMB5//P  
072.57942E-056.550135515UBE2C//PSMA8//ANAPC11//PSMA3//PSMA6//PSMA7//PSMB5//PSMC5//PSMD9//PS  
.170399UBE2C//NPLOC4//PSMA8//UBE2S//MAD2L1//ANAPC11//PSMA3//PSMA6//PSMA7//PSMB5//PSMC5//PSM  
3006075MDM2//UBR5//HERC6//SMURF1//SMURF2//USP16//UBE2C//PSMA8//CYLD//UBR2//PSMA3//PSMA6//PSI  
3006075ISG15//MDM2//UBR5//HERC6//SMURF1//SMURF2//USP16//UBE2C//PSMA8//CYLD//UBR2//PSMA3//PSM  
cycleBioloç process1471570145865.0458117125.09066E-074.23682E-056.293225897UBE2C//PSMA8//ANAPC11.  
673587MDM2//UBR5//HERC6//SMURF1//SMURF2//UBE2C//NPLOC4//PSMA8//UBE2S//MAD2L1//ANAPC11//PSM  
5869.83053E-077.82596E-056.007422964ISG15//MDM2//UBR5//HERC6//SMURF1//SMURF2//USP16//UBE2C//PS  
KIF23//SBDS//CCNB1//KIF11//NDC80//STMN1//SPC25  
//MAD2L1//NEK2//NUSAP1//PCNA//POLE2//RFC5//TOP2A//CHD1//BAZ1B//CENPA//OIP5//CENPI//H2BFM//H2AF  
>3516194ISG15//MDM2//UBR5//HERC6//SMURF1//SMURF2//PSMA8//PSMA3//PSMA6//PSMA7//PSMB5//USP16//L  
2//NCBP2//UPF3B//EIF4A3//ISG15//MDM2//UBR5//HERC6//SMURF1//SMURF2//LSM3//GTF2H3//HMGB2//CYCS//  
3305639SMURF1//UBE2C//MAD2L1//ANAPC11//PSMA3//PSMA6//PSMA7//PSMB5//PSMC5//PSMD9//PSMD11//PS  
RC1//KIF23//RPS14//RPS15//WIPI2//ATG12//PTTG2//PTTG1//NDC80//ZWINT//MAD2L1//NEK2//NUSAP1//SKA2//  
in cell cycle arrestBioloç process1261570145865.0339948233.4133E-060.0002083255.46682  
233.4133E-060.0002083255.466825313PSMA8//MDM2//TRIAP1//PSMA3//PSMA6//PSMA7//PSMB5//PSMC5//PSN  
233.4133E-060.0002083255.466825313PSMA8//MDM2//TRIAP1//PSMA3//PSMA6//PSMA7//PSMB5//PSMC5//PSN  
233.4133E-060.0002083255.466825313PSMA8//MDM2//TRIAP1//PSMA3//PSMA6//PSMA7//PSMB5//PSMC5//PSN  
5.0339948233.4133E-060.0002083255.466825313PSMA8//MDM2//TRIAP1//PSMA3//PSMA6//PSMA7//PSMB5//P  
233.4133E-060.0002083255.466825313PSMA8//MDM2//TRIAP1//PSMA3//PSMA6//PSMA7//PSMB5//PSMC5//PSN  
damage checkpoint process1261570145865.0339948233.4133E-060.0002083255.466825313PSMA8//MDM2//  
>1570145865.0339948233.4133E-060.0002083255.466825313PSMA8//MDM2//TRIAP1//PSMA3//PSMA6//PSMA7/  
02170365.441856342BRX1//PRC1//KIF23//RPS14//RPS15//WIPI2//ATG12//PTTG2//PTTG1//NDC80//ZWINT//MA  
569135.361540157UBE2C//PSMA8//ANAPC11//PSMA3//PSMA6//PSMA7//PSMB5//PSMC5//PSMD9//PSMD11//PS  
-060.0003977775.164737727PSMA8//MDM2//TRIAP1//PSMA3//PSMA6//PSMA7//PSMB5//PSMC5//PSMD9//PSMI  
/MAD2L1//ANAPC11//BUB1//CASC5//CCNB1//DYNC1LI1//BIRC5  
5//MDM2//UBR5//HERC6//SMURF1//SMURF2//PSMA8//PSMA3//PSMA6//PSMA7//PSMB5//USP16//UBE2C//CYLD  
4768274RAD51//CENPA//OIP5//CENPI//H2BFM//H2AFX//H2AFZ//HMGB2//NAP1L4//NPM1//H2AFJ//CASC5//CENF  
KPNA2//NDC80//CENPA//CCDC88A//KIF20A//KIF1B//KIF11//KIF18A//STMN1//UBE2C//ZWINT//CKS2//AURKA//SP  
-060.0004904935.034236862PSMA8//MDM2//TRIAP1//PSMA3//PSMA6//PSMA7//PSMB5//PSMC5//PSMD9//PSMI  
IA8//MDM2//TRIAP1//PSMA3//PSMA6//PSMA7//PSMB5//PSMC5//PSMD9//PSMD11//PSMD12//PSME1//WNT9A  
cycleBioloç process1267570145864.5831893179.48825E-060.0004963715.022814032MAD2L1//UBE2C//ANAPC1  
-050.0005505224.971685579PSMA8//ORC6//POLE2//MCM10//PSMA3//PSMA6//PSMA7//PSMB5//PSMC5//PSMD  
WIPI2//ATG12//DCP2//NCBP2//UPF3B//EIF4A3//ISG15//MDM2//UBR5//HERC6//SMURF1//SMURF2//LSM3//GTF2H  
>4.5157894741.11184E-050.0005577484.953957189PSMA8//MDM2//TRIAP1//PSMA3//PSMA6//PSMA7//PSMB5//F  
IPA//OIP5//CENPI//H2BFM//H2AFX//H2AFZ//HMGB2//NAP1L4//NPM1//H2AFJ//CASC5//CENPH//HIST2H2AC//H2A  
HNRNPA1//NXF1//SRSF10//NCBP2//GLE1//UPF3B//U2AF1//SRSF9//KPNA2//IPO11//RPL23//SMURF1//STRADA//  
>4.1069525671.41335E-050.0006810144.849748802PSMA8//MDM2//TRIAP1//PSMA3//PSMA6//PSMA7//PSMB5//F  
HNRNPA1//NXF1//SRSF10//NCBP2//GLE1//UPF3B//U2AF1//SRSF9//KPNA2//IPO11//RPL23//SMURF1//STRADA//  
-//UBE2C//MAD2L1//ANAPC11//BUB1//EGF//IGF1//IL1B//NUSAP1//DLGAP5//DYNC1LI1//NEK2//CDK11A  
>0664NEK2//CDK11A//CENPF//UBE2C//MAD2L1//ANAPC11//BUB1//EGF//IGF1//IL1B//NUSAP1//DLGAP5//DYNC1L  
D51//CENPA//OIP5//CENPI//H2BFM//H2AFX//H2AFZ//HMGB2//NAP1L4//NPM1//H2AFJ//CASC5//CENPH//HIST2H  
.5624.755277411UBE2C//MAD2L1//ANAPC11//PSMA3//PSMA6//PSMA7//PSMB5//PSMC5//PSMD9//PSMD11//PSM  
050.0007845624.755277411UBE2C//MAD2L1//ANAPC11//PSMA3//PSMA6//PSMA7//PSMB5//PSMC5//PSMD9//PS  
020054.7404631RPS14//RPS15//SRSF10//SMN2//SNRPD1//SNRPD2//NCBP2//RAD51//CENPA//OIP5//CENPI//H  
/CENPI//H2BFM//H2AFX//H2AFZ//HMGB2//NAP1L4//NPM1//H2AFJ//CASC5//CENPH//HIST2H2AC//H2AFV//BAZ1  
/CENPI//H2BFM//H2AFX//H2AFZ//HMGB2//NAP1L4//NPM1//H2AFJ//CASC5//CENPH//HIST2H2AC//H2AFV//NUSA  
ENPI//NPM1//CASC5//CENPH//H2BFM//H2AFX//H2AFZ//HMGB2//NAP1L4//H2AFJ//HIST2H2AC//H2AFV  
>YCP2//TRIM69//PSMA8//CTNNB1//EYA2//ALDOC//KIF1B//JMJD6//MAGI3//CKAP2//NGFRAP1//MAGEH1//UBQLN  
12420884.525083175UBE2C//PSMA8//ORC6//MAD2L1//MDM2//ANAPC11//MCM10//PSMA3//PSMA6//PSMA7//PS  
M69//PSMA8//CTNNB1//EYA2//ALDOC//KIF1B//JMJD6//MAGI3//CKAP2//NGFRAP1//MAGEH1//UBQLN1//HMGB2/  
323.28155E-050.0013352254.483921514PSMA8//PSMA3//PSMA6//PSMA7//PSMB5//PSMC5//PSMD9//PSMD11//F  
-050.0013418464.476974331PSMA8//PSMA3//PSMA6//PSMA7//PSMB5//PSMC5//PSMD9//PSMD11//PSMD12//PS

I6//SOD2//SYCP2//TRIM69//PSMA8//CTNNB1//EYA2//ALDOC//KIF1B//JMJD6//MAGI3//CKAP2//NGFRAP1//MAGEI  
I00410766CDKN3//CKS2//SERTAD1//BCCIP//CCNE2//EGF//TGFB1//IL1B//SOD1//SPRED2//FBXW11//UBR5//SM  
I0//ZWINT//MAD2L1//NEK2//NUSAP1//DLGAP5//KIF18A//CCNB1//TOP2A  
P2//NCBP2//UPF3B//EIF4A3//SRSF10//SMN2//SNRPD1//SNRPD2//LSM3//HNRNPM//SYNCRIP//HNRNPA1//HNRI  
CS//SOD1//FOX2L2//TPD52L1//CFDP1//HSPA1B//BIRC5//IGF1//IL1B//NPM1//TRIAP1//BCL2A1//BNIP1//YWHAZ//FI  
AFX//PSMA8//MDM2//TRIAP1//PSMA3//PSMA6//PSMA7//PSMB5//PSMC5//PSMD9//PSMD11//PSMD12//PSME1//N  
/CENPI//H2BFM//H2AFX//H2AFZ//HMGB2//NAP1L4//NPM1//H2AFJ//CASC5//CENPH//HIST2H2AC//H2AFV  
ZWINT//CKS2//HMGB2//IGF1//MDM2//PCNA//AURKA//TOP2A//AKT1S1  
I0//UBE2C//ZWINT//CKS2//HMGB2//IGF1//MDM2//PCNA//AURKA//TOP2A//AKT1S1  
I724.24843359MYC//FOX2L1//FOX2L2//FOX2L3  
A2//PRC1//KIF23//RPS14//RPS15//WIPI2//ATG12//IFNG//CENPF//EGF//ORC6//IGF1//PCNA//POLE2//MCM10//RFC  
I11984.133911194H2AFX//GTF2H3//RAD51AP1//RAD51//STRA13//RDM1//EYA2//UBE2T//NPM1//PCNA//POLE2//E  
A//OIP5//CENPI//NPM1//CASC5//CENPH//BAZ1B  
A1//NXF1//SRSF10//NCBP2//GLE1//UPF3B//U2AF1//SRSF9//SMURF1//STRADA//TXN//IL1B  
I36570145863.4652412288.89737E-050.0030713784.050738584PSMA8//MDM2//TRIAP1//PSMA3//PSMA6//PSMA7  
I30713784.047001348UBE2C//PSMA8//ORC6//MAD2L1//MDM2//ANAPC11//MCM10//PSMA3//PSMA6//PSMA7//PS  
NA2//CENPF//EGF//ORC6//IGF1//PCNA//POLE2//MCM10//RFC5//RRM2//PAPD5//TOP1//TOP2A//NAE1//GTF2H3//  
VA8//MDM2//TRIAP1//PSMA3//PSMA6//PSMA7//PSMB5//PSMC5//PSMD9//PSMD11//PSMD12//PSME1//FEM1B//H  
2//DCP2//NCBP2//UPF3B//EIF4A3//ISG15//MDM2//UBR5//HERC6//SMURF1//SMURF2//LSM3//GTF2H3//ALDOC//  
/NDC80//CENPA//YWHAZ//EGF//IGF1//ITGA2B//LAMP2//PPBP//SOD1//VEGFA//CALU//CD9//HNRNPA1//NXF1//SF  
I0940.0046082253.850966627PSMA8//ORC6//PCNA//POLE2//PSMA3//PSMA6//PSMA7//PSMB5//PSMC5//PSMD9  
I3160.0001425090.0046183013.846157645IL1B//PELI2//GH1//TGFB1//SBDS//EIF4A3//SMURF1//MDM2//CCNB1  
I36755CENPA//OIP5//CENPI//NPM1//CASC5//CENPH  
I8243.819666755CENPA//OIP5//CENPI//NPM1//CASC5//CENPH  
I36755CENPA//OIP5//CENPI//NPM1//CASC5//CENPH  
I234343.812176108UBE2C//MAD2L1//ANAPC11//PSMA3//PSMA6//PSMA7//PSMB5//PSMC5//PSMD9//PSMD11//PS  
I4928NUSAP1//DLGAP5//KIF18A//CCNB1//NDC80//ZWINT//MAD2L1//NEK2  
I3040.0001867880.0057300933.72865024PSMA8//MDM2//TRIAP1//PSMA3//PSMA6//PSMA7//PSMB5//PSMC5//PS  
I57300933.726375396RPS15//IFNG//NDC80//CENPA//YWHAZ//EGF//IGF1//ITGA2B//LAMP2//PPBP//SOD1//VEGFA  
I29F//UBE2C//MAD2L1//ANAPC11//BUB1//DYNC1LI1//CASC5  
I19453.715603624CENPF//UBE2C//MAD2L1//ANAPC11//BUB1//DYNC1LI1//CCNB1  
I660.0057649453.712049482FOX2L1//FOX2L2//FOX2L3//TWSG1  
RIX1//RPS14//RPS15//WIPI2//ATG12//SRSF10//SMN2//SNRPD1//SNRPD2//NCBP2//RAD51//CASC5//CENPA//OIP  
I9828445CENPA//OIP5//CENPI//H2BFM//H2AFX//H2AFZ//HMGB2//NAP1L4//NPM1//H2AFJ//CASC5//CENPH//HIST  
I3//PCNA//POLE2//PSMA3//PSMA6//PSMA7//PSMB5//PSMC5//PSMD9//PSMD11//PSMD12//PSME1//RFC5//SKP1  
I7294281BUB1//NEK2//CDK11A//CENPF//UBE2C//MAD2L1//ANAPC11//NPM1//CCL26//CTNNB1//SKA2//STMN1//R  
I96818CENPA//OIP5//CENPI//NPM1//CASC5//CENPH  
I96818IFNG//MYC//FOX2L1//FOX2L2//FOX2L3  
I392366RPS14//RPS15//SRSF10//SMN2//SNRPD1//SNRPD2//NCBP2//RAD51//CENPA//OIP5//CENPI//H2BFM//H2  
IPI2//ATG12//H2AFX//SOD1//SOD2//GTF2H3//RAD51AP1//RAD51//CLDN3//ALDOC//UBQLN1//IL1B//NPPC//SDC2  
I21790.0081057533.534351031HMGB2//CYCS//SOD1//FOX2L2//TPD52L1//BAZ1B//RPL27A//RPS7//RPS14//RPS15  
I966025RPS14//RPS15//SRSF10//SMN2//SNRPD1//SNRPD2//NCBP2//RAD51//CENPA//OIP5//CENPI//H2BFM//H2  
I44//TBK1//IFI35//IFNG//STMN1//PLSCR1//EIF2AK2//ISG15//TAC1//CLDN4//CRH//EPYC//IL1B//SOD1//STC1//STC2  
I81410.0083586063.511250724RPS14//RPS15//WIPI2//ATG12//SRSF10//SMN2//SNRPD1//SNRPD2//NCBP2//RAC  
I53090.0084901533.501263916IL1B//PELI2//GH1//TGFB1//SBDS//EIF4A3//SMURF1//MDM2//CCNB1//IFNG//IGF  
IENPI//NPM1//CASC5//CENPH  
I1C//UBE2S//UBE2T//ANAPC11//UBE2W//UBE2D3  
I1GB2//CYCS//SOD1//FOX2L2//TPD52L1//BAZ1B//RPL27A//RPS7//RPS14//RPS15//RPS24//RPL23//CTNNB1//MST4  
I05980.009170653.4551902IL1B//PELI2//GH1//TGFB1//SMURF1//CCNB1//IFNG//IGF1//ADNP//VEGFA//UBE2C//F  
I14//RPS15//WIPI2//ATG12//SRSF10//SMN2//SNRPD1//SNRPD2//NCBP2//RAD51//CASC5//CENPA//OIP5//CENPI//  
I620.0103531873.396355941NDC80//SGOL1//CASC5//CCNB1  
I23420.0110096443.364172802BDKRB1//CCNB1//NLRP12//SOCS1//UBE2C//MAD2L1//ANAPC11//PSMA3//PSMA6  
I2930.0110096443.363582589CDKN3//CKS2//SERTAD1//BCCIP//CCNE2//EGF//TGFB1//IL1B//SOD1//SPRED2//C  
I57457RPS15//NDC80//CENPA//DLGAP5//KIF18A//CCNB1//NUSAP1//KIF1B//RHOT1//BIRC5//CENPF

CDKN3//CKS2//SERTAD1//BCCIP//CCNE2//EGF//TGFB1//IL1B//SOD1//SPRED2//FBXW11//UBR5//SMURF1//UBE2431384WIP1//ATG12//H2AFX//GTF2H3//RAD51AP1//RAD51//STRA13//RDM1//EYA2//UBE2T//NPM1//PCNA//POPI2//ATG12//NPM1//HAUS2//CENPA//CENPF//KIF11  
P//UBE2C//MAD2L1//ANAPC11//BUB1//DLGAP5//STAG2  
V//CCNB1//BIRC5//CENPF  
00204DLGAP5//KIF18A//CCNB1//CENPF//BIRC5  
3021479CDKN3//CKS2//SERTAD1//BCCIP//CCNE2//EGF//TGFB1//IL1B//SOD1//SPRED2//AKT1S1//IFI27//NLRP3//H6//UBE2C//UBE2T//UBE2D2//UBE2D3//UBE2G2  
3045413.10142054CDKN3//CKS2//SERTAD1//BCCIP//CCNE2//EGF//TGFB1//IL1B//SOD1//SPRED2//CCDC88A//MARCH6//UBE2C//UBE2D2//UBE2D3//UBE2G2//FBXW11//UBR5//SMURF1  
S14//RPS15//SRSF10//SMN2//SNRPD1//SNRPD2//NCBP2//RAD51//CENPA//OIP5//CENPI//H2BFM//H2AFX//H2AF72490581B2M//CFDP1//IFI6//HSPA1B//BIRC5//IGF1//IL1B//NPM1//TRIAP1//BCL2A1//BNIP1//SOD1//YWHAZ//FEM1//SOD1//TGFB1//CCNB2  
10.0008889290.0204733173.051133006FOXD4L1//FOXD4//FOXD2//FOXD4L3  
EH1//RAD51//TOP1//POLE2//CCNE1//CCNE2//PCNA//RFC5//NAE1//STAG2//TOP2A  
32//CYCS//SOD1//FOXL2//TPD52L1//TOP2A  
2053.023055426CENPF//UBE2C//MAD2L1//ANAPC11//BUB1//DLGAP5//DYNC1LI1  
0653.012495559NPM1//CTNNB1//SKA2//STMN1//SBDS//CCNB1//DYNC1LI1//CYLD  
D4L1//FOXD4//FOXD2//FOXD4L3//TWG1//TOB1//SMURF1//SMAD5//SMURF2//UBE2D3  
90653.010193844SRSF10//SMN2//SNRPD1//SNRPD2//HNRNPM//NCBP2//SYNCRIP//LSM3//HNRNPA1//HNRNP845120.0217185713.006779001IL1B//PELI2//BAZ1B//MTDH//GH1//CTNNB1//DAB2IP//GABPB1//HMGB2//IGF1//T34208281CDKN3//CKS2//SERTAD1//BCCIP//CCNE2//EGF//TGFB1//IL1B//SOD1//SPRED2//AKT1S1//IFI27//NLRP1011//RPL23//TOB1//NLRP12//TXN//UBR5//EGF//DAB2IP//IL1B//CYLD//FBXW11//TGFB1//HNRNPA1  
770.024014862.955351574MAD2L1//DYNC1LI1//CENPF//UBE2C//ANAPC11//BUB1  
331522.947071051EGF//TGFB1//IL1B//SOD1//IFI27//NLRP12//CAP2//PRKACB//BDKRB1//DAB2IP//CYCS//GH1//PCNA2//WIP1//ATG12//CENPF//EGF//ORC6//IGF1//PCNA//POLE2//MCM10//RFC5//RRM2//PAPD5//TOP1//TOP2A  
OL1//CTNNB1//DYNC1LI1//NEK2//HAUS2  
140.0279331012.879553086CENPF//UBE2C//MAD2L1//ANAPC11//BUB1//DYNC1LI1  
M//CFDP1//IFI6//HSPA1B//BIRC5//IGF1//IL1B//NPM1//TRIAP1//BCL2A1//BNIP1//SOD1//YWHAZ//FEM1B//GCH1//T26892.854760708PTPN1//SOCS1//IFI6//HLA-B//IFI27//IFI35//OAS1//OAS2//ISG15  
380.0289926892.854760708IFI6//HLA-B//IFI27//IFI35//OAS1//OAS2//PTPN1//SOCS1//ISG15  
456579IFNG//KPNA2//IPO11//RPL23//TOB1//NLRP12//TXN//UBR5//EGF//DAB2IP//IL1B//CYLD//FBXW11//TGFB1  
9792.809957446IFI6//HLA-B//IFI27//IFI35//OAS1//OAS2//PTPN1//SOCS1//ISG15  
5258931EIF2AK2//NXF1//SYNCRIP//CENPA//MAGI3//GRB2//ANPEP//TBK1//HLA-B//HNRNPA1//HNRNPK//HSPA812751412.773466581B2M//CFDP1//IFI6//HSPA1B//BIRC5//IGF1//IL1B//NPM1//TRIAP1//BCL2A1//BNIP1//SOD1//YV650.0346729672.766048754HMGB2//CYCS//SOD1//FOXL2//TPD52L1//TOP2A//CTNNB1//MST4//STK24  
EH1//RAD51//TOP1//POLE2//CCNE1//CCNE2//PCNA//RFC5//ESCO2//CCDC88A//NAE1//STAG2//IGF1//CENPF//E2//SERTAD1//BCCIP//CCNE2//EGF//TGFB1//IL1B//SOD1//SPRED2//FBXW11//UBR5//SMURF1//UBE2D3//MDM2  
process17197570145862.2082286940.0018899370.037410532.723552751SRSF10//SMN2//SNRPD1//SNRPD2//F110532.723552751SRSF10//SMN2//SNRPD1//SNRPD2//HNRNPM//NCBP2//SRSF9//WBP4//JMJD6//SYNCRIP//LS2743512.711297563CDKN3//CKS2//SERTAD1//BCCIP//CCNE2//EGF//TGFB1//IL1B//SOD1//SPRED2//CCDC88A//IPO11//RPL23//SMURF1//STRADA//SDCBP//RTP4//TOMM5//YWHAZ//TOB1//NLRP12//TXN//UBR5//EGF//DAB2IP//IPO11//RPL23//TOMM5//YWHAZ//TOB1//NLRP12//TXN//UBR5//EGF//DAB2IP//IL1B//CYLD//FBXW11//HSP90AA1//388114282.698296915B2M//IL1B//PELI2//CCL26//HMGB2//VEGFA//IFNG//MYC//BDKRB1//EGF//BAZ1B//FEM1B//C54563HMGB2//CYCS//SOD1//FOXL2//TPD52L1  
10.0020523220.0389409432.687754563HMGB2//CYCS//SOD1//FOXL2//TPD52L1  
54563DLGAP5//EGF//IGF1//IL1B//NUSAP1  
19432.687754563EGF//IGF1//IL1B//NUSAP1//DLGAP5  
682058072KPNA2//CENPF//EGF//ORC6//IGF1//PCNA//POLE2//MCM10//RFC5//RRM2//PAPD5//TOP1//TOP2A//NA4892.664002003FOXD4L1//FOXD4//FOXD2//FOXD4L3//TWG1//TOB1//SMURF1  
2003NPM1//KIF11//SGOL1//CTNNB1//DYNC1LI1//HAUS2//NEK2  
5178NPM1//CTNNB1//SKA2//STMN1//SBDS//CCNB1//DYNC1LI1//CYLD  
0926FOXD4L1//FOXD4//FOXD2//FOXD4L3  
0926FOXD4L1//FOXD4//FOXD2//FOXD4L3

36382.65120926STC1//VEGFA//STC2//CCNB1  
0926STC1//VEGFA//STC2//CCNB1  
2//IPO11//RPL23//SMURF1//STRADA//SDCBP//RTP4//TOMM5//YWHAZ//NPM1//PCNA//SYTL2//STX17//RIMS2//C1  
B//NPM1//HNRNPA1//NXF1//SRSF10//NCBP2//GLE1//UPF3B//U2AF1//SRSF9//KPNA2//IPO11//RPL23//SMURF1//  
26077PRTFDC1//MAT2B//MAT2A//MCCC2//NUDT7//NUDT3  
26077CENPF//UBE2C//MAD2L1//ANAPC11//BUB1//DYNC1L1  
26077PRTFDC1//MAT2B//MAT2A//MCCC2//NUDT7//NUDT3  
35022.604626077CENPF//UBE2C//MAD2L1//ANAPC11//BUB1//DYNC1L1  
'OIP5//CENPI//NPM1//CASC5//CENPH//CHD1//BPTF  
38095IFNG//KPNA2//IPO11//RPL23//TOB1//NLRP12//TXN//UBR5//EGF//DAB2IP//IL1B//CYLD//FBXW11//TGFB1  
7434664NDUFA8//NDUFB2//NDUFB4//NDUFB9//NDUFS6//UQCRB//COX6A1//COX6C//ATP5G1//CYCS//COX7A2  
'SOD1//FOX4L1//FOX4//FOX2//FOX4L3  
I//UBE2C//BIRC5//UBE2S  
3702RPS14//RPS15//RPS7//RPS24  
4899642.526313541IL1B//PELI2//BAZ1B//MTDH//GH1//CTNNB1//DAB2IP//GABPB1//HMGB2//IGF1//TGFB1//AR  
VNB1//DYNC1L1//NEK2  
51//RRAGB//RRAGC//RHEBL1//CCDC88A  
6007622.506266572EGF//TGFB1//IL1B//SOD1//IFI27//NLRP12//CAP2//PRKACB//BDKRB1//DAB2IP//CYCS//GH1/  
3495789CTNNB1//EGF//SYT9//IFNG//IL1B//PRKACB//SLC2A1//DAB2IP//NLRP12//TGFB1//GH1//IGF1//INHBA//N  
2B//LAMP2//PPBP//SOD1//VEGFA//CALU//CD9  
7246327IFNG//KPNA2//IPO11//RPL23//TOMM5//YWHAZ//TOB1//NLRP12//TXN//UBR5//MDM2//EGF//DAB2IP//IL1E  
I2//SNRPD1//SNRPD2//BCAS2//HNRNPM//NCBP2//SYNCRIP//LSM3//HNRNPA1//HNRNPH3//HNRNPK//UPF3B//L  
CBP2//GLE1//UPF3B//U2AF1//SRSF9//HNRNPA1//EIF5A2//ENY2//EIF4A3  
9190292.352572598CTNNB1//BPTF//ZFPM2//SUZ12//FOSB//HSBP1//MDM2//NFX1//RPS14//TXN//MTDH//TCEAL  
62660.0729565272.350406167CTNNB1//BPTF//ZFPM2//SUZ12//FOSB//HSBP1//MDM2//NFX1//RPS14//TXN//MTC  
52052NME1//CMPK2//RRM2//NUDT7  
3RPS7//RPS14//RPS15//RPS24//RPL23//PUM2//NGDN//TACO1//EEF1E1//NCBP2//EIF5A2//SBDS//EIF4A3//CYLD//F  
//IPO11//RPL23//SMURF1//STRADA//SDCBP//RTP4//TOMM5//YWHAZ//NPM1//PCNA//SYTL2//STX17//RIMS2//TOI  
3DKN3//CKS2//SERTAD1//BCCIP//CCNE2//EGF//TGFB1//IL1B//SOD1//SPRED2//FBXW11//UBR5//SMURF1//UBI  
75385NXF1//SRSF10//NCBP2//GLE1//UPF3B//U2AF1//SRSF9//HNRNPA1  
1646425IFNG//KPNA2//IPO11//RPL23//SMURF1//STRADA//SDCBP//RTP4//TOMM5//YWHAZ//NPM1//PCNA//SYTL  
X1//RPS14//RPS15//SRSF10//SMN2//SNRPD1//SNRPD2//NCBP2//SBDS//RPS7//RPS24//UTP23//EIF4A3//SRSF9/  
0.0838322532.274164801CENPF//UBE2C//MAD2L1//ANAPC11//BUB1//STAG2//MDM2//DYNC1L1  
39470.0838322532.272951282CENPF//TOP2A//CEP152//BIRC5//HSP90AA1//NEK2//HAUS2//TPD52L1//PPM1D//  
10.005674430.0888023992.246077784CYLD//TBK1//UBE2D3//ATG12//ISG15  
HNRNPA1//NXF1//SRSF10//NCBP2//GLE1//UPF3B//U2AF1//SRSF9//KPNA2//IPO11//RPL23//SMURF1//STRADA//S  
TOP2A  
3352.236631206NDC80//CENPA//NUSAP1  
520.0901675422.232091151NLRP12//TXN//UBR5//EGF//DAB2IP//IL1B//CYLD//FBXW11//TGFB1  
3278257NLRP12//TXN//UBR5//EGF//DAB2IP//IL1B//CYLD//FBXW11//NCBP2//TGFB1  
80.0942839842.209069173FOX4L1//FOX4//FOX2//FOX4L3//CTNNB1//MYC  
4//RPS15//SRSF10//SMN2//SNRPD1//SNRPD2//NCBP2//SRSF9//NPM1  
510//NCBP2//SMN2//SNRPD1//SNRPD2  
83120.100039092.177942333PSMA8//PSMA3//PSMA6//PSMA7//PSMB5//PSMC5//PSMD9//PSMD11//PSMD12//P  
//MYC//FOX4L1//FOX4//FOX2//FOX4L3//DCN//JMJD6//TGFB1//CA2  
//CENPA//DLGAP5//KIF18A//CCNB1//NUSAP1//KIF1B//RHOT1//BIRC5//CENPF  
758872.128337998CTNNB1//TBK1//IL1B//MAP3K3//ZDHHC13//PPM1A//PELI2//BST2//MTDH//DAB2IP//C9ORF89  
NDC80//CENPA//CCDC88A//SDCBP//CTNNB1//STMN1//KIF18A//UBE2C//ZWINT//CKS2//KIF11//AURKA//SPC25//  
B1//MYC//FOX4L1//FOX4//FOX2//FOX4L3  
39544PRTFDC1//MAT2B//MAT2A  
DC1//MAT2B//MAT2A  
39544PRTFDC1//MAT2B//MAT2A  
URKC//PRC1//KIF23//KLHL21  
31987NXF1//GLE1//SRSF10//NCBP2//UPF3B//U2AF1//SRSF9

DC1//NME1//MAT2B//MAT2A/MCCC2//NUDT7//NUDT3  
380.1155379692.094453431BRX1//RPS14//RPS15//SRSF10//SMN2//SNRPD1//SNRPD2//NCBP2//SBDS//RPS7//  
4432.091700652EGF//IGF1//IL1B//NUSAP1//DLGAP5//BIRC5//MDM2//CCNB1  
05920.1214101472.069530233CTNNB1//BPTF//ZFPM2//SUZ12//FOSB//HSBP1//MDM2//NFX1//RPS14//TXN//MTC  
N//JMJD6//TGFB1//CA2//CTNNB1//IFNG//MYC//FOXD4L1//FOXD4//FOXD2//FOXD4L3  
A1//COX6C//NDUFA8//NDUFB2//NDUFB4//NDUFB9//NDUFS6//ATP5G1//CYCS//UQCRB//COX7A2L  
CENPA//OIP5//CENPI//H2BFM//H2AFX//H2AFZ//HMGB2//NAP1L4//NPM1//H2AFJ//CASC5//CENPH//HIST2H2AC/  
3830544TNNI3//TPM1//SOD2//GCH1//BDKRB1//NCF2//UTS2//HBB//NPPC//SOD1  
87191RPS14//RPS15//SRSF10//SMN2//SNRPD1//SNRPD2//NCBP2//SRSF9//NPM1  
//IFNG//IL1B//PRKACB//SLC2A1//INHBA//NMU//SLC30A8//GAL//FAM3B//PSMD9//SIRT4//CRH  
NPA1//NXF1//SRSF10//NCBP2//GLE1//UPF3B//U2AF1//SRSF9//EIF5A2//ENY2//EIF4A3  
1//SRSF10//NCBP2//GLE1//UPF3B//U2AF1//SRSF9//EIF5A2//ENY2//EIF4A3  
588469HNRNPA1//NXF1//SRSF10//NCBP2//GLE1//UPF3B//U2AF1//SRSF9//EIF5A2//ENY2//EIF4A3  
20.0093637480.1284271412.028550264BDKRB1//CCNB1//EIF4A3//NLRP12//SOCS1//UBE2C//MAD2L1//ANAPC  
N//JMJD6//TGFB1//CA2//CTNNB1//IFNG//FEM1B//HOXB13//MYC//FOXD4L1//FOXD4//FOXD2//FOXD4L3  
3TMN1//KIF18A  
/CASC5//CCNB1  
910.1297046862.016193771FOXD4L1//FOXD4//FOXD2//FOXD4L3  
93771CCNB1//JMJD6//SRSF10//CDK11A  
036330.1301637482.013065648IL1B//PELI2//BAZ1B//GH1//CTNNB1//DAB2IP//GABPB1//HMGB2//IGF1//TGFB1/  
5//RAD51//TOP2A  
<6A1//COX6C//NDUFA8//NDUFB2//NDUFB4//NDUFB9//NDUFS6//ATP5G1//CYCS//UQCRB//COX7A2L//TXN  
>3871.998705192UBE2C//BIRC5//KNTC1  
590.1316463871.998705192DAB2IP//C9ORF89//NLRP12  
05192NDC80//CENPA//NUSAP1  
/NUSAP1  
RP12//IL1B//CTNNB1//TBK1//MAP3K3//ZDHHC13//PPM1A//PELI2//BST2//MTDH//DAB2IP//C9ORF89//NKIRAS1//  
991376318PCNA//POLE2//RFC5//RRAGC//CDK11A//MORF4L2//SOD1//TNNI3//IFNG//YWHAZ//TPM1//SOD2//EGF  
3FXN1//HMGB2//JMJD6//BPGM//RPS24  
F1//SRSF10//NCBP2//GLE1//UPF3B//U2AF1//SRSF9//EIF5A2//ENY2//EIF4A3  
MN2//SNRPD1//SNRPD2  
process649570145863.1334049410.0116485730.1494037061.933727289TGFB1//FOXD4L1//FOXD4//FOXD2//F  
5861.1379091560.011668340.1494037061.932990936KPNA2//CENPF//EGF//ORC6//IGF1//PCNA//POLE2//MCM1  
4120.0120423310.1536551071.919289443HNRNPA1//NXF1//SRSF10//NCBP2//GLE1//UPF3B//U2AF1//SRSF9//V  
//PCNA//POLE2//RFC5//RAD51AP1//H2AFX//RAD51//TRIP13//HMGB2//RDM1//RAD51C//MND1  
'445881.904866029CCNB1//TRIP13//CASC5//TDRD6//GAPDHS//HMGB2//CD9//TGFB1//RPL27A//RPS7//RPS14  
79397INHBA//CRH//IL1B  
09264PRTFDC1//SOD1//CDO1//SDS//RRAGB//RRAGC//ALDOC//IL1B//CCNE1  
//CTNNB1//STAG2//RAD51C  
FNG//IL1B//PRKACB//SLC2A1//INHBA//NMU//SLC30A8//GAL//FAM3B//PSMD9//SIRT4//CRH  
19590.1724124231.858802454BDKRB1//CCNB1//EIF4A3//NLRP12//MAD2L1//SOCS1//UBE2C//ANAPC11//PSMA:  
://SNRPD1//SNRPD2//HNRNPM//NCBP2//SYNCRIP//LSM3//HNRNPA1//HNRNPH3//HNRNPK//UPF3B//U2AF1//SF  
50749GCH1//HBB//HSP90AA1//IFNG//IL1B//WASL  
>4591.852150749NLRP12//EGF//UBR5//IL1B//NCBP2//TGFB1  
>4591.852150749NCF2//SOD1//SOD2//NOX4//HBB//HP  
'491.842195348NLRP12//TXN//UBR5//EGF//DAB2IP//IL1B//CYLD//FBXW11//TGFB1  
>06149141.829843476SOD1//B2M//IL1B//PELI2//CCL26//HMGB2//VEGFA//IFNG//MYC//TBK1//BDKRB1//TPM1//C1  
>1AP1//H2AFX//RAD51//PCNA//POLE2//RFC5//HMGB2//SOD1//BAZ1B//TRIP13//STRA13//RDM1//EYA2//UBE2T//M  
944045SYT9//IFNG//IL1B//PRKACB//SLC2A1//NLRP12//INHBA//NMU//RAB3A//SLC30A8//PSMD9//TXN//UBR5//EC  
>1//STC2  
DHS//PRKACB//TPI1  
26397HSP90AA1//WASL//GCH1//IFNG//IL1B  
PM1  
'NOX4//SOD1

M1//ESCO2//UBE2C//GGCX//UBE2S//UBE2T//MAN2A1//UBE2W//EIF5A2//UBE2D2//UBE2D3//UBE2G2//B4GALT4  
3//KPNA2//IPO11//RPL23//SMURF1//STRADA//SDCBP//RTP4//TOMM5//YWHAZ//NPM1//PCNA//SYTL2//STX17//R  
3248713NLRP12//TXN//UBR5//EGF//DAB2IP//IL1B//CYLD//FBXW11//NCBP2//TGFB1  
117570145862.1871345030.0162836320.1917384611.788248713TGFB1//SMURF2//SMURF1//FOXD4L1//FOXD  
DC1//ERH//NME1//MAT2B//MAT2A//MCCC2//NUDT7//NUDT3  
//KPNA2//IPO11//RPL23//SMURF1//STRADA//SDCBP//RTP4//TOMM5//YWHAZ//NPM1//PCNA//SYTL2//STX17//RII  
DKN3//CKS2//SERTAD1//BCCIP//CCNE2//EGF//TGFB1//IL1B//SOD1//SPRED2//CCDC88A//SOCS1//BDKRB1//C  
DKN3//CKS2//SERTAD1//BCCIP//CCNE2//EGF//TGFB1//IL1B//SOD1//SPRED2//CCDC88A//SOCS1//BDKRB1//C  
30154FOXD4L1//FOXD4//FOXD2//FOXD4L3  
30154TXN//IL1B//SMURF1//STRADA  
50.0174148540.1974402371.759080154ARPP19//IGF1//GAPDHS//IFNG  
4//FOXD2//FOXD4L3  
30154CLDN4//NCF2//SOCS1//CCNE1  
50.0174148540.1974402371.759080154HBB//HSP90AA1//IFNG//IL1B  
540.1974402371.759080154ARPP19//IGF1//GAPDHS//IFNG  
4L1//FOXD4//FOXD2//FOXD4L3  
IPF//CTNNB1//GCLM//IFNG//IL1B//MAT2A//MYC//NCF2//NME1//NPPC//GAL//B2M//ABCD3//SOD1//TOP1//YWHAZ  
966771.726736822EGF//TGFB1//GH1//IGF1//PPM1A//FOXD4L1//FOXD4//FOXD2//FOXD4L3//TWSG1//VEGFA//  
CENPA//NMU//FOXD4L1//FOXD4//FOXD2//FOXD4L3//YWHAZ//VEGFA//EGF//IGF1//ITGA2B//LAMP2//PPBP//SOC  
9011.720887957GCH1//IFNG//IL1B  
A//CCNB1//CENPF  
37957BUB1//CCNB1//CTNNB1  
3591471.705039698EGF//DAB2IP//TGFB1//GH1//IGF1//PPM1A//FOXD4L1//FOXD4//FOXD2//FOXD4L3//TWSG1/  
37821.701845158NDUFA8//NDUFB2//NDUFB4//NDUFB9//NDUFS6//UQCRB  
320.2191467821.701845158NDUFA8//NDUFB2//NDUFB4//NDUFB9//NDUFS6//UQCRB  
2039617BAZ1B//RPL27A//RPS7//RPS14//RPS15//RPS24//RPL23//STMN1//KIF18A//SBDS//CCNB1//EIF5A2  
40338STMN1//KIF18A//SKA2//SBDS//CCNB1  
362071EGF//DAB2IP//TGFB1//GH1//IGF1//PPM1A//FOXD4L1//FOXD4//FOXD2//FOXD4L3//TWSG1//VEGFA//RR  
30381.666702578NLRP12//UBR5//EGF//IL1B//NCBP2//TGFB1  
32578TOB1//TWSG1//CTNNB1//IGF1//JUND//NPPC  
32578HSP90AA1//WASL//GCH1//HP//IFNG//IL1B  
//PTPN1//SOCS1//HLA-B//OAS1//OAS2//B2M  
Z1B//RPL27A//RPS7//RPS14//RPS15//RPS24//RPL23//STMN1//KIF18A//SBDS//CCNB1//EIF5A2  
RPS15//IFNG//NDC80//CENPA//NMU//YWHAZ//EGF//IGF1//ITGA2B//LAMP2//PPBP//SOD1//VEGFA//CALU//CD9//  
JG//KPNA2//IPO11//RPL23//SMURF1//STRADA//SDCBP//RTP4//TOMM5//YWHAZ//TOB1//NLRP12//TXN//UBR5//E  
3521381.649050991KPNA2//ESCO2//PCNA//CCDC88A//NAE1//MYC//STAG2//H2AFX//IGF1//NPPC//RAD51  
//SOD2//NCF2//NOX4  
//CRH//IL1B  
//IFNG//OAS1//OAS2//B2M//PTPN1//SOCS1//GCH1  
IMJD6//BPGM//RPS14//SFXN1  
37871.63245963DAB2IP//CYLD//FBXW11//TXN//DPH3//NLRP12  
3AD51//UBR2//SGOL1//STAG2//H2AFX//NEK2//MND1  
37350.245393081.629787984TRIP13//TOP2A//STAG2//H2AFX//NEK2//RAD51//MND1//SYCP2//UBR2//SGOL1  
31160.2465654441.626479013SOD1//TPM1//NPPC//NMU//IL1B//CRH//IFNG//AKIRIN2//GH1//CA2//PANX1//NLRP  
321981.616944826SOD1//INHBA//RPS14//SFXN1//RPS24//CCNB2//HMGB2//JMJD6//BPGM  
5240169RPL27A//RPS7//RPS14//RPS15//RPS24//RPL23//GCH1//MDM2//PARD6B//CCNB1//WASL//REPS2//KNTC  
3116816UBE2C//UBE2S//IL1B//MYC//CA2//HMGB2//INHBA//BDKRB1//GCLM//IFI6//SLC30A8  
1608771.608381286CENPF//UBE2C//MAD2L1//ANAPC11//BUB1//NPM1//STMN1//SBDS//CCNB1//DYNC1LI1  
590.257914331.597808126NLRP12//IL1B//CYLD//FBXW11  
3126NLRP12//IL1B//CYLD//FBXW11  
3126FOXD4L1//FOXD4//FOXD2//FOXD4L3  
680.257914331.595940367NDUFA8//NDUFB2//NDUFB4//NDUFB9//NDUFS6  
3367HBB//HSP90AA1//IFNG//IL1B//GCH1  
313//TOP2A//STAG2//H2AFX//NEK2//RAD51//MND1//SYCP2//UBR2//SGOL1



5490.0265335170.2677385351.576205189SMAD5//SMURF1//SMURF2//TGFB1//UBE2D3//GDF15//TOB1//FOXO  
35351.571434934CTNNB1//EGF//SMURF1  
34934EGF//UBR5//DAB2IP  
650.2677385351.571434934EGF//UBR5//DAB2IP  
35351.571434934GCLM//IFI6//SOD1  
159639RPL27A//RPS7//RPS14//RPS15//RPS24//RPL23//STMN1//KIF18A//SBDS//CCNB1//EIF5A2  
159639SYT9//IFNG//IL1B//PRKACB//SLC2A1//INHBA//NMU//SLC30A8//PSMD9//SIRT4//CRH  
GGCX//GRB2//HBB//IGF1//ITGA2B//ITGAM//KIF11//RHOB//LAMP2//PPBP//PRKACB//PTPN1//RAB5A//RAD51C//S  
70.0277176660.2743299841.557243338NLRP12//EGF//UBR5//IL1B//TGFB1  
VASEH1//MRPL12//TOMM5//YWHAZ//NDUFA4//LETM1//HSP90AA1//MAN2A1//RAB3A  
640.2766764721.548874508DCP2//NCBP2//UPF3B//EIF4A3  
4L1//FOXO4//FOXO2//FOXO4L3  
4721.548874508CTNNB1//IGF1//JUND//NPPC  
L27A//RPS7//RPS14//RPS15//RPS24//RPL23//STMN1//KIF18A//SBDS//CCNB1//EIF5A2  
5//SBDS//RPS7//RPS24//UTP23//EIF4A3//NPM1//SDAD1//BRIX1  
1//CENPI//INHBA//SOD1//FOXO2  
690.292726221.519764915SOD1//SOD2//HBB//HP//TPM1  
9861.504734458PCNA//POLE2//RFC5  
9861.504734458NME1//RRM2//TXN  
2//CTNNB1//HSD17B3  
10.0312799130.2993559861.504734458IL1B//PTPN1//SOCS1  
ALDOC//GAPDHS//PRKACB//TPI1//ARPP19  
340.2993559861.502069663EIF5A2//MAT2B//MAT2A//GCLM  
9861.502069663SAT1//SMS//ASMT//GCH1  
488130364SOD1//SOD2//TAS2R14//RTP4//CLDN3//ALDOC//UBQLN1//IL1B//NPPC//SDC2//VEGFA//PRTFDC1//B2  
45709HLA-B//IFNG//OAS1//OAS2//B2M//PTPN1//SOCS1  
18811.483447985NLRP12//EGF//UBR5//IL1B//TGFB1  
17814645310.0328512590.3085218811.483447985MDM2//UBR5//HERC6//SMURF1//SMURF2  
//CTNNB1//WNT9A//FOXO4L1//FOXO4//FOXO2//FOXO4L3//LUM  
38280.3123829091.476854317MTDH//DCN//GCH1//IL1B//NCF2//AKIRIN2//BDKRB1//SOCS1//CMPK2//HMGB2//B  
2//NDUFB4//NDUFB9//NDUFS6//UQCRB  
510.3131089341.47363033MTDH//MDM2//GAPDHS//IGF1//IFNG//IL1B  
81521.471308857SPRED2//AKT1S1//SSTR2//TFPI//CAST//TNNT3//DAB2IP//IFI6//BIRC5//IL1B//HP//UBE2C//MAD  
L1B//PRKACB//SLC2A1//SLC30A8//PSMD9//SIRT4//GAL//FAM3B  
MKK2//MAP3K3//EGF//TGFB1//IL1B//SOD1//SPRED2//PSMA8//MDM2//TRIAP1//PSMA3//PSMA6//PSMA7//PSMI  
4261.457249457DAB2IP//CYLD//FBXW11//TXN  
61512551.449409493KPN2//CENPF//EGF//ORC6//IGF1//PCNA//POLE2//MCM10//RFC5//RRM2//PAPD5//TOP1//  
39294SOD1//FOXO4L1//FOXO4//FOXO2//FOXO4L3  
780.3261512551.448239294CYLD//TBK1//UBE2D3//ATG12//ISG15  
RF1//TOB1//TWSG1//CTNNB1//IGF1//JUND//NPPC//RSAD2  
cycleBiolog process319570145864.0404432130.0360949360.3262575711.442553725PCNA//RRM2//CCNE1  
  
75711.442553725IFNG//PTPN1//SOCS1  
75711.442553725IFNG//PTPN1//SOCS1  
441060383KPN2//CENPF//EGF//ORC6//IGF1//PCNA//POLE2//MCM10//RFC5//RRM2//PAPD5//TOP1//TOP2A//NA  
7A//RPS7//RPS14//RPS15//RPS24//RPL23//TOP2A//NCBP2//GTF2H3//PSMA8//ZNF483//B2M//PSMA3//PSMA6//F  
F1//ITGA2B//RHOB//LAMP2//PLSCR1//PPBP//SOD1//VEGFA//YWHAZ//CALU//CD9//ZFPM2//GGCX//GRB2//HBB//  
H3//HMGB2//CYCS//SOD1//FOXO2//TPD52L1  
R1//INHBA//CCNB1//NCF2//PCNA  
4857IL1B//INHBA//SIRT4//PSMD9//DPH3//NLRP12//EGF  
PNA2//CENPF//EGF//ORC6//IGF1//PCNA//POLE2//MCM10//RFC5//RRM2//PAPD5//TOP1//TOP2A//NAE1//CDKN3/  
2//YWHAZ//CTNNB1//EGF//CCL26//NUDT3//GRB2//IL1B//INHBA//CCL7//SSTR2//STC1//BST2//TAC1//TNFAIP6//T  
56941.397585088EIF2AK2//DAB2IP//IFNG//GAL//ABI1//TOB1//CDKN3//BTG3//CTNNB1//HSPA1B//IL1B//INHBA//  
2//HBB//IGF1//ITGA2B//ITGAM//KIF11//RHOB//LAMP2//PPBP//PRKACB//PTPN1//RAB5A//RAD51C//SLC16A1//SO

2//HBB//IGF1//ITGA2B//ITGAM//KIF11//RHOB//LAMP2//PPBP//PRKACB//PTPN1//RAB5A//RAD51C//SLC16A1//SO  
79135SSTR2//CTNNB1//GH1//IL1B//AURKA//SOCS1//CCNE1  
73611.384397475AKT1S1//RRAGB//RRAGC  
650.3606673611.384397475INHBA//LAG3//NLRP12  
441.380950903HMGB2//CYCS//SOD1//FOXL2//TPD52L1  
3//ALDOC//GAPDHS//PRKACB//TPI1//ARPP19//GCH1//SPTLC1  
75921546PRTFDC1//SOD1//B2M//HSPA1B//HSPA6//HSPA8//HSP90AA1//BAIAP2//GRB2//PPM1A//STRADA//MAT:  
30.0423589570.3650994371.373054738IFNG//GH1//SOCS1//IGF1  
570.3650994371.373054738DAB2IP//CYLD//FBXW11//TXN  
7DH//CMPK2//HMGB2//DCN//GCH1//IL1B//NCF2//AKIRIN2//BDKRB1//SOCS1  
E2C//PSMA8//ORC6//MAD2L1//MDM2//ANAPC11//MCM10//PSMA3//PSMA6//PSMA7//PSMB5//PSMC5//PSMD9//F  
4990.0430464380.3691710881.366062784BAZ1B//CTNNB1//DAB2IP//GABPB1//HMGB2//IGF1//IL1B//ADNP//NPP  
3C//GAPDHS//BPGM//TPI1//KIF1B//DHDH//IGF1//NUDT3  
948611CDO1//SOD1//TPST1//GCLM//SMS//MAT2B//MAT2A//CTNNB1//DCN//IMPAD1  
4490331.350638859EGF//ZFPM2//GGCX//GRB2//HBB//IGF1//ITGA2B//ITGAM//KIF11//RHOB//LAMP2//PPBP//PRK  
4//PPP3CA//PTPN1//PPM1D//CDC14A//EYA2//DUSP14//PPP6R3//IMPA1//IFNG  
31//EIF5A2//MAT2B//MAT2A//SAT1//SMS//GCLM//ASMT//GCH1  
BI1//IFNG//SOCS1//IGF1//EGF//ADNP//VEGFA  
1//CD9//SOD1//FOXD4L1//FOXD4//FOXD2//FOXD4L3  
14494CTHRC1//HMGB2//NME1//TXN//IL1B//RHEBL1//NPM1//PSMA6//MTDH//DPH3  
4//FOXD2//FOXD4L3//CTNNB1//HNRNPAB//DAB2IP//MYC  
249NAE1//POLE2//CCNE1//CCNE2  
249FOXD4L1//FOXD4//FOXD2//FOXD4L3  
60.386198351.333455249STMN1//SBDS//CCNB1//SKA2  
60.386198351.333455249HBB//HSP90AA1//IFNG//IL1B  
RIM23  
3YCP2  
660.3867829651.329847275ARPP19//IGF1//GAPDHS  
44402PRTFDC1//SOD1//CDO1//SDS//RRAGB//RRAGC

PSMA6//PSMA7//PSMB5//PSMC5//PSMD9//PSMD11//PSMD12//PSME1//RRM2//SKP1//CCNB1//CCNE1//CCNE2//P  
0//PSMA3//PSMA6//PSMA7//PSMB5//PSMC5//PSMD9//PSMD11//PSMD12//PSME1//RFC5//CCNB1//CCNB2//CCN  
3//PSMA6//PSMA7//PSMB5//PSMC5//PSMD9//PSMD11//PSMD12//PSME1//RFC5//CCNB1//CCNB2//CCNE2//H2AF  
PSMA3//PSMA6//PSMA7//PSMB5//PSMC5//PSMD9//PSMD11//PSMD12//PSME1//RRM2//SKP1//CCNB1//CCNE1//C  
A2//CASC5//SPC25//CENPH//BUB1//KIF18A//KNTC1//DLGAP5//CCNB1//TRIP13//TOP2A//UBE2C//CKS2//KIF11//  
//PSMD9//PSMD11//PSMD12//PSME1//RFC5//CCNB1//CCNB2//CCNE2//H2AFX//CDKN3//CKS2//SERTAD1//BCCI  
5//PSMC5//PSMD9//PSMD11//PSMD12//PSME1//RFC5//CCNB1//CCNB2//CCNE2//H2AFX//TRIAP1//BUB1//NEK2/  
//CENPI//BIRC5//CASC5//SPC25//CENPH//BUB1//KIF18A//CCNB1//KNTC1//USP16//UBE2C//OIP5//CDCA2//KIF11  
2//UBE2C//ZWINT//OIP5//CKS2//SGOL1//CDCA2//SEN5//UBE2S//SKA2//KIF11//MAD2L1//NEK2//DYNC1LI1//ANAP  
12//PSME1//NEK2//CDK11A//ZWINT//MAD2L1//BUB1//KNTC1//CENPF//UBE2C//ANAPC11//BIRC5//NAE1//WNT9  
BUB1//KIF18A//CCNB1//KNTC1//USP16//UBE2C//OIP5//CDCA2//KIF11//DYNC1LI1//ANAPC11//TXNL4B//HAUS2//P  
A//CCNB1//KNTC1//DLGAP5//CDK11A//UBE2C//ANAPC11//KIF11//EGF//IGF1//IL1B//USP16//OIP5//CDCA2//DYN  
WINT//MAD2L1//BUB1//KNTC1//CENPF//UBE2C//ANAPC11//NAE1//WNT9A//BIRC5//TOP2A//CASC5//CCNB1//DY  
B1//KIF18A//CCNB1//KNTC1//USP16//UBE2C//OIP5//CDCA2//KIF11//DYNC1LI1//ANAPC11//TXNL4B//HAUS2//PE  
35//PSMC5//PSMD9//PSMD11//PSMD12//PSME1//RFC5//CCNB1//CCNB2//CCNE2//H2AFX//TRIAP1//ZWINT//BUE  
SMD11//PSMD12//PSME1//RFC5//CCNB1//CCNB2//CCNE2//H2AFX//TRIAP1//ZWINT//BUB1//KNTC1//CENPF//NA  
//CENPF//UBE2C//MAD2L1//ANAPC11//BUB1//NAE1//WNT9A//TOP2A//CCNB1//DYNC1LI1//ZWINT//KNTC1  
B5//PSMC5//PSMD9//PSMD11//PSMD12//PSME1//RFC5//CCNB1//CCNB2//CCNE2//H2AFX//TRIAP1//CDKN3//SE  
PSMB5//PSMC5//PSMD9//PSMD11//PSMD12//PSME1//SKP1//AURKA//CCNB1//PTTG1  
P//CTNNB1//BIRC5//SKA2//SPC25//CENPH//PTTG1  
11//PSMD12//PSME1//UBE2C//BIRC5//EGF//IGF1//IL1B//NUSAP1//DLGAP5  
12//PSME1//PSMA8//SKP1//CCNB1//FEM1B//UBE2S  
MD9//PSMD11//PSMD12//PSME1//RRM2//SKP1//CCNB1//CCNE1//CCNE2//PSMA8//RFC5//CENPF//KPNA2//CEF  
NB1//KNTC1  
3B2//CYCS//SOD1//FOX2//TPD52L1//RNASEH1//HSPA1B//PSMA8//PSMA3//PSMA6//PSMA7//PSMB5//USP16//L  
KP1//CCNB1//CCNE1//CCNE2//PSMA8//RFC5//CENPF//KPNA2//CEP152//BIRC5//HSP90AA1//NEK2//HAUS2//TPI  
PSMA6//PSMA7//PSMB5//PSMC5//PSMD9//PSMD11//PSMD12//PSME1//SKP1//CCNB1//CCNE2  
DC88A//CENPF//STAG2//SGOL1//CENPI//BIRC5//CASC5//SPC25//CENPH//BUB1//KIF18A//CCNB1//KNTC1//PCN  
MD12//PSME1//PSMA8//SKP1//CCNB1//UBE2S//FEM1B  
1//PSMD12//PSME1//SKP1//CCNB1//UBE2S  
2L1//NEK2//NUSAP1//SKA2//CENPA//CCDC88A//CENPF//STAG2//SGOL1//CENPI//BIRC5//CASC5//SPC25//CEN  
G2//PTTG1//NDC80//ZWINT//MAD2L1//NEK2//NUSAP1//SKA2//CENPA//CCDC88A//CENPF//STAG2//SGOL1//CE  
ANAPC11//PSMA3//PSMA6//PSMA7//PSMB5//PSMC5//PSMD9//PSMD11//PSMD12//PSME1//PSMA8//SKP1//CCNE  
//CTNNB1//SKA2//NUSAP1//SBDS//CCNB1//DYNC1LI1//HAUS2//NEK2//CYLD//CCDC88A  
ARCH6//UBE2C//DCAF4//TRIM23//ANAPC11//PCNP//SKP1//UBE2D2//KLHL21//UBE2W//SUZ12//NAE1//UBQLN1//  
F2//FEM1B//DCAF7//MARCH6//UBE2C//DCAF4//TRIM23//ANAPC11//PCNP//SKP1//UBE2D2//KLHL21//UBE2W//S

SMA6//PSMA7//PSMB5//PSMC5//PSMD9//PSMD11//PSMD12//PSME1//PSMA8//SKP1//CCNB1  
SMC5//PSMD9//PSMD11//PSMD12//PSME1//SKP1//AURKA//CCNB1//PTTG1//FBXW11//MDM2//PCNP//SMURF1//  
AD11//PSMD12//PSME1//SKP1//CCNB1//UBE2S  
ID9//PSMD11//PSMD12//PSME1//SKP1//AURKA//CCNB1//PTTG1//FBXW11//MDM2//PCNP//SMURF1//UBE2D3  
VA7//PSMD9//SKP1//UBE2D2//UBE2D3//UBE2G2//USP13//NPLOC4//UBE2S//MAD2L1//ANAPC11//PSMB5//PSMC  
A6//PSMA7//PSMD9//SKP1//UBE2D2//UBE2D3//UBE2G2//USP13//NPLOC4//UBE2S//MAD2L1//ANAPC11//PSMB5  
//PSMA3//PSMA6//PSMA7//PSMB5//PSMC5//PSMD9//PSMD11//PSMD12//PSME1//SKP1//CCNB1  
A3//PSMA6//PSMA7//PSMB5//PSMC5//PSMD9//PSMD11//PSMD12//PSME1//SKP1//AURKA//CCNB1//PTTG1//FB  
MA8//CYLD//UBR2//PSMA3//PSMA6//PSMA7//PSMD9//SKP1//UBE2D2//UBE2D3//UBE2G2//USP13//NPLOC4//UE

C//H2AFZ//HMGB2//NAP1L4//NPM1//H2AFJ//CASC5//CENPH//HIST2H2AC//H2AFV//EZH2//BPTF//STAG2//RAD51  
JBE2C//CYLD//UBR2//PSMD9//SKP1//UBE2D2//UBE2D3//UBE2G2//USP13//NPLOC4//UBE2S//MAD2L1//ANAPC1  
SOD1//FOXO2//TPD52L1//RNASEH1//HSPA1B//PSMA8//PSMA3//PSMA6//PSMA7//PSMB5//USP16//UBE2C//CYL  
MD12//PSME1//PSMA8//SKP1//CCNB1//FEM1B//UBE2S//UBQLN1  
CENPA//CCDC88A//CENPF//STAG2//SGOL1//CENPI//BIRC5//CASC5//SPC25//CENPH//BUB1//KIF18A//CCNB1//K  
25313PSMA8//MDM2//TRIAP1//PSMA3//PSMA6//PSMA7//PSMB5//PSMC5//PSMD9//PSMD11//PSMD12//PSME1  
ID9//PSMD11//PSMD12//PSME1  
ID9//PSMD11//PSMD12//PSME1  
ID9//PSMD11//PSMD12//PSME1  
SMC5//PSMD9//PSMD11//PSMD12//PSME1  
ID9//PSMD11//PSMD12//PSME1  
TRIAP1//PSMA3//PSMA6//PSMA7//PSMB5//PSMC5//PSMD9//PSMD11//PSMD12//PSME1  
PSMB5//PSMC5//PSMD9//PSMD11//PSMD12//PSME1  
J2L1//NEK2//NUSAP1//SKA2//CENPA//CCDC88A//CENPF//STAG2//SGOL1//CENPI//BIRC5//CASC5//SPC25//CEN  
MD12//PSME1//SKP1//CCNB1//UBE2S//SMURF1  
J11//PSMD12//PSME1

//UBR2//PSMD9//SKP1//UBE2D2//UBE2D3//UBE2G2//USP13//NPLOC4//UBE2S//MAD2L1//ANAPC11//PSMC5//P  
H//HIST2H2AC//H2AFV//BAZ1B//CENPF  
C25//NPM1//SGOL1//CASC5//CTNNB1//SKA2//NUSAP1//SBDS//CCNB1//DYNC1LI1//RHOT1//HAUS2//NEK2//CYL  
J11//PSMD12//PSME1//WNT9A

1//PSMA3//PSMA6//PSMA7//PSMB5//PSMC5//PSMD9//PSMD11//PSMD12//PSME1  
9//PSMD11//PSMD12//PSME1  
3//IDH3A//RAB31//GCH1//NKIRAS1//TRIM23//RHOB//RAB22A//RAB3A//RAB5A//RRAGC//RAB7L1//RAB33A//KIF11  
SMC5//PSMD9//PSMD11//PSMD12//PSME1  
FV//TOP1//TOP2A//RAD51//NUSAP1//CCNB1  
TOB1//NLRP12//TXN//UBR5//EGF//DAB2IP//IL1B//CYLD//FBXW11//TGFB1//NPM1  
SMC5//PSMD9//PSMD11//PSMD12//PSME1//WNT9A  
NPM1//TOB1//NLRP12//TXN//UBR5//EGF//DAB2IP//IL1B//CYLD//FBXW11//TGFB1

I1  
2AC//H2AFV//CENPF  
AD12//PSME1  
MD11//PSMD12//PSME1  
2BFM//H2AFX//H2AFZ//HMGB2//NAP1L4//NPM1//H2AFJ//CASC5//CENPH//HIST2H2AC//H2AFV//BAZ1B//SRSF9//  
B  
P1//TOP2A//CCNB1

1//HMGB2//BIRC5//IL1B//RHOB//TRIAP1//WWOX//MST4//FAM3B//CYCS//RHOT1//PSMA3//PSMA6//PSMA7//PSM  
MB5//PSMC5//PSMD9//PSMD11//PSMD12//PSME1//RFC5//CCNB1//CCNB2//CCNE2//H2AFX//CTNNB1//BPTF//Z  
BIRC5//IL1B//RHOB//TRIAP1//WWOX//MST4//FAM3B//CYCS//RHOT1//PSMA3//PSMA6//PSMA7//PSMB5//PSMC5  
SMD12//PSME1  
SME1//PRTFDC1

H1//UBQLN1//HMGB2//BIRC5//IL1B//RHOB//TRIAP1//WVVOX//MST4//FAM3B//CYCS//RHOT1//PSMA3//PSMA6//P  
URF1//UBE2D3//ISG15//MDM2//HERC6//SMURF2//CCDC88A//SOCS1//BDKRB1//CCNB1//PELI2//CCT7//DNAJC

NPH3//HNRNPK//U2AF1//SRSF9//GTF2H3//BCAS2//WBP4//SNRNP48//JMJD6//SREK1IP1//TXNL4B//HSPA1B//CC  
EM1B//GCH1//TFPT//INHBA//WVVOX//IFI27//NLRP12//CTNNB1//MST4//STK24//RHOB//NGFRAP1//CRH//PSMA8//  
JAE1//FEM1B

C5//RRM2//PAPD5//TOP1//TOP2A//NAE1//NDC80//SGOL1//BIRC5//SKA2//NEK2//CASC5//SPC25//CENPH//PTTG  
3CCIP//RAD51C//RFC5//TOP2A//UBE2D3//PTTG1//MORF4L2//HMGB2//SOD1//BAZ1B//TRIP13//PSMA8//MDM2//T

7//PSMB5//PSMC5//PSMD9//PSMD11//PSMD12//PSME1//EEF1E1  
3MB5//PSMC5//PSMD9//PSMD11//PSMD12//PSME1//RFC5//CCNB1//CCNB2//CCNE2//H2AFX//CTNNB1//BPTF//Z  
RAD51AP1//H2AFX//RAD51//RNASEH1//HMGB2//CCNE1//CCNE2//ESCO2//CCDC88A//STRA13//RDM1//EYA2//L  
42AFX  
GAPDHS//BPGM//TPI1//IDH3A//RAB31//GCH1//NKIRAS1//TRIM23//RHOB//RAB22A//RAB3A//RAB5A//RRAGC//R  
RSF10//NCBP2//GLE1//UPF3B//U2AF1//SRSF9//KPNA2//IPO11//RPL23//SMURF1//STRADA//SDCBP//RTP4//TOM  
//PSMD11//PSMD12//PSME1//RFC5//SKP1  
//IFNG//IGF1//FBXW11//EIF5A2//ADNP//VEGFA//UBE2C//PSMA8//ANAPC11//PSMA3//PSMA6//PSMA7//PSMB5//P

3MD12//PSME1

MD9//PSMD11//PSMD12//PSME1//EEF1E1//GRB2  
//CALU//CD9//HNRNPA1//NXF1//SRSF10//NCBP2//GLE1//UPF3B//U2AF1//SRSF9//KPNA2//IPO11//RPL23//SMUR

5//CENPI//H2BFM//H2AFX//H2AFZ//HMGB2//NAP1L4//NPM1//H2AFJ//CENPH//HIST2H2AC//H2AFV//SBDS//RPS  
2H2AC//H2AFV//BAZ1B//CHD1

AB3A//MYC//CCDC88A//CCNB1//SBDS//EGF//IGF1//IL1B//NUSAP1//DLGAP5//DYNC1LI1//TPM1//CYLD

AFX//H2AFZ//HMGB2//NAP1L4//NPM1//H2AFJ//CASC5//CENPH//HIST2H2AC//H2AFV//SRSF9//UBE2C//UBE2S//C  
2//VEGFA//TBK1//PELI2//YWHAZ//HSPA1B//HSPA6//HSPA8//HSP90AA1//HLA-B//HP//INHBA//CAMLG//PPBP//EGF  
5//RPS24//RPL23//CTNNB1//MST4//STK24//STMN1//KIF18A//TOP2A//SBDS//CCNB1//EIF5A2  
AFX//H2AFZ//HMGB2//NAP1L4//NPM1//H2AFJ//CASC5//CENPH//HIST2H2AC//H2AFV//BAZ1B//SRSF9//RPL27A//  
2//PLA2G4C//PPM1D//WASL//MTDH//DCN//GCH1//NCF2//AKIRIN2//BDKRB1//SOCS1//NXF1//SYNCRIP//CENPA//  
51//CASC5//CENPA//OIP5//CENPI//H2BFM//H2AFX//H2AFZ//HMGB2//NAP1L4//NPM1//H2AFJ//CENPH//HIST2H2  
1//FBXW11//EIF5A2//ADNP//VEGFA//UBE2C//PSMA8//ANAPC11//PSMA3//PSMA6//PSMA7//PSMB5//PSMC5//PSM

//STK24//STMN1//KIF18A//TOP2A//SBDS//CCNB1//EIF5A2  
PSMA8//ANAPC11//PSMA3//PSMA6//PSMA7//PSMB5//PSMC5//PSMD9//PSMD11//PSMD12//PSME1//SKP1//UBE2  
/H2BFM//H2AFX//H2AFZ//HMGB2//NAP1L4//NPM1//H2AFJ//CENPH//HIST2H2AC//H2AFV//SRSF9//GCH1//MDM2

6//PSMA7//PSMB5//PSMC5//PSMD9//PSMD11//PSMD12//PSME1  
CCDC88A//SOCS1//BDKRB1//CCNB1//PELI2//PUM2//NGDN//TACO1//RPS14//NCBP2//EIF4H//EIF5A2//AKT1S1//C

Ξ2D3//MDM2//HERC6//SMURF2//CCDC88A//SOCS1//BDKRB1//CCNB1//PELI2//EIF5A2//FEM1B//DCAF7//MARCH  
LE2//BCCIP//RAD51C//RFC5//TOP2A//UBE2D3//PTTG1//MORF4L2//HMGB2//SOD1//BAZ1B//TRIP13//UBR5//PSM

12//CAP2//SSTR2//PRKACB//BDKRB1//DAB2IP//CYCS//GH1//TFPI//CAST//NPM1//HMGB2//PCNA//ADNP//STRAC  
SOCS1//BDKRB1//CCNB1//PELI2//AKT1S1//DAB2IP//GH1//ADNP//UBQLN1//SMURF1//NLRP12//STRADA//IFNG//  
=Z//HMGB2//NAP1L4//NPM1//H2AFJ//CASC5//CENPH//HIST2H2AC//H2AFV//SRSF9//GCH1//MDM2//PARD6B//CC  
1B//GCH1//TFPT//INHBA//WFOX//FOXL2//TPD52L1//IFI27//NLRP12//NGFRAP1//CRH//CYCS//HBB//HP//PSMA8//

'H3//HNRNPK//UPF3B//U2AF1//SRSF9//EIF4A3//WBP4//JMJD6//BCAS2  
GFBR1//ARPP19//SBDS//EIF4A3//ADNP//NPPC//SMURF1//CCNB1//MDM2//IFNG//EGF//SDCBP//BPTF//FBXW11//  
P12//CAP2//SSTR2//PRKACB//BDKRB1//DAB2IP//CYCS//GH1//TFPI//CAST//NPM1//HMGB2//PCNA//CYLD//ADNP

'HMGB2//PCNA//CTHRC1//ADNP//STRADA//CCDC88A//TPM1//CCL26//GCLM//FOXL2//NME1//TXN//TPD52L1//G  
//NAE1//CDKN3//CKS2//SERTAD1//BCCIP//CCNE2//CCNE1//CDO1//CTNNB1//BPTF//ZFPM2//SUZ12//FOSB//HSE

'FPT//INHBA//WFOX//FOXL2//TPD52L1//IFI27//NLRP12//NGFRAP1//CRH//CYCS//IFNG//CTNNB1//DAB2IP//GAL

//SUN1//MDM2

//SP110//TRIM23//KPNA2//MDM2//NFX1//NPM1//PSMA3//PSMA7//PSMB5//BUB1//TOP1//EIF4H//PDCL3//ISG15  
VHAZ//FEM1B//GCH1//TFPT//INHBA//WFOX//FOXL2//TPD52L1//IFI27//NLRP12//NGFRAP1//CRH//CYCS//PSMA8

ΞGF//ORC6//MCM10//RRM2//PAPD5

://HERC6//SMURF2//CCDC88A//SOCS1//BDKRB1//CCNB1//PELI2//EIF5A2//FEM1B//DCAF7//MARCH6//UBE2C//C  
-HNRNPM//NCBP2//SYNCRIP//LSM3//HNRNPA1//HNRNPH3//HNRNPK//UPF3B//U2AF1//SRSF9//EIF4A3//WBP4//L  
;M3//HNRNPA1//HNRNPH3//HNRNPK//UPF3B//U2AF1//EIF4A3  
/'SOCS1//BDKRB1//CCNB1//PELI2//PUM2//NGDN//TACO1//RPS14//NCBP2//EIF4H//EIF5A2//AKT1S1//DAB2IP//GI  
P//IL1B//CYLD//FBXW11//HSP90AA1//SEC61G//TGFB1  
/'TGFB1  
ΞCH1//TFPT//INHBA//WFOX//BNIP1//FOXL2//TPD52L1//PSMA8//MDM2//TRIAP1//PSMA3//PSMA6//PSMA7//PSM

\AE1//CDKN3//CKS2//SERTAD1//BCCIP//CCNE2//CCNE1//CTNNB1//BPTF//ZFPM2//SUZ12//FOSB//HSBP1//MDM2

ΓNNB1//TOB1//NLRP12//NDC80//SGOL1//CASC5//KIF20A//CENPF//RAB31//SNF8//CHMP4B//CHCHD4//VPS13B//  
'STRADA//SDCBP//RTP4//TOMM5//YWHAZ//PCNA//SYTL2//STX17//RIMS2//CTNNB1//TOB1//NLRP12//NDC80//S

!PP19//SBDS//EIF4A3//ADNP//NPPC//SMURF1//CCNB1//MDM2//IFNG//EGF//SDCBP//BPTF//FBXW11//HNRNPAB

//HMGB2//PCNA//ADNP//STRADA//CCDC88A//TPM1//CCL26//GCLM//FOXL2//TPD52L1//GCH1//UBE2C//PSMA8//  
IMU//PPM1A//HMGXB4//WWOX//SMURF1//FOXD4L1//FOXD4//FOXD2//FOXD4L3//TWSG1//TOB1//VEGFA//RAB3

3//CYLD//FBXW11//HSP90AA1//SEC61G//TGFB1//CENPA//SUN1  
J2AF1//SRSF9//EIF4A3//WBP4//JMJD6//SNRNP48//SREK1IP1//TXNL4B//RRAGC

.1//BDKRB1//CCNB1//SIRT4//DAB2IP//FOXD4L1//FOXD4//FOXD2//FOXD4L3//IFNG//FOXL2//WNT9A//ADNP//TBK  
)H//TCEAL1//BDKRB1//CCNB1//SIRT4//DAB2IP//FOXD4L1//FOXD4//FOXD2//FOXD4L3//IFNG//FOXL2//WNT9A//A

RPL7L1//GTF2H3//ASMT//MRPS7//MRPS23//BRX1//MRPL47//MRPL12//MRPS25//SECISBP2//MRPL33  
B1//NLRP12//TXN//UBR5//EGF//DAB2IP//IL1B//CYLD//FBXW11//HSP90AA1//SEC61G//DPH3//PANX1//TGFB1//K  
E2D3//ISG15//MDM2//HERC6//SMURF2//CCDC88A//SOCS1//BDKRB1//CCNB1//PELI2//CCT7//DNAJC21//HSPA8/

.2//STX17//RIMS2//TOB1//NLRP12//KIF20A//CENPF//RAB31//SNF8//CHMP4B//CHCHD4//VPS13B//SEC22A//GLE  
'NPM1//SDAD1

CCNB1//CCNB2

3SDCBP//RTP4//TOMM5//YWHAZ//HSP90AA1//NPM1//PCNA//SYTL2//STX17//RIMS2//SEC22A//TRAPPC2//GOSR'

SME1//ARPP19//STRADA

//NLRP12  
NPM1//ABI1//WASL//SGOL1//CASC5//CCL26//SKA2//NUSAP1//SBDS//CCNB1//TPM1//DYNC1L1//HAUS2//NEK2/

RPS24//UTP23//EIF4A3//SRSF9//NPM1//SDAD1

0H//TCEAL1//BDKRB1//CCNB1//SIRT4//DAB2IP//FOXD4L1//FOXD4//FOXD2//FOXD4L3//IFNG//FOXL2//WNT9A//C

/H2AFV//BPTF//USP16//EYA2//EZH2//KDM2A//JMJD6//SUZ12//ING3//ENY2//HIRA//MORF4L2//CCNB1//POLE4

11//PSMA3//PSMA6//PSMA7//PSMB5//PSMC5//PSMD9//PSMD11//PSMD12//PSME1

'/SBDS//EIF4A3//SMURF1//CCNB1//MDM2//IFNG//BPTF//FBXW11//HNRNPAB//PSMC5//TBK1//H2AFX//GAPDHS/

\ZI2

-//ZFPM2//GGCX//GRB2//HBB//IGF1//ITGA2B//ITGAM//KIF11//RHOB//LAMP2//PPBP//PRKACB//PTPN1//RAB5A//F

'OXD4L3//TWSG1

0//RFC5//RRM2//PAPD5//TOP1//TOP2A//NAE1//CCNE1//CTNNB1//BPTF//ZFPM2//SUZ12//FOSB//HSBP1//MDM2  
JAC3//EIF5A2//ENY2//EIF4A3

//RPS15//RPS24//RPL23//VMO1//CENPI//INHBA//SOX3//CTNNB1//NCBP2//GTF2H3//FEM1B//HOXB13

3//PSMA6//PSMA7//PSMB5//PSMC5//PSMD9//PSMD11//PSMD12//PSME1

{SF9//EIF4A3//GTF2H3//CCNB1//WBP4//JMJD6//CDK11A//BCAS2//SNRNP48//SREK1IP1//TXNL4B

TNNB1//EGF//BAZ1B//FEM1B//GCH1//TFPT//INHBA//WFOX//BNIP1//FOXL2//TPD52L1//CD55//PSMA8//MDM2//TI  
JPM1//BCCIP//RAD51C//TOP2A//UBE2D3//PTTG1//MORF4L2

3F//DAB2IP//CYLD//FBXW11//SIRT4//NCBP2//DPH3//PANX1//CRH//CCNB1//TGFB1//CTNNB1



‡  
MS2//TOB1//NLRP12//TXN//UBR5//CTNNB1//MDM2//EGF//DAB2IP//IL1B//CYLD//FBXW11//HSP90AA1//SEC61G  
4//FOXD2//FOXD4L3//TWSG1//TOB1//INHBA

MS2//TOB1//NLRP12//TXN//UBR5//CTNNB1//MDM2//RRAGB//RRAGC//EGF//DAB2IP//IL1B//CYLD//FBXW11//HSF  
CNB1//PELI2//UQCRB//NDUFA8//NDUFB2//NDUFB4//NDUFB9//NDUFS6//NME1//CAMKK2//TP53RK//TBK1//MST  
CNB1//PELI2//UQCRB//NDUFA8//NDUFB2//NDUFB4//NDUFB9//NDUFS6//NME1//CAMKK2//TP53RK//TBK1//MST

//SOCS1//CCNB1//CCNE1  
RRAGB//RRAGC//IL1B//IFNG//CTNNB1//TBK1//MAP3K3//ZDHHC13//PELI2//BST2//MTDH//EEF1E1//WNT9A//SDC  
1//CALU//CD9//BDKRB1//SLC6A6//KIF20A//VAMP5//SEC22A//SYTL2//STX17//TRAPPC2//BNIP1//GOSR1//TPD52

//VEGFA//RRAGB//RRAGC//IFNG//IL1B//CTNNB1//TBK1//MAP3K3//ZDHHC13//PELI2//BST2//MTDH//EEF1E1//WN

AGB//RRAGC//IFNG//IL1B//CTNNB1//TBK1//MAP3K3//ZDHHC13//PELI2//BST2//MTDH//EEF1E1//WNT9A//SDCBF

SLC6A6//KIF20A//VAMP5//SEC22A//SYTL2//STX17//TRAPPC2//BNIP1//GOSR1//TPD52//CA2//HNRNPA1//NXF1//E  
GF//DAB2IP//IL1B//CYLD//FBXW11//HSP90AA1//SEC61G//TGFB1//NPM1//PCNA//SYTL2//STX17//RIMS2

12//CCNB1//INHBA//CTNNB1//MYC//FOXD4L1//FOXD4//FOXD2//FOXD4L3

1//STMN1//KIF18A//UBE2C//UBE2S//CCL26//NDUFAF4//PANX1//HSP90AA1//STOM//RAD51//SBDS//POMP//PSM

4L1//FOXD4//FOXD2//FOXD4L3//TWSG1//INHBA

SLC16A1//SOD1//TFPI//VEGFA//YWHAZ//TFPI2//CALU//KIF18A//CD9//KIF23//PLSCR1//CCNB1//DCN//IL1B//SDC2

TM//HSPA1B//HSPA6//HSPA8//HSP90AA1//GCLM//MAT2B//MAT2A//CCL26//CMTM8//KAL1//PPBP//CMTM6//CCL7

2M

2L1//ANAPC11//PSMA3//PSMA6//PSMA7//PSMB5//PSMC5//PSMD9//PSMD11//PSMD12//PSME1

35//PSMC5//PSMD9//PSMD11//PSMD12//PSME1//SSTR2//PRKACB//STK3//NKIRAS1//TBK1//AZI2//CRKL//DAB2IP

TOP2A//NAE1//CCNE1//CDO1//CTNNB1//BPTF//ZFPM2//SUZ12//FOSB//HSBP1//MDM2//NFX1//RPS14//TXN//MT

AE1//CCNE1//CTNNB1//BPTF//ZFPM2//SUZ12//FOSB//HSBP1//MDM2//NFX1//RPS14//TXN//MTDH//TCEAL1//DCP

PSMA7//PSMB5//PSMC5//PSMD9//PSMD11//PSMD12//PSME1//ZNF287//SKP1

ITGAM//KIF11//PRKACB//PTPN1//RAB5A//RAD51C//SLC16A1//TFPI2//KIF18A//KIF23

CKS2//SERTAD1//BCCIP//CCNE2//CCNE1//CTNNB1//BPTF//ZFPM2//SUZ12//FOSB//HSBP1//MDM2//NFX1//RPS

KN//WNT9A//STC2//GDF15//ISG15//DLGAP5//UTS2//CRH//PANX1//HSPA8//MDM2//PRKACB//RAB3A//SDCBP//KII

ME1//NPM1//NPPC//NOX4//RARRES3//SOD2//SSTR2//WNT9A//PPM1D//CD9//EEF1E1

D1//TFPI//VEGFA//YWHAZ//TFPI2//CALU//KIF18A//CD9//KIF23//PLSCR1

D1//TFPI//VEGFA/YWHAZ//TFPI2//CALU//KIF18A//CD9//KIF23//PLSCR1

2A//ADNP//SLC30A8//NCF2//CDO1//ALDOC//IL1B//CCNE1//LUM//STC1//IFI6//HLA-B//IFI27//IFI35//IFNG//OAS1//O

'SMD11//PSMD12//PSME1//RFC5//CCNB1//CCNB2//CCNE2//H2AFX//CDKN3//CKS2//SERTAD1//BCCIP//PCNA//R  
C//CCNB1//BPTF//FBXW11//HNRNPAB//PSMC5//HBB//HSP90AA1//IFNG//H2AFX//USP16//PPM1A//ENY2//MRPL1

ACB//PTPN1//RAB5A//RAD51C//SLC16A1//SOD1//TFPI//VEGFA/YWHAZ//TFPI2//CALU//KIF18A//CD9//KIF23//CC

SMA8//RFC5//CENPF//KPNA2//CEP152//BIRC5//HSP90AA1//HAUS2//TPD52L1//PPM1D//CCNB2//KIF20A//CENP/IE2//H2AFX//CDKN3//INHBA//PCNA//POLE2//RRM2//SKP1//CCNE1//CENPF//CEP152//BIRC5//HSP90AA1//HAUSFX//CDKN3//CKS2//SERTAD1//BCCIP//INHBA//PCNA//POLE2//RRM2//SKP1//CCNE1//CENPF//CEP152//BIRC5//HCCNE2//PSMA8//RFC5//CENPF//CEP152//BIRC5//HSP90AA1//HAUS2//TPD52L1//PPM1D//CCNB2//KIF20A//CENFAURKA//STMN1//USP16//OIP5//CDCA2//DYNC1LI1//ANAPC11//TXNL4B//HAUS2//PBK//PAPD5//DYNLT3//CDK11/P//TRIAP1//SESN3//IFNG//INHBA//MYC//PPM1A//RPRM//STRADA//BUB1//NEK2//CDK11A//ZWINT//KNTC1//CENI/CDK11A//ZWINT//KNTC1//CENPF//NPM1//BIRC5//NAE1//WNT9A//STAG2//SBDS//EGF//IGF1//IL1B//NUSAP1//DL//DYNC1LI1//ANAPC11//TXNL4B//HAUS2//PBK//PAPD5//AURKA//DYNLT3//CDK11A//FAM83D//CCNB2//PTTG1//KAPC11//HAUS2//CASC5//SPC25//PAPD5//CENPH//AURKA//BUB1//DYNLT3//FAM83D//PARD6B//CDC14A//CCNB1.A//SBDS//CCNB1//EGF//IGF1//IL1B//NUSAP1//DLGAP5//BTG3//TOP2A//DYNC1LI1//CYLD//RPRM//DYNLT3'BK//PAPD5//AURKA//DYNLT3//CDK11A//FAM83D//CCNB2//PTTG1//KIF23//KLHL21//DLGAP5//EGF//IGF1//IL1BC1LI1//TXNL4B//HAUS2//PBK//PAPD5//AURKA//DYNLT3//FAM83D//CCNB2//PTTG1//KIF23//KLHL21'NC1LI1//FEM1B//ORC6//MCM10//RFC5//CCNB2//CCNE2}K//PAPD5//AURKA//DYNLT3//CDK11A//FAM83D//CCNB2//PTTG1//KIF23//KLHL21//DLGAP5//EGF//IGF1//IL1B}1//KNTC1//CENPF//NAE1//WNT9A//BIRC5//TOP2A//CASC5//DYNC1LI1//FEM1B\AE1//WNT9A//BIRC5//TOP2A//CASC5//CDKN3//SESN3//IFNG//INHBA//MYC//PPM1A//RPRM//STRADA

SN3//IFNG//INHBA//MYC//PPM1A//RPRM//STRADA//ZWINT//BUB1//KNTC1//CENPF//NAE1//WNT9A//BIRC5//BTG

'152//BIRC5//HSP90AA1//NEK2//HAUS2//TPD52L1//PPM1D//CCNB2//MDM2//WNT9A//TOP2A

JBE2C//CYLD//UBR2//PSMD9//SKP1//UBE2D2//UBE2D3//UBE2G2//USP13//NPLOC4//UBE2S//MAD2L1//ANAPC1D52L1//PPM1D//CCNB2//MDM2//WNT9A//TOP2A

JA//POLE2//RFC5//TOP2A//IFI6//SOD2//CHD1//BAZ1B//OIP5//H2BFM//H2AFX//H2AFZ//HMGB2//NAP1L4//NPM1//I

PH//BUB1//KIF18A//CCNB1//KNTC1//SRSF10//SMN2//SNRPD1//SNRPD2//NCBP2//PCNA//POLE2//RFC5//RAD51NPI//BIRC5//CASC5//SPC25//CENPH//BUB1//KIF18A//CCNB1//KNTC1//SRSF10//SMN2//SNRPD1//SNRPD2//NCE

31//FEM1B//MARCH6//UBE2D2//UBE2G2//DCAF7//DCAF4//TRIM23//PCNP//KLHL21

'UBE2S//UBE2T//MAD2L1//PSMA3//PSMA6//PSMA7//PSMB5//PSMC5//PSMD9//PSMD11//PSMD12//PSME1//PSM;UZ12//USP16//ENY2//NAE1//UBQLN1//UBE2S//UBE2T//MAD2L1//PSMA3//PSMA6//PSMA7//PSMB5//PSMC5//PS

UBE2D3

35//PSMD11//PSMD12//PSME1//AURKA//CCNB1//PTTG1//FBXW11//PCNP//ISG15  
5//PSMC5//PSMD11//PSMD12//PSME1//AURKA//CCNB1//PTTG1//FBXW11//PCNP

IXW11//PCNP//UBE2D3//USP16//CYLD//UBR2//UBE2D2//UBE2G2//USP13  
3E2S//MAD2L1//ANAPC11//PSMB5//PSMC5//PSMD11//PSMD12//PSME1//AURKA//CCNB1//PTTG1//FBXW11//PCNP

C//BUB1//DLGAP5//KIF18A//CCNB1//SYCP2//USP16//EYA2//KDM2A//JMJD6//SUZ12//ING3//ENY2//HIRA//MORF4  
1//PSMC5//PSMD11//PSMD12//PSME1//AURKA//CCNB1//PTTG1//FBXW11//PCNP  
D//UBR2//PSMD9//SKP1//UBE2D2//UBE2D3//UBE2G2//USP13//NGLY1//PSMC5//NPLOC4//UBE2S//MAD2L1//ANAPC11

INTC1//SRSF10//SMN2//SNRPD1//SNRPD2//NCBP2//PCNA//POLE2//RFC5//RAD51//TOP2A//CAP2//NOX4//RRAGC

IPH//BUB1//KIF18A//CCNB1//KNTC1//SRSF10//SMN2//SNRPD1//SNRPD2//NCBP2//PCNA//POLE2//RFC5//RAD51

SMD11//PSMD12//PSME1//AURKA//CCNB1//PTTG1//FBXW11//PCNP//IFNG//IL1B

LD

3//PSMC5//HMGB2//CYCS//SOD1//FOXO2//TPD52L1//RNASEH1//HSPA1B//PSMA8//PSMA3//PSMA6//PSMA7//PSMA9

/RPL27A//RPS7//RPS24//RPL23//STMN1//KIF18A//ABI1//WASL//UBE2C//UBE2S//CCL26//NDUFAF4//HSP90AA1//HSP90AB1

IB5//PSMC5//PSMD9//PSMD11//PSMD12//PSME1//RRAGC//BNIP1//BUB1//CDK11A//UBE2D3//PDCL3//SLTM//STK24//SOD1//  
FPM2//SUZ12//FOSB//HSBP1//NFX1//RPS14//TXN//MTDH//TCEAL1//BDKRB1//NME1//IFNG//SIRT4//CFDP1//IFI6//  
5//PSMD9//PSMD11//PSMD12//PSME1//RRAGC//BNIP1//BUB1//CDK11A//UBE2D3//PDCL3//SLTM//STK24//SOD1//

3MA7//PSMB5//PSMC5//PSMD9//PSMD11//PSMD12//PSME1//RRAGC//BNIP1//BUB1//CDK11A//UBE2D3//PDCL3/  
21//HSPA8//NKTR//FKBP14//DNAJA4//HSPA1B//HSP90AA1//EIF5A2//FEM1B//DCAF7//MARCH6//UBE2C//DCAF4/  
NB1//CDK11A//PAPD5//PSMA8//HSPA8//PSMA3//PSMA6//PSMA7//PSMB5//PSMC5//PSMD9//PSMD11//PSMD12/  
NME1//PSMA3//PSMA6//PSMA7//PSMB5//PSMC5//PSMD9//PSMD11//PSMD12//PSME1//BEX2//NAE1//TOP2A//IF

1//PTTG2//ZWINT//MAD2L1//NUSAP1//UBE2C//PSMA8//MDM2//ANAPC11//PSMA3//PSMA6//PSMA7//PSMB5//PSI  
RIAP1//PSMA3//PSMA6//PSMA7//PSMB5//PSMC5//PSMD9//PSMD11//PSMD12//PSME1//GRB2//EEF1E1//FEM1E

FPM2//SUZ12//FOSB//HSBP1//NFX1//RPS14//TXN//MTDH//TCEAL1//BDKRB1//NME1//IFNG//SIRT4//CFDP1//IFI6/  
JBE2T//NPM1//BCCIP//RAD51C//UBE2D3//PTTG1//MORF4L2//SOD1//BAZ1B//TRIP13//CYCS//FOXL2//TPD52L1//

AB7L1//RAB33A//KIF1B//PSMC5//HMGB2//CYCS//SOD1//FOXL2//TPD52L1//RNASEH1//HSPA1B//PSMA8//PSMA3  
M5//HSP90AA1//NPM1//PCNA//SYTL2//STX17//RIMS2//SEC22A//TRAPPC2//GOSR1//HSPA8//CTNNB1//DLGAP5/  
SMC5//PSMD9//PSMD11//PSMD12//PSME1//SKP1//UBE2S

R1//STRADA//SDCBP//RTP4//TOMM5//HSP90AA1//NPM1//PCNA//SYTL2//STX17//RIMS2//SEC22A//TRAPPC2//C

7//RPS24//UTP23//EIF4A3//SRSF9//GCH1//MDM2//PARD6B//CCNB1//WASL//REPS2//KNTC1//SDCBP//SYCP2//U

CCL26//STMN1//NDUFAF4//HSP90AA1//POMP//PSMG1//CENPF//PSMD9  
ZFP2//GGCX//GRB2//HBB//IGF1//ITGA2B//ITGAM//KIF11//RHOB//LAMP2//PRKACB//PTPN1//RAB5A//RAD51C

RPS7//RPS24//RPL23//GCH1//MDM2//PARD6B//CCNB1//WASL//REPS2//KNTC1//STMN1//KIF18A//ABI1//UBE2C/  
MAGI3//GRB2//ANPEP//HLA-B//HNRNPA1//HNRNPK//HSPA8//SP110//TRIM23//KPNA2//MDM2//NFX1//NPM1//PSI  
AC//H2AFV//SRSF9//SDCBP//PARD6B//SYCP2//UBE2C//UBE2S//CCDC88A//VMO1//CCL26//CD9//STMN1//NDUF  
AD9//PSMD11//PSMD12//PSME1//SKP1//UBE2S

S  
//PARD6B//CCNB1//WASL//REPS2//KNTC1//SDCBP//SYCP2//UBE2C//UBE2S//CCDC88A//VMO1//CCL26//CD9//S

AB2IP//GH1//ADNP//SBDS//EIF4A3//UBQLN1//SMURF1//NLRP12//STRADA//MDM2//IFNG//PRKACB//IGF1//TPD

I6//UBE2C//DCAF4//TRIM23//ANAPC11//PCNP//SKP1//UBE2D2//KLHL21//CAMKK2//TP53RK//TBK1//MST4//SNR1  
A8//MDM2//TRIAP1//PSMA3//PSMA6//PSMA7//PSMB5//PSMC5//PSMD9//PSMD11//PSMD12//PSME1//CRKL//DA

)A//CCDC88A//ACAP2//TBC1D2B//TNNI3//TPM1//CCL26//GCLM//IFI6//BIRC5//FOX2//NGFRAP1//TPD52L1//PPP  
'PRKACB//IGF1//TPD52L1//CAMKK2//VEGFA//UBE2C//MAD2L1//ANAPC11//PSMA3//PSMA6//PSMA7//PSMB5//P  
NB1//WASL//REPS2//KNTC1//UBE2C//UBE2S//CCL26//STMN1//NDUFAF4//PANX1//HSP90AA1//STOM//POMP//F  
'NME1//MST4//PSMA3//PSMA6//PSMA7//PSMB5//PSMC5//PSMD9//PSMD11//PSMD12//PSME1//BEX2//NAE1//IF

'HNRNPAB//PSMC5//TBK1//HBB//HSP90AA1//H2AFX//GAPDHS//USP16//PPM1A//ENY2//MRPL12//FOX2//CCNE  
//CTHRC1//STRADA//CCDC88A//ACAP2//TBC1D2B//TNNI3//TPM1//CCL26//GCLM//IFI6//BIRC5//FOX2//NGFRAI

CH1//RHEBL1//NPM1//PSMA6//MTDH//DPH3//UBE2C//PSMA8//ANAPC11//PSMA3//PSMA7//PSMB5//PSMC5//PS  
3P1//MDM2//NFX1//RPS14//TXN//MTDH//TCEAL1//DCP2//NCBP2//UPF3B//EIF4A3//TGFR1//IL1B//SOD1//SPREI

//ING3//STK3//TOP2A//EEF1E1//MAD2L1//MDM2//SOD2//VEGFA//MTDH//ADNP//GCLM//NCF2//AKT1S1//TGFR1

3//NME1//MST4//PSMA3//PSMA6//PSMA7//PSMB5//PSMC5//PSMD9//PSMD11//PSMD12//PSME1//BEX2//NAE1//IF

)CAF4//TRIM23//ANAPC11//PCNP//SKP1//UBE2D2//KLHL21//GGCX//UBE2S//CAMKK2//TP53RK//TBK1//MST4//SI  
JMJD6

H1//ADNP//SBDS//EIF4A3//UBQLN1//SMURF1//NLRP12//STRADA//MDM2//IFNG//PRKACB//MAD2L1//IGF1//TPD

B5//PSMC5//PSMD9//PSMD11//PSMD12//PSME1//SUZ12//SERTAD1//IGF1//MAB2L1//AKIRIN2//EIF5A2//TGFR

//NFX1//RPS14//TXN//MTDH//TCEAL1//DCP2//NCBP2//UPF3B//EIF4A3//TGFR1//IL1B//SOD1//SPRED2//FBXW1

'SEC22A//GLE1//RABGEF1//RAB40AL//RAB37//SERP2//RHOB//SDAD1//EIF5A2//RAB22A//RAB3A//RAB5A//KIF18A//GOL1//CASC5//KIF20A//CENPF//RAB31//SNF8//CHMP4B//CHCHD4//SEC22A//RABGEF1//RAB40AL//RAB37//SEI

//PSMC5//TBK1//HBB//HSP90AA1//H2AFX//GAPDHS//USP16//PPM1A//ENY2//MRPL12//FOX L2//CCNE1//EIF5A2/

'ANAPC11//PSMA3//PSMA6//PSMA7//PSMB5//PSMC5//PSMD9//PSMD11//PSMD12//PSME1//SKP1//CCNB1//UBE3A//AKT1S1//RRAGB//RRAGC//SLC30A8//PSMD9//GRB2//EPN1//SOCS1//TBK1//MAP3K3//ZDHHC13//PELI2//BST

'1//CENPF//CCDC85B//EZH2//HMGB2//AKIRIN2//PSMC5//SMURF2//HIRA//EIF4A3//NCBP2//NAE1//NLRP12//FBX1//DNP//TBK1//CENPF//CCDC85B//EZH2//HMGB2//AKIRIN2//PSMC5//SMURF2//HIRA//EIF4A3//NCBP2//NAE1//NLF

'IF20A//CENPF//RAB31//SNF8//CHMP4B//CHCHD4//VPS13B//SEC22A//GLE1//RABGEF1//RAB40AL//RAB37//SEI//NKTR//FKBP14//DNAJA4//HSPA1B//HSP90AA1//EIF5A2//FEM1B//DCAF7//MARCH6//UBE2C//DCAF4//TRIM23//A

1//RABGEF1//RAB40AL//RAB37//SERP2//RHOB//SDAD1//EIF5A2//RAB22A//RAB3A//RAB5A//KIF18A//RAB7L1//C

1//HSPA8//TOB1//KIF1B//HMGXB4//RHOB//NLRP12//TXN//UBR5//EGF//DAB2IP//IL1B//CYLD//FBXW11//ATP5G1//A

'SOD1//CYLD//SUN1//CAP2//SGCD



;ENPF//CCDC85B//EZH2//HMGB2//AKIRIN2//PSMC5//SMURF2//HIRA//EIF4A3//NAE1//NLRP12//FBXW11//STAG2

/USP16//PPM1A//ENY2//MRPL12//FOX L2//CCNE1//EIF5A2//PQBP1//CAMKK2//INHBA//SMAD5//MAX//MYBL1//MY

AD51C//SLC16A1//TFPI//VEGFA//TFPI2//CALU//KIF18A//CD9//KIF23//TXN//HSD17B3//HSD17B6//CRH//CCL7//S

//NFX1//RPS14//TXN//MTDH//TCEAL1//DCP2//NCBP2//UPF3B//EIF4A3//SRSF10//SMN2//SNRPD1//SNRPD2//LSM

RIAP1//PSMA3//PSMA6//PSMA7//PSMB5//PSMC5//PSMD9//PSMD11//PSMD12//PSME1//SUZ12//SERTAD1//IGF1

//TGFBR1//CENPA//SUN1//RRAGB//RRAGC

90AA1//SEC61G//TGFBR1//CENPA//SUN1

4//SNRK//PRKACB//PBK//EIF2AK2//TEX14//STK3//AURKA//AURKC//BUB1//CDK11A//STK24//CCNE1//AKT1S1//PI

4//SNRK//PRKACB//PBK//EIF2AK2//TEX14//STK3//AURKA//AURKC//BUB1//CDK11A//STK24//CCNE1//AKT1S1//PI

3BP//TPD52L1//UBR5//DAB2IP

2//CA2//VPS13B//NPM1//HNRNPA1//NXF1//SRSF10//NCBP2//GLE1//UPF3B//U2AF1//SRSF9//KPNA2//IPO11//RPL

IT9A//SDCBP//TPD52L1//NMU//UBR5

9//TPD52L1//NMU//UBR5

3SRSF10//NCBP2//GLE1//UPF3B//U2AF1//SRSF9//KPNA2//IPO11//RPL23//SMURF1//STRADA//SDCBP//RTP4//TOI

1G1//EIF5A2//NPM1//RRM2//USP16//ALDOC//SOD2//PDSS2//HBB//CENPA//CENPF//PSMD9

//TPM1

//NDUFB4//CAP2//GRB2//ITGA2B//RHOB//SDCBP//WASL//ENSA//SSTR2//STC1//STC2//CCNB1//BAIAP2//PPM1A

2//GH1//SOCS1//RAB31//CHN1//TAGAP//RHEBL1//RAB40AL//RAB37//TRIM23//RHOB//RHOT1//DEPDC1B//RAB2  
DH//TCEAL1//DCP2//NCBP2//UPF3B//EIF4A3//SRSF10//SMN2//SNRPD1//SNRPD2//LSM3//BCAS2//HNRNPM//SY

'2//NCBP2//UPF3B//EIF4A3//SRSF10//SMN2//SNRPD1//SNRPD2//LSM3//BCAS2//HNRNPM//SYNCRIP//HNRNPA'

14//TXN//MTDH//TCEAL1//DCP2//NCBP2//UPF3B//EIF4A3//TGFB1//IL1B//SOD1//SPRED2//FBXW11//UBR5//SM  
F1B//SYT9//IFNG//SLC2A1//DAB2IP//NLRP12//TGFB1//GH1//IGF1//NMU//SOD1//SLC30A8//GAL//FAM3B//PPM1.

AS2//PTPN1//SOCS1//ISG15//SDC2//MTDH//CTNNB1//GH1//AURKA//DCN//GCH1//AKIRIN2//BDKRB1//CLDN4//C

RM2//CCNE1//CTNNB1//BPTF//ZFPM2//SUZ12//FOSB//HSBP1//NFX1//RPS14//TXN//MTDH//TCEAL1//CAMKK2//  
I2//FOXL2//CCNE1//PQBP1//CAMKK2//INHBA//SMAD5//MAX//MYBL1//MYC//NPM1//PSMD9//TGFB1//ZFX//MED

O1//NME1//PLSCR1//PDSS2

4//STAG2//SGOL1//CENPI//SKA2//CASC5//SPC25//CENPH//BUB1//KIF18A//KNTC1//DLGAP5//KIF11//STMN1//USP  
2//TPD52L1//PPM1D//KIF20A//CENPA//STAG2//SGOL1//CENPI//SKA2//CASC5//SPC25//CENPH//BUB1//KIF18A//I  
ISP90AA1//HAUS2//TPD52L1//PPM1D//KIF20A//CENPA//STAG2//SGOL1//CENPI//SKA2//CASC5//SPC25//CENPH  
PA//STAG2//SGOL1//CENPI//SKA2//CASC5//SPC25//CENPH//BUB1//KIF18A//KNTC1//DLGAP5//TRIP13//TOP2A//I  
4//FAM83D//CCNB2//PTTG1//KLHL21//H2AFX//RAD51//MND1//SYCP2//UBR2//UBE2S//SBDS//EGF//IGF1//IL1B  
PF//CYLD//DYNLT3//NPM1//BIRC5//NAE1//WNT9A//STAG2//SBDS//PLA2G16//RHOB//EGF//IGF1//IL1B//NUSAP1//  
.GAP5//DYNC1LI1//CTNNB1//TOP2A//CASC5//FEM1B  
3//F23//KLHL21//DLGAP5//UBE2S//EGF//IGF1//IL1B//KIF20A  
//CCNE1//CCNB2//CCNE2//PTTG1//KNTC1

3//TOP2A//CASC5//DYNC1LI1//PLA2G16//RHOB

1//PSMC5//PSMD11//PSMD12//PSME1//AURKA//CCNB1//PTTG1//FBXW11//PCNP//PAPD5

H2AFJ//HIST2H2AC//H2AFV//SDCBP//CAP2//SGCD//TPM1//MAN2A1//RNASEH1//EZH2//BPTF//MRPL12//TOMM5

//TOP2A//IFI6//SOD2//CHD1//BAZ1B//OIP5//H2BFM//H2AFX//H2AFZ//HMGB2//NAP1L4//NPM1//H2AFJ//HIST2H2A  
3P2//PCNA//POLE2//RFC5//RAD51//TOP2A//IFI6//SOD2//CHD1//BAZ1B//OIP5//H2BFM//H2AFX//H2AFZ//HMGB2//I

IA8//CCNB1//UBE2G2  
MD9//PSMD11//PSMD12//PSME1//PSMA8//CCNB1//CYLD//UBE2G2

VP

IL2//MYC//POLE4//CENPF//CTNNB1//PTTG2//PTTG1

APC11//PSMD11//PSMD12//PSME1//AURKA//CCNB1//PTTG1//FBXW11//PCNP//IFNG//IL1B//PAPD5

3C//CDK11A//MORF4L2//IFI6//SOD2//CTNNB1//HNRNPAB//IFNG//CHD1//BAZ1B//OIP5//H2BFM//H2AFX//H2AFZ//

1//TOP2A//CAP2//NOX4//RRAGC//CDK11A//MORF4L2//IFI6//SOD2//CTNNB1//HNRNPAB//IFNG//CHD1//BAZ1B//O

MB5//USP16//UBE2C//CYLD//UBR2//PSMD9//SKP1//UBE2D2//UBE2D3//UBE2G2//USP13//MCCC2//SDS//MTDH//

SBDS//CCNB1//POMP//PSMG1//EIF5A2//CENPF//PSMD9

<24//SOD1//FOXL2//TPD52L1//CFDP1//HSPA1B//IGF1//NPM1//BCL2A1//YWHAZ//FEM1B//GCH1//TFPT//INHBA//I  
//HSPA1B//BIRC5//IGF1//IL1B//NPM1//TRIAP1//BCL2A1//BNIP1//SOD1//YWHAZ//CDKN3//SESN3//INHBA//MYC//F  
//FOXL2//TPD52L1//CFDP1//HSPA1B//IGF1//NPM1//BCL2A1//YWHAZ//FEM1B//GCH1//TFPT//INHBA//IFI27//NLRP

//SLTM//STK24//SOD1//FOX L2//TPD52L1//CFDP1//HSPA1B//IGF1//NPM1//BCL2A1//YWHAZ//FEM1B//GCH1//TFP  
//TRIM23//ANAPC11//PCNP//SKP1//UBE2D2//KLHL21//CYLD//EIF1AX//RPL7L1//GTF2H3//ASMT//MRPS7//MRPS2

//PSME1//YWHAZ

NG//DAB2IP//GAL//ING3//STK3//EEF1E1//MAD2L1//MDM2//VEGFA//MTDH//ADNP//GCLM//NCF2//AKT1S1//TGFB

MC5//PSMD9//PSMD11//PSMD12//PSME1//CCNB1//CCNB2//CCNE2//H2AFX//CDKN3//CKS2//SERTAD1//BCCIP//  
3//UBR5

//HSPA1B//BIRC5//IGF1//IL1B//NPM1//TRIAP1//BCL2A1//BNIP1//SOD1//YWHAZ//CDKN3//SESN3//INHBA//MYC//F  
MND1//MYC//STAG2//NPPC//PTTG2

3//PSMA6//PSMA7//PSMB5//USP16//UBE2C//CYLD//UBR2//PSMD9//SKP1//UBE2D2//UBE2D3//UBE2G2//USP13//  
//KIF18A//CCNB1//TOB1//RAB3A//SYT9//IL1B//PRKACB//SLC2A1//KIF1B//HMGXB4//RHOB//NLRP12//SGOL1//CA

3OSR1//HSPA8//DLGAP5//KIF18A//CCNB1//TOB1//RAB3A//SYT9//IL1B//PRKACB//SLC2A1//KIF1B//HMGXB4//RH

BE2C//UBE2S//CCDC88A//VMO1//CCL26//CD9//STMN1//NDUFAF4//PANX1//PVRL3//GRB2//LIMS1//CTNNB1//HS

3//SLC16A1//TFPI//TFPI2//CALU//KIF18A//CD9//KIF23//STRA13//RDM1//EYA2//UBE2T//NPM1//PCNA//POLE2//BC

//UBE2S//CCL26//NDUFAF4//PANX1//HSP90AA1//STOM//SBDS//POMP//PSMG1//EIF5A2//RRM2//USP16//ALDOC  
MA3//PSMA7//PSMB5//BUB1//TOP1//EIF4H//PDCL3//BST2//RSAD2//CMPK2//HMGB2

AF4//PVRL3//GRB2//LIMS1//CTNNB1//HSP90AA1//BBIP1//POMP//PSMG1//TPM1//BAIAP2//HAUS2//CENPF//ADN

3TMN1//NDUFAF4//PANX1//PVRL3//GRB2//LIMS1//CTNNB1//HSP90AA1//BBIP1//STOM//POMP//PSMG1//TPM1//E

52L1//CAMKK2//FBXW11//VEGFA//UBE2C//MAD2L1//ANAPC11//PSMA3//PSMA6//PSMA7//PSMB5//PSMC5//PSM

6R3//CAMKK2//HSP90AA1//WASL//GCH1//HP//UBE2C//MAD2L1//ANAPC11//PSMA3//PSMA6//PSMA7//PSMB5//P

3MC5//PSMD9//PSMD11//PSMD12//PSME1//PSMA8//SKP1//FEM1B//UBE2S//STK3

PSMG1//RRM2//USP16//ALDOC//SOD2//PDSS2//HBB//CENPF//PSMD9  
JG//CTNNB1//DAB2IP//GAL//ING3//STK3//TOP2A//EEF1E1//MAD2L1//MDM2//SOD2//VEGFA//MTDH//ADNP//GCL

E1//EIF5A2//PQBP1//CAMKK2//INHBA//SMAD5//MAX//MYBL1//MYC//NPM1//PSMD9//ZFX//MED30//FOX4L1//FO  
P1//NME1//TXN//TPD52L1//PPP6R3//CAMKK2//HSP90AA1//WASL//GCH1//FOX4L1//FOX4//FOX2//FOX4L3,

MD9//PSMD11//PSMD12//PSME1//SKP1//CCNB1//UBE2S//IFNG//STK3  
J2//FBXW11//UBR5//SMURF1//UBE2D3//ISG15//HERC6//SMURF2//SRSF10//SMN2//SNRPD1//SNRPD2//LSM3//E

//LAG3//PSMA8//NME1//MST4//PSMA3//PSMA6//PSMA7//PSMB5//PSMC5//PSMD9//PSMD11//PSMD12//PSME1//

NG//CTNNB1//DAB2IP//GAL//ING3//STK3//TOP2A//EEF1E1//MAD2L1//MDM2//SOD2//VEGFA//MTDH//ADNP//GC

NRK//PRKACB//PBK//EIF2AK2//TEX14//STK3//AURKA//AURKC//BUB1//CDK11A//STK24//CCNE1//AKT1S1//PPM1

52L1//CAMKK2//FBXW11//VEGFA//UBE2C//ANAPC11//PSMA3//PSMA6//PSMA7//PSMB5//PSMC5//PSMD9//PSMD

1//NLRP12//NGFRAP1//IFI27//CRH//CYCS//DAB2IP//MTDH//GH1//CTNNB1//GABPB1//HBB//HP//ADNP//ARPP19//

1//UBR5//SMURF1//UBE2D3//ISG15//HERC6//SMURF2//SRSF10//SMN2//SNRPD1//SNRPD2//LSM3//BCAS2//HNF



3A//RAB7L1//CHMP4C//RAB33A//GOSR1//BIRC5//TXN//UBR5//MDM2//RRAGB//RRAGC//EGF//DAB2IP//IL1B//CYL  
RP2//RHOB//SDAD1//EIF5A2//RAB22A//RAB3A//RAB5A//KIF18A//RAB7L1//CHMP4C//RAB33A//GOSR1//ABCD3//

/PQBP1//CAMKK2//INHBA//SMAD5//MAX//MYBL1//MYC//NPM1//PSMD9//ZFX//MED30//FOX4L1//FOX4//FOX4

2S//IFNG//STK3

2//MTDH//C9ORF89//EEF1E1//MDM2//WNT9A//SDCBP//TPD52L1//PTPN1//SIRT4//RAB5A//EZH2//ADNP//CRH//C

W11//STAG2//MAD2L1//INHBA//SOCS1//LAG3//SOD1//IL1B//HNRNPAB//SRSF10//NPPC//UBE2C//ANAPC11//PSM  
P12//FBXW11//STAG2//MAD2L1//SOCS1//INHBA//LAG3//HNRNPAB//SRSF10//NPPC//UBE2C//ANAPC11//PSMA

RP2//RHOB//SDAD1//EIF5A2//RAB22A//RAB3A//RAB5A//KIF18A//RAB7L1//CHMP4C//RAB33A//GOSR1  
ANAPC11//PCNP//SKP1//UBE2D2//KLHL21//CYLD//EIF1AX//RPL7L1//GTF2H3//ASMT//MRPS7//MRPS23//BRX1//I

HMP4C//RAB33A//GOSR1//TXN//UBR5//EGF//DAB2IP//IL1B//CYLD//FBXW11//HSP90AA1//SEC61G//DPH3//PAN

SEC61G//RHOT1//RAB31//TGFB1

//INHBA//SOCS1//LAG3//HNRNPAB//SRSF10//NPPC//UBE2C//MAD2L1//ANAPC11//PSMA3//PSMA6//PSMA7//PSI

/C//NPM1//PSMD9//ZFX//MED30//MTDH//FOXD4L1//FOXD4//FOXD2//ZFPM2//FOXD4L3//TFAP2E//AKIRIN2//NCB

TC1//HP//MYC//SLC30A8//CTNNB1//CD55//IL1B//BDKRB1//TAC1//HSPA8//RAB3A//CDO1//NME1//SYT9//SLC2A1/

/3//BCAS2//HNRNPM//SYNCRIP//HNRNPA1//HNRNPH3//HNRNPK//U2AF1//SRSF9//GTF2H3//RAD51AP1//H2AF;

//MAB21L1//AKIRIN2//EIF5A2//TGFB1//NLRP12//NGFRAP1//IFI27//CRH//CYCS//NPPC//NMU//DAB2IP//MTDH//C

PM1K//FBXW11//PPM1A//PPP3CA//PTPN1//PPM1D//CDC14A//IMPA1//ACYP1//DAB2IP//GH1//TOP1//BAZ1B//EYA  
PM1K//FBXW11//PPM1A//PPP3CA//PTPN1//PPM1D//CDC14A//DAB2IP//GH1//TOP1//BAZ1B//EYA2//ABI1//NLRP1

23//SMURF1//STRADA//SDCBP//RTP4//TOMM5//ABCC5//SLC36A4//ENSA//HBB//NDUFA8//NDUFB2//NDUFB4//N

VM5//ABCC5//SLC36A4//ENSA//HBB//NDUFA8//NDUFB2//NDUFB4//NDUFB9//NDUFS6//TMED7//DYNC1LI1//ATP

//STRADA//CENPF//CTNNB1//IFNG//MYC//NCF2//NME1//GAL//ABCD3//TOP1//YWHAZ//SOCS1//CCNE1//AQP10/

2A//RAB3A//RAB5A//RRAGC//RAB7L1//ARHGAP11B//RAB33A//ARHGAP25//GRB2//IGF1//SDCBP//NLRP12//NDC  
Y//NCRIP//HNRNPA1//HNRNPH3//HNRNPK//U2AF1//SRSF9//GTF2H3//RAD51AP1//H2AFX//RAD51//EIF5A2//TPI1/

1//HNRNPH3//HNRNPK//U2AF1//SRSF9//GTF2H3//RAD51AP1//H2AFX//RAD51//PTTG2//RNASEH1//HMGB2//CCI

URF1//UBE2D3//ISG15//HERC6//SMURF2//SRSF10//SMN2//SNRPD1//SNRPD2//LSM3//BCAS2//HNRNPM//SYNC  
A//HMGXB4//WWOX//SMURF1//FOXD4L1//FOXD4//FOXD2//FOXD4L3//TWSG1//TOB1//CD9//VEGFA//ADNP//CCI

AL//PANX1//PCNA//SDS//STC2//CA2//NPPC//HMGB2//NME1//TGFBR1//CMPK2//RRAGB//RRAGC//DAB2IP//INHE

MAP3K3//EGF//TGFBR1//IL1B//SOD1//SPRED2//POLE2//RRAGC//CDK11A//MORF4L2//CAMLG//B2M//CCDC88A  
30//MTDH//FOXD4L1//FOXD4//FOXD2//ZFPM2//FOXD4L3//TFAP2E//AKIRIN2//PRTFDC1//NCBP2//GTF2H3//RAD

P16//UBE2C//OIP5//CDCA2//DYNC1LI1//ANAPC11//TXNL4B//PBK//PAPD5//AURKA//DYNLT3//CDK11A//FAM83D//  
KNTC1//DLGAP5//TRIP13//TOP2A//TRIAP1//SESN3//IFNG//MYC//PPM1A//RPRM//STRADA//CKS2//KIF11//AURKA//  
//BUB1//KIF18A//KNTC1//DLGAP5//TRIP13//AURKA//PTTG1//TOP2A//BEX2//TRIAP1//SESN3//IFNG//MYC//PPM1  
UBE2C//CKS2//KIF11//AURKA//STMN1//USP16//OIP5//CDCA2//DYNC1LI1//ANAPC11//TXNL4B//PBK//PAPD5//DY  
  
/DLGAP5//BTG3//DYNC1LI1//CTNNB1//TOP2A//CASC5//FEM1B//BEX2//CCNE1

5//YWHAZ//RAB3A//CTNNB1//STMN1//BNIP1//NPLOC4//ABCD3//RAB22A//UBE2C//CKS2//KIF11//AURKA//RAD51

AC//H2AFV//SDCBP//CAP2//SGCD//TPM1//MAN2A1//RNASEH1//CYCS//SOD1//FOX L2//TPD52L1//EZH2//BPTF//S  
NAP1L4//NPM1//H2AFJ//HIST2H2AC//H2AFV//SDCBP//CAP2//SGCD//TPM1//MAN2A1//RNASEH1//CYCS//SOD1//

HMGB2//NAP1L4//NPM1//H2AFJ//HIST2H2AC//H2AFV//SDCBP//SGCD//TPM1//MAN2A1//RNASEH1//CYCS//SOD

IP5//H2BFM//H2AFX//H2AFZ//HMGB2//NAP1L4//NPM1//H2AFJ//HIST2H2AC//H2AFV//SDCBP//SGCD//TPM1//MA

/NUDT7//NUDT3//PRKACB//CDO1//NPLOC4//UBE2S//MAD2L1//ANAPC11//PSMD11//PSMD12//PSME1//AURKA//

FI27//NLRP12//TOP1//PRTFDC1//CRH//HBB//HP//NME1//BEX2//NAE1//TOP2A//IFNG//DAB2IP//GAL//ING3//STK3/  
PM1A//RPRM//STRADA//ZWINT//BUB1//KNTC1//CENPF//ABI1//TOB1//BTG3//NPPC//NOX4//GAL//EIF2AK2//RAR  
12//ZFYVE27//HSPB8//SMN2//TOP1//PRTFDC1//CRH//HBB//HP//NME1//BEX2//NAE1//TOP2A//IFNG//DAB2IP//G

T//INHBA//IFI27//NLRP12//CRH//NME1//BEX2//NAE1//TOP2A//IFNG//DAB2IP//GAL//ING3//STK3//EEF1E1//MAD2L  
23//BRX1//MRPL47//RPL27A//MRPL12//RPS7//RPS14//RPS15//RPS24//MRPS25//EIF4H//SECISBP2//RPL23//MR

R1//SYCP2//TRIM69//EYA2//ALDOC//KIF1B//JMJD6//MAGI3//CKAP2//MAGEH1//UBQLN1//FAM3B//RHOT1//RRA

INHBA//SKP1//CCNE1//CEP152//HSP90AA1//HAUS2//TPD52L1//PPM1D//KIF20A//CENPA//STAG2//CENPI//BUB1

PM1A//RPRM//STRADA//ZWINT//BUB1//KNTC1//CENPF//ABI1//TOB1//BTG3//NPPC//NOX4//GAL//EIF2AK2//RAR

NGLY1//MCCC2//SDS//HSD17B6//MTDH//NUDT7//NUDT3//PLA2G16//PLD6//PLA2G4C//PRKACB//CDO1//NPLOC  
SC5//INHBA//NMU//SLC30A8//GAL//FAM3B//PSMD9//TXN//UBR5//MDM2//RRAGB//RRAGC//DAB2IP//NUSAP1//C

OB//NLRP12//INHBA//NMU//SLC30A8//GAL//FAM3B//PSMD9//TXN//UBR5//DAB2IP//NUSAP1//CYLD//FBXW11//AT

P90AA1//SDAD1//BBIP1//STOM//POMP//PSMG1//TPM1//BAIAP2//HAUS2//RRM2//USP16//ALDOC//SOD2//PDSS

CIP//RFC5//TOP2A//UBE2D3//PTTG1//MORF4L2//HMGB2//BAZ1B//TRIP13//CCL26//CDO1//CRH//NFX1//NOX4//C  
//SOD2//PDSS2//HBB//CENPF//PSMD9

NP//PSMD9//MTDH//HSPA1B//KIF11

AIAP2//HAUS2//RRM2//USP16//ALDOC//SOD2//PDSS2//HBB//CENPF//ADNP//PSMD9//MTDH//HSPA1B//KIF11

D9//PSMD11//PSMD12//PSME1//PSMA8//SKP1//FEM1B//UBE2S//STK3



PPM1A//PPP3CA//PTPN1//PPM1D//CDC14A//SIRT4//TPST1//ST6GALNAC2//DPM1//MAN2A1//POMT1//UBE2W//E

'SMC5//PSMD9//PSMD11//PSMD12//PSME1//PSMA8//SKP1//CCNB1//FEM1B//UBE2S//IFNG//STK3

M//NCF2//AKT1S1//TGFBR1//LAG3

XD4//FOX D2//ZFPM2//FOX D4L3//TFAP2E//AKIRIN2//PRTFDC1//NCBP2//GTF2H3//VEGFA//RAD51//UBE2C//PSM  
//RHEBL1//PSMA6//MTDH//DPH3//HP//UBE2C//MAD2L1//ANAPC11//PSMA3//PSMA7//PSMB5//PSMC5//PSMD9//F

3CAS2//HNRNPM//SYNCRIP//HNRNPA1//HNRNPH3//HNRNPK//U2AF1//SRSF9//GTF2H3//RAD51AP1//H2AFX//R

BEX2//NAE1

LM//NCF2//AKT1S1//TGFBR1//LAG3

IK//PPM1A//PPP3CA//PTPN1//PPM1D//CDC14A//SIRT4//TPST1//ST6GALNAC2//DPM1//MAN2A1//POMT1//UBE2

11//PSMD12//PSME1//PSMA8//SKP1//FEM1B//UBE2S//STK3

'SBDS//EIF4A3//NMU//PPM1A//FOX D4L1//FOX D4//FOX D2//FOX D4L3//TWSG1//NPPC//GRB2//SMURF1//CCNB1//

RNPM//SYNCRIP//HNRNPA1//HNRNPH3//HNRNPK//U2AF1//SRSF9//GTF2H3//RAD51AP1//H2AFX//RAD51//CAM

LD//FBXW11//HSP90AA1//SEC61G//DPH3//PANX1//CCNB1//TGFBR1//CENPA//SUN1  
IL1B//BIRC5//TXN//UBR5//MDM2//RRAGB//RRAGC//EGF//DAB2IP//CYLD//FBXW11//INHBA//HSP90AA1//SEC61G

Y2//ZFPM2//FOXD4L3//TFAP2E//AKIRIN2//PRTFDC1//NCBP2//GTF2H3//VEGFA//RAD51//UBE2C//PSMA8//ANAPC

YTHRC1//CYLD//STK3//UBR5

Y3//PSMA6//PSMA7//PSMB5//PSMD9//PSMD11//PSMD12//PSME1//HP  
3//PSMA6//PSMA7//PSMB5//PSMD9//PSMD11//PSMD12//PSME1

YMRPL47//RPL27A//MRPL12//RPS7//RPS14//RPS15//RPS24//MRPS25//EIF4H//SECISBP2//RPL23//MRPL33//PUM

Y<1//TGFBR1//MDM2

MB5//PSMD9//PSMD11//PSMD12//PSME1//HP

3P2//GTF2H3//ADNP//VEGFA//RAD51//UBE2C//PSMA8//ANAPC11//PSMA3//PSMA6//PSMA7//PSMB5//PSMD11//F

'/UTS2//GCH1//NPPC//CFDP1//CDC42SE2//NDC80//SGOL1//CASC5//EIF5A2//INHBA//NMU//EIF2AK2//RHOT1//G

X//RAD51//TPI1//NME1//PRTFDC1//NPPC//RAB31//GCH1//NKIRAS1//TRIM23//RHOB//RAB22A//RAB3A//RAB5A//I

3H1//GABPB1//HBB//HP//ADNP//ARPP19//SBDS//EIF4A3//PPM1A//FOXD4L1//FOXD4//FOXD2//FOXD4L3//TWSG

2//ABI1//NLRP12//ADNP//STRADA//IFNG//DUSP14//INHBA//SDCBP//IGF1//TPD52L1//PPP6R3//MAP3K3//NEK2//  
2//ADNP//STRADA//IFNG//DUSP14//INHBA//SDCBP//IGF1//TPD52L1//PPP6R3//MAP3K3//NEK2//IMPA1//VEGFA//

IDUFB9//NDUFS6//TMED7//DYNC1LI1//ATP5G1//CYCS//ENY2//DYNLT3//TXN//UQCRB//EIF4A3//ATP5S//KCNF1//

'5G1//CYCS//ENY2//DYNLT3//TXN//UQCRB//EIF4A3//ATP5S//KCNF1//KCNK1//ZDHHC13//TMEM38B//SLC4A8//P/

//CD9//ADNP//SLC30A8//CA2//IMPA1//CDO1//LUM//IFI6//HLA-B//IFI27//IFI35//OAS1//OAS2//PTPN1//ISG15//PCNA

;80//UBE2C//ZWINT//CKS2//HMGB2//PCNA//AURKA//TOP2A//AKT1S1//CCDC88A//RRAGB//IFNG//CTNNB1//ZDH  
/SOD1//ERH//OAS1//OAS2//NME1//PRTFDC1//NPPC//RAB31//GCH1//NKIRAS1//TRIM23//RHOB//RAB22A//RAB3,

NE2//ESCO2//CCDC88A//STRA13//RDM1//EYA2//UBE2T//NPM1//BCCIP//RAD51C//UBE2D3//PTTG1//MORF4L2//

;RIP//HNRNPA1//HNRNPH3//HNRNPK//U2AF1//SRSF9//GTF2H3//RAD51AP1//H2AFX//RAD51//CAMLG//CCDC88  
NE1//AKT1S1//RRAGB//RRAGC//PSMD9//EPN1//SOCS1//TBK1//MAP3K3//ZDHHC13//PELI2//MTDH//C9ORF89//E

3A//PRKACB//SSTR2//CCNB1

//SOCS1//BDKRB1//PELI2//CCL26//HMGB2//VEGFA//TNNI3//IFNG//MYC//TBK1//YWHAZ//NME1//TPM1//SOD2//BI  
51

'PTTG1//KLHL21//MDM2//CYLD//RPRM//UBE2S//NAE1//WNT9A//SBDS//EGF//IGF1//IL1B//BTG3//TOP2A  
A//STMN1//RAD51C//USP16//OIP5//CDCA2//DYNC1LI1//TXNL4B//PBK//PAPD5//DYNLT3//CDK11A//FAM83D//PTT  
A//RPRM//STRADA//KIF11//STMN1//RAD51C//USP16//OIP5//CDCA2//DYNC1LI1//TXNL4B//PBK//PAPD5//DYNLT3  
NLT3//CDK11A//FAM83D//PTTG1//KLHL21//MDM2//H2AFX//RAD51//MND1//SYCP2//UBR2//UBE2S//WNT9A//SBD

C//USP16//CDCA2//DYNC1LI1//ANAPC11//TXNL4B//HAUS2//PBK//PAPD5//DYNLT3//CDK11A//FAM83D//CCNB2//

SRSF9//MRPL12//RPL27A//RPS7//RPS24//RPL23//TOMM5//YWHAZ//CTNNB1//MST4//STK24//RAB3A//STMN1//B  
/FOXL2//TPD52L1//EZH2//BPTF//SBDS//RPS7//RPS24//UTP23//EIF4A3//SRSF9//MRPL12//RPL27A//RPL23//TOM

1//FOXL2//TPD52L1//EZH2//BPTF//SRSF9//MRPL12//RPL27A//RPS7//RPS24//RPL23//GCH1//MDM2//PARD6B//M

N2A1//RNASEH1//CYCS//SOD1//FOXL2//TPD52L1//EZH2//BPTF//SBDS//RPS7//RPS24//UTP23//EIF4A3//SRSF9/

CCNB1//PTTG1//FBXW11//ACAP2//TBC1D2B//TNNI3//TPM1//CCL26//DAB2IP//HBB//PCNP//GAPDHS//IGF1//PLA:

//EEF1E1//MAD2L1//MDM2//VEGFA//MTDH//ADNP//GCLM//NCF2//AKT1S1//TGFB1//ZFYVE27//HSPB8//SMN2  
RES3//SOD2//SSTR2//WNT9A//PPM1D//CD9//EEF1E1//NLRP12//DAB2IP//FOXD4L1//FOXD4//FOXD2//FOXD4L3  
AL//ING3//STK3//EEF1E1//MAD2L1//MDM2//VEGFA//MTDH//ADNP//GCLM//NCF2//AKT1S1//TGFB1



.1//MDM2//VEGFA//MTDH//ADNP//GCLM//NCF2//AKT1S1//TGFB1//TOP1  
PL33//PUM2//NGDN//TACO1//EEF1E1//NCBP2//GGCX//UBE2S//CAMKK2//TP53RK//TBK1//MST4//SNRK//PRKAC

3C//BUB1//CDK11A//UBE2D3//PDCL3//SLTM

//KIF18A//KNTC1//DLGAP5//CDO1//CTNNB1//BPTF//ZFPM2//SUZ12//FOSB//HSBP1//NFX1//TXN//MTDH//TCEAL

RES3//SOD2//SSTR2//WNT9A//PPM1D//CD9//EEF1E1//NLRP12//DAB2IP//FOXO4L1//FOXO4//FOXO2//FOXO4L3

4//UBE2S//MAD2L1//ANAPC11//PSMD11//PSMD12//PSME1//AURKA//CCNB1//PTTG1//FBXW11//ACAP2//TBC1D  
YLD//FBXW11//ATP5G1//SEC61G//SIRT4//RHOT1//RAB31//DPH3//PANX1//BIRC5//CENPF//CRH//ZWINT//TGFB

TP5G1//SEC61G//SIRT4//RHOT1//RAB31//DPH3//PANX1//BIRC5//CENPF//CRH//TGFB1//ZWINT

2//HBB//CENPF//ADNP//PSMD9//MTDH//HSPA1B//KIF11

3AL//BDKRB1//CCL7//TNFAIP6//TPST1//PLA2G4C//NCF2//UBR5//PSMA8//MDM2//TRIAP1//PSMA3//PSMA6//PSM

DAB2IP//GH1//ADNP//EZH2//SUZ12//BAZ1B//EYA2//USP16//ENY2//DPH3//GGCX//ABI1//FKBP14//MAGT1//B4GAL

IA8//ANAPC11//PSMA3//PSMA6//PSMA7//PSMB5//PSMD11//PSMD12//PSME1//SKP1//UBE2S  
PSMD11//PSMD12//PSME1//PSMA8//SKP1//CCNB1//FEM1B//UBE2S//IFNG//STK3

AD51//CAMLG//CCDC88A//SOCS1//BDKRB1//CCNB1//PELI2//CCT7//DNAJC21//HSPA8//NKTR//FKBP14//DNAJA4

//DAB2IP//GH1//ADNP//EZH2//SUZ12//BAZ1B//EYA2//USP16//ENY2//DPH3//ABI1//FKBP14//MAGT1//B4GALT4//

//UBE2C//BIRC5//RRAGB//RRAGC//SLC30A8//CA2//UBR5//SDCBP//GAL//ING3//SOD1//STK3//TOP2A//EEF1E1//T

LG//CCDC88A//SOCS1//BDKRB1//CCNB1//PELI2//CCT7//DNAJC21//HSPA8//NKTR//FKBP14//DNAJA4//HSPA1B//

3//DPH3//PANX1//ENY2//EIF4A3//CCNB1//TGFBR1//CENPA//SUN1

311//PSMA3//PSMA6//PSMA7//PSMB5//PSMD11//PSMD12//PSME1//SKP1//UBE2S

2//NGDN//TACO1//EEF1E1//NCBP2//GGCX//UBE2S//CAMKK2//TP53RK//TBK1//MST4//SNRK//PRKACB//PBK//EIF

'SMD12//PSME1//SKP1//UBE2S

AL//FAM3B//PLSCR1//ASMT//RPS14//SFXN1//TGFBR1//CCDC85B//HSPA1B//CCL26//AURKA//FBXW11//MDM2//F

RRAGC//RAB7L1//RAB33A//KIF1B//PSMC5//ERH//CMPK2//PTTG2//RNASEH1//HMGB2//CCNE2//ESCO2//CCDC8

1//GRB2//SMURF1//CCNB1//UBE2C//BIRC5//RRAGB//RRAGC//SLC30A8//CA2//UBR5//SDCBP//FBXW11//GAL//IN

VEGFA  
'ACYP1

'KCNK1//ZDHHC13//TMEM38B//SLC4A8//PANX1//ATP13A3//KCTD20//SLN//COX17//SFXN1//SLC30A7//SLC30A8

\ANX1//ATP13A3//KCTD20//SLN//COX17//SFXN1//SLC30A7//SLC30A8//PRKACB//AQP10//HSP90AA1//NPM1//PCN

//ITGAM//SBDS//MTDH//GH1//AURKA//DCN//GCH1//AKIRIN2//BDKRB1//CLDN4//GGCX//PANX1//SDS//TPM1//HB

IHC13//PPM1A//PELI2//BST2//MTDH//C9ORF89//EEF1E1//TPD52L1//MAGI3//WSB1//STMN1//PLA2G4C//SH3BP5  
A//RAB5A//RRAGC//RAB7L1//RAB33A//KIF1B//PSMC5//CMPK2//PTTG2//RNASEH1//HMGB2//CCNE2//ESCO2//C

SOD1//BAZ1B//TRIP13//CYCS//FOX L2//TPD52L1//MND1//SIRT4//TRAPPC2//RRAGC//FOX D4//FOX D2//GABPB1//

3A//SOCS1//BDKRB1//CCNB1//PELI2//CCT7//DNAJC21//HSPA8//NKTR//FKBP14//DNAJA4//HSPA1B//HSP90AA1//  
EF1E1//TPD52L1//PTPN1//SIRT4//RAB5A//EZH2//CTHRC1//CYLD//STK3//UBR5//OIP5

EX2//GGCX//GRB2//HBB//IGF1//ITGA2B//ITGAM//KIF11//RHOB//LAMP2//PPBP//PRKACB//PTPN1//RAB5A//RAD5

G1//KLHL21//NPM1//RAD51//MND1//SYCP2//UBR2//UBE2S//CTNNB1//NAE1//WNT9A//SBDS//EGF//IGF1//IL1B  
3//CDK11A//FAM83D//KLHL21//NPM1//RAD51//MND1//SYCP2//UBR2//CYLD//UBE2S//CTNNB1//NAE1//WNT9A//SI  
S//EGF//IGF1//IL1B

'KLHL21//DLGAP5//SYCP2//ABI1//WASL//EYA2//KDM2A//JMJD6//SUZ12//ING3//ENY2//HIRA//MORF4L2//CCL26//I

VIP1//NPLOC4//ABCD3//RAB22A//PARD6B//UBE2C//CKS2//KIF11//AURKA//RAD51C//USP16//CDCA2//DYNC1LI1  
M5//YWHAZ//CTNNB1//MST4//STK24//RAB3A//STMN1//BNIP1//NPLOC4//ABCD3//RAB22A//PARD6B//UBE2C//Cf



/ASL//REPS2//TOMM5//YWHAZ//RABGEF1//EPN1//NME1//RAB22A//RAB5A//CDC42SE2//MST4//STK24//NPLOC4

//MRPL12//RPL27A//RPL23//GCH1//MDM2//PARD6B//WASL//REPS2//TOMM5//YWHAZ//RABGEF1//EPN1//NME1//

2G4C//IFNG//IL1B//PAPD5//HP

//FOXL2//CCDC85B//EZH2//HMGB2//AKIRIN2//SMURF2//HIRA//EIF4A3//HMGXB4//WWOX//TPM1//SMURF1//TWIS1

B//PBK//EIF2AK2//TEX14//STK3//AURKA//AURKC//BUB1//CDK11A//STK24//CCNE1//AKT1S1//PPM1K//PPM1A//P

1//CAMKK2//MAP3K3//DCP2//NCBP2//UPF3B//EIF4A3//TGFBR1//IL1B//SOD1//SPRED2//FBXW11//UBR5//SMURF

//FOXL2//ADNP//TBK1//CCDC85B//EZH2//HMGB2//AKIRIN2//SMURF2//HIRA//EIF4A3//HMGXB4//WWOX//SMURF

2B//TNNI3//TPM1//CCL26//DAB2IP//HBB//DHDH//PCNP//IGF1//IL1B//IFNG//PAPD5//HP  
R1//SUN1

A7//PSMB5//PSMC5//PSMD9//PSMD11//PSMD12//PSME1//GCLM//NDUFB4//CRKL//DAB2IP//HSPB8//DNAJA4//H

.T4//JMJD6//DCN//NAE1//UBQLN1//NLRP12//ISG15//STRADA//IFNG//ESCO2//DUSP14//UBE2S//UBE2T//IGF1//TF

4//HSPA1B//HSP90AA1//EIF5A2//FEM1B//DCAF7//MARCH6//UBE2C//DCAF4//TRIM23//ANAPC11//PCNP//SKP1//L

JMJD6//DCN//NAE1//UBQLN1//NLRP12//ISG15//STRADA//IFNG//ESCO2//DUSP14//UBE2T//IGF1//TPD52L1//UBE

BK1//MAP3K3//ZDHHC13//BST2//BPTF//FBXW11//HNRNPAB//NCF2//HSP90AA1//CCNE1//JUND//H2AFX//TPM1//

/HSP90AA1//EIF5A2//FEM1B//DCAF7//MARCH6//UBE2C//DCAF4//TRIM23//ANAPC11//PCNP//SKP1//UBE2D2//KL

=2AK2//TEX14//STK3//AURKA//AURKC//BUB1//CDK11A//STK24//CCNE1//AKT1S1//PPM1K//PPM1A//PPP3CA//PT

PSMD9//SLC30A7//CA2//ADNP//RPS24//CRABP2//CCNB2//HMGB2//NCF2//AKT1S1//SIRT4//JMJD6//BPGM//FOXO

38A//STRA13//RDM1//EYA2//UBE2T//NPM1//BCCIP//RAD51C//UBE2D3//PTTG1//MORF4L2//SOD1//BAZ1B//TRIP11

1G3//STK3//TOP2A//EEF1E1//MAP3K3//ZDHHC13//BST2//BPTF//HNRNPAB//NCF2//HSP90AA1//CCNE1//JUND//H

//PRKACB//AQP10//HSP90AA1//PCNA//RIMS2//HSPA8//RABGEF1//EPN1//NME1//RAB22A//RAB5A//CDC42SE2//

NA//RIMS2//HSPA8//RABGEF1//EPN1//NME1//RAB22A//RAB5A//CDC42SE2//DLGAP5//KIF18A//CCNB1//TOB1//R,

B//HP//HMGB2//FOXD4L1//FOXD4//FOXD2//FOXD4L3//S100A16//TGFBR1//CMPK2//RRAGB//RRAGC//WNT9A//E

CDC88A//STRA13//RDM1//EYA2//UBE2T//NPM1//BCCIP//RAD51C//UBE2D3//PTTG1//MORF4L2//BAZ1B//TRIP13

/HNRNPAB//MYC//HIRA//PQBP1//HOXB13//NFAT5//ZNF813//CRABP2//ZNF534//ZNF483//ZFP1//EZH2//ADNP//FC

/EIF5A2//FEM1B//DCAF7//MARCH6//UBE2C//DCAF4//TRIM23//ANAPC11//PCNP//SKP1//UBE2D2//KLHL21//PTTG

1C//SLC16A1//TFPI//TFPI2//CALU//KIF18A//CD9//KIF23//CYLD//FBXW11//PPM1A//WNT9A//RRAGB//LRRN2//BAI1



BDS//PLA2G16//RHOB//EGF//IGF1//IL1B//BTG3//FEM1B//ESCO2//SENP5//ERH//FBXW11//CKAP2//MKI67//PCNP,

MYC//NDUFAF4//LETM1//SBDS//POLE4//HSP90AA1//EGF//IGF1//IL1B//SOD1//CYLD//SUN1

//ANAPC11//TXNL4B//HAUS2//PBK//PAPD5//DYNLT3//CDK11A//FAM83D//CCNB2//KLHL21//DLGAP5//SYCP2//BA  
<S2//KIF11//AURKA//RAD51C//USP16//CDCA2//DYNC1L1//ANAPC11//TXNL4B//HAUS2//PBK//PAPD5//DYNLT3//C

4//RAB3A//STMN1//BNIP1//ABCD3//UBE2C//CKS2//KIF11//AURKA//RAD51C//USP16//CDCA2//DYNC1L1//ANAPC

'RAB22A//RAB5A//CDC42SE2//MST4//STK24//NPLOC4//RAB3A//STMN1//BNIP1//ABCD3//UBE2C//CKS2//KIF11//

SG1//STMN1//NAE1//AKT1S1//FBXW11//STAG2//EGF//GRB2//EPN1//CYLD//SOCS1//VEGFA//C9ORF89//SBDS//A

PP3CA//PTPN1//PPM1D//CDC14A//SIRT4//TPST1//ST6GALNAC2//DPM1//MAN2A1//POMT1//PSMA8//PSMA3//P

1//UBE2D3//ISG15//HERC6//SMURF2//CCDC88A//TRIP13//SRSF10//SMN2//SNRPD1//SNRPD2//AURKA//LSM3//

1//TPM1//TWSG1//NCBP2//STMN1//NAE1//AKT1S1//CYLD//UBE2D3//ATG12//ISG15//FBXW11//STAG2//EGF//GR

OXB13//PLSCR1//EIF2AK2//GCH1//TPM1//DCN//CCNB1//SSTR2//EEF1E1//CD55//AKIRIN2//BST2//LAG3//SDCBF

'D52L1//UBE2G2//POLE4//ING3//MAP3K3//NEK2//VEGFA//MAD2L1//PSMA3//PSMA6//PSMA7//PSMB5//PSMC5//F

JBE2D2//KLHL21//ALDOC//GAPDHS//PRKACB//TPI1//MAN2A1//SLC16A1//COX17//COX6A1//COX6C//SDS//BPGI

:2G2//POLE4//ING3//MAP3K3//NEK2//VEGFA//MAD2L1//PSMA3//PSMA6//PSMA7//PSMB5//PSMC5//PSMD9//PSM

'GAPDHS//NUSAP1//DLGAP5//WNT9A//USP16//ENY2//MRPL12//PQBP1//CAMKK2//SMAD5//MAX//MYBL1//NPM1

.HL21//PTTG2//RNASEH1//HMGB2//ESCO2//STRA13//RDM1//EYA2//UBE2T//NPM1//RAD51C//PTTG1//MORF4L2

PN1//PPM1D//CDC14A//SIRT4//TPST1//ST6GALNAC2//DPM1//MAN2A1//POMT1//CPA3//SENP5//ANPEP//HP//FA

D4L1//FOXD4//FOXD2//FOXD4L3//PDSS2//GCLM//IFI6//CCNB1//SUN1

13//CYCS//FOXL2//TPD52L1//MND1//SIRT4//TRAPPC2//FOXD4//FOXD2//GABPB1//HNRNPAB//MYC//HIRA//PQBI

12AFX//RHOB//GAPDHS//NUSAP1//DLGAP5//WNT9A//USP16//ENY2//MRPL12//PQBP1//CAMKK2//SMAD5//MAX/

CTNNB1//DLGAP5//KIF18A//CCNB1//TOB1//RAB3A//NFAT5//CDO1//SYT9//IL1B//SLC2A1//KIF1B//HMGXB4//RHO

AB3A//NFAT5//CDO1//SYT9//IL1B//SLC2A1//KIF1B//HMGXB4//RHOB//NLRP12//CENPF//RAB31//SNF8//CHMP4B/

AB2IP//INHBA//PRKACB//MPP1

//CYCS//FOXL2//TPD52L1//MND1//SIRT4//TRAPPC2//FOXD4//FOXD2//GABPB1//HNRNPAB//MYC//HIRA//PQBP1

XD4L3//TFAP2E//ZNF860//SMAD5//MYBL1//ZNF331//ZNF287//CDK11A//ZNF382//CHD1//SNF8//ASCL4//JUND//S

;2//RNASEH1//HMGB2//ESCO2//STRA13//RDM1//EYA2//UBE2T//NPM1//RAD51C//PTTG1//MORF4L2//BAZ1B//TR



AP2//CAP2//NFAT5//NMU//FGL2//TAGAP//RHEBL1//CRABP2//CRH//GRP//HNRNPK//HSP90AA1//SP110//IMPA1//E

//AURKC//PARD6B//CDC14A

\\IAP2//GRB2//HSP90AA1//ITGA2B//KAL1//RHOB//WASL//ABI1//ADNP//UBE2S//EYA2//KDM2A//JMJD6//SUZ12//IN  
CDK11A//FAM83D//CCNB2//KLHL21//DLGAP5//SYCP2//BAIAP2//GRB2//HSP90AA1//ITGA2B//KAL1//RHOB//WASI

;11//TXNL4B//HAUS2//PBK//PAPD5//DYNLT3//FAM83D//CCNB2//KLHL21//DLGAP5//SYCP2//CD9//BAIAP2//GRB2

AURKA//RAD51C//USP16//CDCA2//DYNC1LI1//ANAPC11//TXNL4B//HAUS2//PBK//PAPD5//DYNLT3//FAM83D//CC

\DNP//GCLM//LAG3//PLA2G16//RHOB//TGFB1//HNRNPAB//PTPN1//SRSF10//DPH3//TOP2A//CASC5//CTHRC1/

3MA6//PSMA7//PSMB5//USP16//UBR2//PSMD9//UBE2G2//USP13//UBE2W//DAB2IP//GH1//ADNP//SBDS//EIF4A3/

BCAS2//HNRNPM//SYNCRIP//HNRNPA1//HNRNPH3//HNRNPK//U2AF1//SRSF9//GTF2H3//RAD51AP1//RAD51//C

3B2//EPN1//CRH//SOCS1//VEGFA//C9ORF89//SBDS//GCLM//LAG3//PLA2G16//RHOB//TGFB1//HNRNPAB//PTP

3//TPD52L1//B2M//NLRP12//RSAD2//IFNG//OAS1//OAS2//SOCS1//IFI6//IFI27//IFI35//ISG15//STC1//STC2//FEM1B/

PSMD9//PSMD11//PSMD12//PSME1//PSMA8//CYLD

M//IDH3A//SLC2A1//NDUFA8//NDUFB2//NDUFB4//NDUFB9//NDUFS6//ATP5G1//CYCS//UQCRB//COX7A2L//GCH

ID11//PSMD12//PSME1//PSMA8//CYLD

I//ZFX//MED30//ZFPM2//TFAP2E//LAG3//PRTFDC1//NCBP2//GTF2H3//NME1//PANX1//RAD51//STMN1//ANAPC11

!!BAZ1B//TRIP13//CYCS//FOX L2//TPD52L1//MND1//SIRT4//TRAPPC2//RRAGC//FOX D4//FOX D2//GABPB1//HNRI

\M108B1//NRIP3//PSMA8//PSMA3//PSMA6//PSMA7//PSMB5//USP16//UBR2//PSMD9//UBE2G2//USP13//UBE2W//

P1//HOXB13//NFAT5//ZNF813//CRABP2//ZNF534//ZNF483//ZFP1//EZH2//ADNP//FOXD4L3//TFAP2E//ZNF860//SM

/MYBL1//NPM1//ZFX//MED30//ZFPM2//TFAP2E//LAG3//PRTFDC1//NCBP2//GTF2H3//NME1//PANX1//RAD51//STM

B//TGFB1//NLRP12//SGOL1//CASC5//DAB2IP//CENPF//RAB31//SNF8//CHMP4B//CHCHD4//RAB40AL//RAB37//

/CHCHD4//VPS13B//RAB40AL//RAB37//SERP2//SDAD1//EIF5A2//RAB7L1//CHMP4C//RAB33A//SLC16A1//GH1//V



//HOXB13//NFAT5//ZNF813//CRABP2//ZNF534//ZNF483//ZFP1//EZH2//ADNP//FOXD4L3//TFAP2E//ZNF860//SMA

OD2//MED10//SBDS//RPS7//RPS15//RPS24//UTP23//CCRN4L//MAX//PSMC5//PIR//MED30//MRPL12//ZFC3H1//M

!IP13//CYCS//FOXL2//TPD52L1//MND1//SIRT4//TRAPPC2//RRAGC//FOXD4//FOXD2//GABPB1//HNRNPAB//MYC/

STMN1//SMAD5//MPP1//NPM1//ZDHHC13//CCL7//STK3//BST2//TNFAIP6//STK24//NAE1//ARHGAP11B//ANGPTL1

G3//ENY2//HIRA//MORF4L2//POSTN//LUM//TGFB1//VMO1//CCL26//CD9//MYC//NDUFAF4//PVRL3//LIMS1//BBF  
L//ABI1//ADNP//UBE2S//EYA2//KDM2A//JMJD6//SUZ12//ING3//ENY2//HIRA//MORF4L2//POSTN//LUM//TGFB1//V

//HSP90AA1//ITGA2B//KAL1//RHOB//ABI1//PLSCR1//DAB2IP//ADNP//UBE2S//HSPA8//EYA2//KDM2A//JMJD6//SU

;NB2//KLHL21//DLGAP5//SYCP2//CD9//BAIAP2//GRB2//HSP90AA1//ITGA2B//KAL1//RHOB//ABI1//PLSCR1//DAB2

/STK3//DYNC1LI1//HP

//EZH2//SUZ12//BAZ1B//EYA2//ENY2//DPH3//ABI1//MAGT1//B4GALT4//JMJD6//DCN//NAE1//NPLOC4//MAD2L1//F

AP2//NOX4//AURKC//KLHL21//RRAGC//CDK11A//MORF4L2//TNNT3//VEGFA//WWOX//FOXD4L1//FOXD4//FOXD

N1//SRSF10//DPH3//TOP2A//CASC5//CTHRC1//STK3//DYNC1LI1//HP

/NMU//CA2

1//ERH//OAS1//OAS2//NME1//PRTFDC1//NPPC//RAB31//NKIRAS1//RHOB//RAB22A//RAB3A//RAB5A//RRAGC//R

//SKP1//UBE2S//PPBP

NPAB//MYC//HIRA//PQBP1//HOXB13//NFAT5//ZNF813//CRABP2//ZNF534//ZNF483//ZFP1//EZH2//ADNP//FOXD4L

'CD55//DAB2IP//TFPI//GH1//ADNP//SBDS//EIF4A3//EZH2//SUZ12//BAZ1B//EYA2//ENY2//DPH3//ABI1//MAGT1//B4

IAD5//MYBL1//ZNF331//ZNF287//CDK11A//ZNF382//CHD1//SNF8//ASCL4//JUND//SOD2//MED10//SBDS//RPS7//R

AN1//ANAPC11//SKP1//UBE2S//PPBP//MAD2L1//DYNC1L1



'SERP2//SDAD1//EIF5A2//RAB7L1//CHMP4C//RAB33A//SLC16A1//GH1//VDAC3//ABCD3//ARPP19//CTHRC

/DAC3//ABCD3//ARPP19//INHBA//GAL//FAM3B//GRB2//PSMD9//UBR5//DAB2IP//NUSAP1//CYLD//FBXW11//JMJC

D5//MYBL1//ZNF331//ZNF287//CDK11A//ZNF382//CHD1//SNF8//ASCL4//JUND//SOD2//MED10//SBDS//RPS7//RP:

/BP4//SNRNP48//JMJD6//SREK1IP1//TXNL4B//HSPA1B//EEF1E1//INHBA//DAB2IP//IL1B//FOXD4L1//IFNG//WNT9

/HIRA//PQBP1//HOXB13//NFAT5//ZNF813//CRABP2//ZNF534//ZNF483//ZFP1//EZH2//ADNP//FOXD4L3//TFAP2E//

//NLRP12//SH3BP5//GDF15//ARHGAP25//ABI1//CRKL//MAGI3//WSB1//SDCBP//PLA2G4C//ESCO2//SIRT4//BAZ1I

31//LETM1//SBDS//POMP//PSMG1//POLE  
/MO1//CCL26//CD9//MYC//NDUFAF4//PVRL3//LIMS1//SDAD1/

Z12//ING3/

IP//ADNP//UBE2S//HSPA8//EYA2

'SMC5//PSMD11//PSMD12//

2//FOXD4L

AB7L1//RAB33A//KIF1B//

.3//TFAP2E//ZNF860//SMAD5//MYB

GALT4//JMJD



!PS15//RPS24//UTP23//CCRN4L//MAX//PIR//MED30//MRPL12//ZFC3H1//W

06//SEC61G//

S15//RPS24//UTP23//CCRN4L//MAX//PI

IA//PSMA8//HSPA8//PSMA3//

ZNF860//SMAD5//MYBL

B//PQ
