# Supplementary material for: LncRNAs as new biomarkers to differentiate triple negative breast cancer from non-triple negative breast cancer
Source: PubMed Central journal article supplement (PMC4914340; doi:10.18632/oncotarget.7509), 2016-02-19
Supplement: oncotarget-07-13047-s002.pdf [file oncotarget-07-13047-s002.pdf]

#Column "GO.ID" stands for the ID of gene ontology term  
 #Column "Term" stands for the name of gene ontology term  
 #Column "Ontology" stands for the ontology of GOID belongs to  
 #Column "Count" stands for the number of DE genes associated with the listed GOID  
 #Column "Pop.Hits" stands for the number of background population genes associated with the  
 #Column "List.Total" stands for the total number of DE genes  
 #Column "Pop.Total" stands for the total number of background population genes  
 #Column "Fold.Enrichment" stands for the Fold Enrichment value of the GOID, it equals (Count  
 #Column "Pvalue" stands for the significance testing value of the GOID  
 #Column "FDR" stands for the false discovery rate of the GOID, using Benjamini & Hochberg  
 #Column "Enrichment.Score" stands for the Enrichment Score value of the GOID, it equals (-log  
 #Column "GENES" stands for the DE genes associated with the GOID

| GO.ID      | Term                                  | Ontology           | Count | Pop.Hits |
|------------|---------------------------------------|--------------------|-------|----------|
| GO:0044459 | plasma membrane part                  | Cellular component | 80    | 2120     |
| GO:0030054 | cell junction                         | Cellular component | 29    | 590      |
| GO:0005856 | cytoskeleton                          | Cellular component | 58    | 1500     |
| GO:0005795 | Golgi stack                           | Cellular component | 9     | 107      |
| GO:0031252 | cell leading edge                     | Cellular component | 12    | 181      |
| GO:0005938 | cell cortex                           | Cellular component | 10    | 136      |
| GO:0014069 | postsynaptic density                  | Cellular component | 7     | 83       |
| GO:0031256 | leading edge membrane                 | Cellular component | 6     | 63       |
| GO:0030027 | lamellipodium                         | Cellular component | 7     | 84       |
| GO:0031253 | cell projection membrane              | Cellular component | 9     | 129      |
| GO:0016514 | SWI/SNF complex                       | Cellular component | 3     | 15       |
| GO:0005911 | cell-cell junction                    | Cellular component | 12    | 209      |
| GO:0015629 | actin cytoskeleton                    | Cellular component | 15    | 297      |
| GO:0071944 | cell periphery                        | Cellular component | 125   | 4101     |
| GO:0070603 | SWI/SNF-type complex                  | Cellular component | 3     | 21       |
| GO:0031985 | Golgi cisterna                        | Cellular component | 6     | 81       |
| GO:0005891 | voltage-gated calcium channel complex | Cellular component | 3     | 22       |
| GO:0030864 | cortical actin cytoskeleton           | Cellular component | 3     | 22       |
| GO:0031984 | organelle subcompartment              | Cellular component | 6     | 83       |
| GO:0005622 | intracellular                         | Cellular component | 317   | 11619    |
| GO:0042581 | specific granule                      | Cellular component | 2     | 10       |
| GO:0017053 | transcriptional repressor complex     | Cellular component | 4     | 45       |
| GO:0034703 | cation channel complex                | Cellular component | 8     | 140      |
| GO:0031012 | extracellular matrix                  | Cellular component | 16    | 371      |
| GO:0071564 | npBAF complex                         | Cellular component | 2     | 11       |
| GO:0044463 | cell projection part                  | Cellular component | 17    | 404      |
| GO:0032580 | Golgi cisterna membrane               | Cellular component | 5     | 69       |
| GO:0009897 | external side of plasma membrane      | Cellular component | 8     | 144      |
| GO:0009986 | cell surface                          | Cellular component | 16    | 375      |
| GO:0070161 | anchoring junction                    | Cellular component | 9     | 172      |
| GO:0005886 | plasma membrane                       | Cellular component | 120   | 4043     |
| GO:0071565 | nBAF complex                          | Cellular component | 2     | 12       |
| GO:0043197 | dendritic spine                       | Cellular component | 4     | 50       |
| GO:0044424 | intracellular part                    | Cellular component | 307   | 11322    |

|            |                                          |                    |    |     |
|------------|------------------------------------------|--------------------|----|-----|
| GO:0034704 | calcium channel complex                  | Cellular component | 3  | 30  |
| GO:0044462 | external encapsulating structure part    | Cellular component | 2  | 13  |
| GO:0031227 | intrinsic to endoplasmic reticulum membr | Cellular component | 5  | 75  |
| GO:0042995 | cell projection                          | Cellular component | 30 | 844 |
| GO:0005912 | adherens junction                        | Cellular component | 8  | 154 |
| GO:0044309 | neuron spine                             | Cellular component | 4  | 53  |
| GO:0000228 | nuclear chromosome                       | Cellular component | 10 | 212 |
| GO:0005777 | peroxisome                               | Cellular component | 6  | 102 |
| GO:0005925 | focal adhesion                           | Cellular component | 6  | 102 |
| GO:0042579 | microbody                                | Cellular component | 6  | 102 |
| GO:0030312 | external encapsulating structure         | Cellular component | 2  | 14  |

listed GOID

t/Pop.Hits)/(List.Total/Pop.Total)

(1995) method

g10(Pvalue))

| List.Total | Pop.Total | Fold.Enrichment | Pvalue      | FDR         | Enrichment.Score |
|------------|-----------|-----------------|-------------|-------------|------------------|
| 425        | 16589     | 1.472941176     | 0.000212452 | 0.11026244  | 3.672739759      |
| 425        | 16589     | 1.918568295     | 0.000641602 | 0.166495729 | 3.192734266      |
| 425        | 16589     | 1.509273725     | 0.00099647  | 0.17238937  | 3.001535622      |
| 425        | 16589     | 3.283144585     | 0.001711756 | 0.222100397 | 2.766558033      |
| 425        | 16589     | 2.587819305     | 0.002484639 | 0.229079028 | 2.604736789      |
| 425        | 16589     | 2.870069204     | 0.002648312 | 0.229079028 | 2.577030777      |
| 425        | 16589     | 3.291934798     | 0.005378225 | 0.284968562 | 2.269361064      |
| 425        | 16589     | 3.717422969     | 0.005412828 | 0.284968562 | 2.266575754      |
| 425        | 16589     | 3.252745098     | 0.005741343 | 0.284968562 | 2.240986503      |
| 425        | 16589     | 2.723228454     | 0.005995696 | 0.284968562 | 2.222160398      |
| 425        | 16589     | 7.806588235     | 0.006039796 | 0.284968562 | 2.218977722      |
| 425        | 16589     | 2.241125809     | 0.007782532 | 0.336594517 | 2.108879074      |
| 425        | 16589     | 1.971360665     | 0.009890217 | 0.394847906 | 2.004794167      |
| 425        | 16589     | 1.189738514     | 0.014564109 | 0.516415333 | 1.836716088      |
| 425        | 16589     | 5.576134454     | 0.015761777 | 0.516415333 | 1.802394823      |
| 425        | 16589     | 2.891328976     | 0.017652464 | 0.516415333 | 1.753194657      |
| 425        | 16589     | 5.322673797     | 0.017910358 | 0.516415333 | 1.746895724      |
| 425        | 16589     | 5.322673797     | 0.017910358 | 0.516415333 | 1.746895724      |
| 425        | 16589     | 2.821658398     | 0.019682838 | 0.532709744 | 1.705912291      |
| 425        | 16589     | 1.06493178      | 0.020528314 | 0.532709744 | 1.687646721      |
| 425        | 16589     | 7.806588235     | 0.02571729  | 0.553759957 | 1.589774804      |
| 425        | 16589     | 3.469594771     | 0.027703703 | 0.553759957 | 1.557462182      |
| 425        | 16589     | 2.230453782     | 0.027805654 | 0.553759957 | 1.555866892      |
| 425        | 16589     | 1.683361345     | 0.030143376 | 0.553759957 | 1.520808113      |
| 425        | 16589     | 7.096898396     | 0.030907021 | 0.553759957 | 1.509942857      |
| 425        | 16589     | 1.642475248     | 0.031777195 | 0.553759957 | 1.497884443      |
| 425        | 16589     | 2.828473998     | 0.031804464 | 0.553759957 | 1.497511916      |
| 425        | 16589     | 2.168496732     | 0.032131864 | 0.553759957 | 1.493064074      |
| 425        | 16589     | 1.66540549      | 0.032785651 | 0.553759957 | 1.484316188      |
| 425        | 16589     | 2.042421341     | 0.033316521 | 0.553759957 | 1.477340354      |
| 425        | 16589     | 1.158533995     | 0.035725762 | 0.553759957 | 1.447018496      |
| 425        | 16589     | 6.505490196     | 0.036470063 | 0.553759957 | 1.438063486      |
| 425        | 16589     | 3.122635294     | 0.038801885 | 0.553759957 | 1.411147181      |
| 425        | 16589     | 1.058391887     | 0.040180331 | 0.553759957 | 1.395986487      |

|     |       |             |             |             |             |
|-----|-------|-------------|-------------|-------------|-------------|
| 425 | 16589 | 3.903294118 | 0.040659839 | 0.553759957 | 1.390834342 |
| 425 | 16589 | 6.005067873 | 0.042383978 | 0.553759957 | 1.372798286 |
| 425 | 16589 | 2.602196078 | 0.043221557 | 0.553759957 | 1.364299593 |
| 425 | 16589 | 1.387426819 | 0.044036105 | 0.553759957 | 1.3561911   |
| 425 | 16589 | 2.027685256 | 0.044899716 | 0.553759957 | 1.347756407 |
| 425 | 16589 | 2.945882353 | 0.046514762 | 0.553759957 | 1.3324092   |
| 425 | 16589 | 1.841176471 | 0.046894291 | 0.553759957 | 1.328880027 |
| 425 | 16589 | 2.296055363 | 0.047174179 | 0.553759957 | 1.32629565  |
| 425 | 16589 | 2.296055363 | 0.047174179 | 0.553759957 | 1.32629565  |
| 425 | 16589 | 2.296055363 | 0.047174179 | 0.553759957 | 1.32629565  |
| 425 | 16589 | 5.576134454 | 0.048627226 | 0.553759957 | 1.313120501 |



|                                                                                           |  |  |  |  |  |  |
|-------------------------------------------------------------------------------------------|--|--|--|--|--|--|
| CACNA1C//CACNA1D//CACNB4                                                                  |  |  |  |  |  |  |
| GSTK1//AXIN1                                                                              |  |  |  |  |  |  |
| ASPH//ELOVL1//DERL3//FMO4//FMO5                                                           |  |  |  |  |  |  |
| AMOT//S100A11//INHA//SPAG6//MSN//C6ORF170//IFT122//CC2D2A//TRPV4//ADAM15//CTNND1//PLD1//S |  |  |  |  |  |  |
| SORBS3//ZNF384//ARHGAP26//SYNE2//FBLIM1//TRPV4//PTPRK//ADAM15                             |  |  |  |  |  |  |
| SYNPO//GABBR1//SIPA1L1//P2RX6                                                             |  |  |  |  |  |  |
| ADD3//REC8//NR1H3//DDX11//KDM4C//PCGF2//REPIN1//MCM7//PBRM1//SMARCB1                      |  |  |  |  |  |  |
| ACSL3//CROT//SCP2//SERHL2//GSTK1//KIAA0430                                                |  |  |  |  |  |  |
| SORBS3//ZNF384//ARHGAP26//SYNE2//FBLIM1//TRPV4                                            |  |  |  |  |  |  |
| ACSL3//SERHL2//GSTK1//CROT//SCP2//KIAA0430                                                |  |  |  |  |  |  |
| GSTK1//AXIN1                                                                              |  |  |  |  |  |  |







|  |  |  |  |  |  |  |  |  |  |
|--|--|--|--|--|--|--|--|--|--|
|  |  |  |  |  |  |  |  |  |  |
|  |  |  |  |  |  |  |  |  |  |
|  |  |  |  |  |  |  |  |  |  |
|  |  |  |  |  |  |  |  |  |  |
|  |  |  |  |  |  |  |  |  |  |
|  |  |  |  |  |  |  |  |  |  |
|  |  |  |  |  |  |  |  |  |  |
|  |  |  |  |  |  |  |  |  |  |
|  |  |  |  |  |  |  |  |  |  |
|  |  |  |  |  |  |  |  |  |  |
|  |  |  |  |  |  |  |  |  |  |

R//CEACAM1//TNFSF11//MARCO//CD1C//P2RX6//LPAR2//ITGA2//ITGA3//ATP1A1//CACNA1C//CACNA1C//PPPIR9A//RAPSN//SNTB1//TANC1//P2RX6  
/SYNPO//SIPA1L1//CACNA1C//TANC1//P2RX6//APBB3//VILL//CORO1B//MLPH//SORBS2//SCNN1A//MY

H1//LPAR3//ALPP//GABBR1//SIPA1L1//GPR110//STEAP1//GPR150//TMPRSS11E//GPR132//KCNIP2//HLA

DAM15//KRT5//KRT7//KRT8//AMOT//PCGF2//ADAM8//SPAG6//IDUA//PON2//TSPAN8//USP4//DHRS2//AC

R//CEACAM1//TNFSF11//MARCO//CD1C//P2RX6//LPAR2//ITGA2//ITGA3//ATP1A1//CACNA1C//CACNA1C//PPPIR9A//RAPSN//SNTB1//TANC1//P2RX6

DAM15//KRT5//KRT7//KRT8//AMOT//PCGF2//ADAM8//SPAG6//IDUA//PON2//TSPAN8//USP4//DHRS2//AC
