# Supplementary material for: LncRNAs as new biomarkers to differentiate triple negative breast cancer from non-triple negative breast cancer
Source: PubMed Central journal article supplement (PMC4914340; doi:10.18632/oncotarget.7509), 2016-02-19
Supplement: oncotarget-07-13047-s003.pdf [file oncotarget-07-13047-s003.pdf]

#Column "GO.ID" stands for the ID of gene ontology term  
 #Column "Term" stands for the name of gene ontology term  
 #Column "Ontology" stands for the ontology of GOID belongs to  
 #Column "Count" stands for the number of DE genes associated with the listed GOID  
 #Column "Pop.Hits" stands for the number of background population genes associated with the  
 #Column "List.Total" stands for the total number of DE genes  
 #Column "Pop.Total" stands for the total number of background population genes  
 #Column "Fold.Enrichment" stands for the Fold Enrichment value of the GOID, it equals (Count  
 #Column "Pvalue" stands for the significance testing value of the GOID  
 #Column "FDR" stands for the false discovery rate of the GOID, using Benjamini & Hochberg  
 #Column "Enrichment.Score" stands for the Enrichment Score value of the GOID, it equals (-log  
 #Column "GENES" stands for the DE genes associated with the GOID

| GO.ID      | Term                                         | Ontology           | Count | Pop.Hits |
|------------|----------------------------------------------|--------------------|-------|----------|
| GO:0008270 | zinc ion binding                             | Molecular function | 83    | 2016     |
| GO:0043169 | cation binding                               | Molecular function | 138   | 3884     |
| GO:0043167 | ion binding                                  | Molecular function | 138   | 3895     |
| GO:0046914 | transition metal ion binding                 | Molecular function | 89    | 2296     |
| GO:0046872 | metal ion binding                            | Molecular function | 134   | 3842     |
| GO:0005200 | structural constituent of cytoskeleton       | Molecular function | 8     | 73       |
| GO:0004180 | carboxypeptidase activity                    | Molecular function | 6     | 43       |
| GO:0008092 | cytoskeletal protein binding                 | Molecular function | 27    | 531      |
| GO:0008060 | ARF GTPase activator activity                | Molecular function | 5     | 32       |
| GO:0005096 | GTPase activator activity                    | Molecular function | 16    | 259      |
| GO:0050660 | flavin adenine dinucleotide binding          | Molecular function | 7     | 71       |
| GO:0004181 | metallocarboxypeptidase activity             | Molecular function | 4     | 25       |
| GO:0003779 | actin binding                                | Molecular function | 17    | 325      |
| GO:0003995 | acyl-CoA dehydrogenase activity              | Molecular function | 3     | 16       |
| GO:0070011 | peptidase activity, acting on L-amino acid   | Molecular function | 25    | 557      |
| GO:0048037 | cofactor binding                             | Molecular function | 14    | 257      |
| GO:0008237 | metallopeptidase activity                    | Molecular function | 11    | 182      |
| GO:0016798 | hydrolase activity, acting on glycosyl bond  | Molecular function | 8     | 113      |
| GO:0030695 | GTPase regulator activity                    | Molecular function | 21    | 456      |
| GO:0008233 | peptidase activity                           | Molecular function | 25    | 576      |
| GO:0051015 | actin filament binding                       | Molecular function | 5     | 54       |
| GO:0004190 | aspartic-type endopeptidase activity         | Molecular function | 3     | 20       |
| GO:0070001 | aspartic-type peptidase activity             | Molecular function | 3     | 20       |
| GO:0008289 | lipid binding                                | Molecular function | 20    | 439      |
| GO:0060589 | nucleoside-triphosphatase regulator activity | Molecular function | 21    | 468      |
| GO:0005488 | binding                                      | Molecular function | 343   | 11951    |
| GO:0033293 | monocarboxylic acid binding                  | Molecular function | 5     | 58       |
| GO:0008093 | cytoskeletal adaptor activity                | Molecular function | 3     | 22       |
| GO:0005504 | fatty acid binding                           | Molecular function | 4     | 39       |
| GO:0008235 | metalloexopeptidase activity                 | Molecular function | 4     | 39       |
| GO:0008047 | enzyme activator activity                    | Molecular function | 18    | 392      |
| GO:0019902 | phosphatase binding                          | Molecular function | 5     | 60       |
| GO:0060090 | binding, bridging                            | Molecular function | 8     | 130      |
| GO:0050662 | coenzyme binding                             | Molecular function | 10    | 181      |

|            |                                            |                    |    |     |
|------------|--------------------------------------------|--------------------|----|-----|
| GO:0001786 | phosphatidylserine binding                 | Molecular function | 2  | 10  |
| GO:0004953 | icosanoid receptor activity                | Molecular function | 2  | 10  |
| GO:0004954 | prostanoid receptor activity               | Molecular function | 2  | 10  |
| GO:0005391 | sodium:potassium-exchanging ATPase ac      | Molecular function | 2  | 10  |
| GO:0008271 | secondary active sulfate transmembrane tr  | Molecular function | 2  | 10  |
| GO:0050431 | transforming growth factor beta binding    | Molecular function | 2  | 10  |
| GO:0005083 | small GTPase regulator activity            | Molecular function | 14 | 292 |
| GO:0017124 | SH3 domain binding                         | Molecular function | 7  | 112 |
| GO:0004553 | hydrolase activity, hydrolyzing O-glycosy  | Molecular function | 6  | 89  |
| GO:0016291 | acyl-CoA thioesterase activity             | Molecular function | 2  | 11  |
| GO:0046875 | ephrin receptor binding                    | Molecular function | 2  | 11  |
| GO:0005245 | voltage-gated calcium channel activity     | Molecular function | 3  | 27  |
| GO:0008238 | exopeptidase activity                      | Molecular function | 6  | 92  |
| GO:0016877 | ligase activity, forming carbon-sulfur bon | Molecular function | 3  | 28  |
| GO:0001619 | lysosphingolipid and lysophosphatidic aci  | Molecular function | 2  | 12  |
| GO:0008556 | potassium-transporting ATPase activity     | Molecular function | 2  | 12  |
| GO:0015645 | fatty acid ligase activity                 | Molecular function | 2  | 12  |
| GO:0016846 | carbon-sulfur lyase activity               | Molecular function | 2  | 12  |
| GO:0045125 | bioactive lipid receptor activity          | Molecular function | 2  | 12  |
| GO:0051721 | protein phosphatase 2A binding             | Molecular function | 2  | 12  |
| GO:0017016 | Ras GTPase binding                         | Molecular function | 6  | 94  |
| GO:0015116 | sulfate transmembrane transporter activity | Molecular function | 2  | 13  |
| GO:0003707 | steroid hormone receptor activity          | Molecular function | 4  | 51  |

listed GOID

t/Pop.Hits)/(List.Total/Pop.Total)

(1995) method

g10(Pvalue))

| List.Total | Pop.Total | Fold.Enrichment | Pvalue      | FDR         | Enrichment.Score |
|------------|-----------|-----------------|-------------|-------------|------------------|
| 416        | 15273     | 1.511536315     | 6.23223E-05 | 0.055155192 | 4.205356873      |
| 416        | 15273     | 1.30446036      | 0.000209347 | 0.060654004 | 3.679133382      |
| 416        | 15273     | 1.30077639      | 0.000239043 | 0.060654004 | 3.621523809      |
| 416        | 15273     | 1.423144976     | 0.000274142 | 0.060654004 | 3.562023803      |
| 416        | 15273     | 1.280496686     | 0.000622632 | 0.110205913 | 3.20576837       |
| 416        | 15273     | 4.023445732     | 0.000809962 | 0.119469366 | 3.09153546       |
| 416        | 15273     | 5.122875671     | 0.001022636 | 0.129290443 | 2.990278807      |
| 416        | 15273     | 1.866810626     | 0.00143685  | 0.157948178 | 2.842588658      |
| 416        | 15273     | 5.736553486     | 0.001606253 | 0.157948178 | 2.79418614       |
| 416        | 15273     | 2.268042768     | 0.002021705 | 0.178920912 | 2.694282168      |
| 416        | 15273     | 3.619684453     | 0.003138936 | 0.252541656 | 2.503217562      |
| 416        | 15273     | 5.874230769     | 0.004359418 | 0.321507078 | 2.360571486      |
| 416        | 15273     | 1.920421598     | 0.007974154 | 0.542855851 | 2.098315395      |
| 416        | 15273     | 6.883864183     | 0.008627565 | 0.545385351 | 2.064111766      |
| 416        | 15273     | 1.647843012     | 0.010210986 | 0.58679125  | 1.990932331      |
| 416        | 15273     | 1.999981293     | 0.011001652 | 0.58679125  | 1.95854211       |
| 416        | 15273     | 2.218974535     | 0.011271696 | 0.58679125  | 1.94801072       |
| 416        | 15273     | 2.599217155     | 0.012086013 | 0.594228966 | 1.917716948      |
| 416        | 15273     | 1.690773659     | 0.013641328 | 0.620927403 | 1.865143349      |
| 416        | 15273     | 1.593487079     | 0.015008324 | 0.620927403 | 1.823667796      |
| 416        | 15273     | 3.399439103     | 0.015506413 | 0.620927403 | 1.809488665      |
| 416        | 15273     | 5.507091346     | 0.016207665 | 0.620927403 | 1.790279541      |
| 416        | 15273     | 5.507091346     | 0.016207665 | 0.620927403 | 1.790279541      |
| 416        | 15273     | 1.672616962     | 0.017593308 | 0.620927403 | 1.754652497      |
| 416        | 15273     | 1.647420488     | 0.01772402  | 0.620927403 | 1.751437769      |
| 416        | 15273     | 1.053709498     | 0.01855454  | 0.620927403 | 1.731549799      |
| 416        | 15273     | 3.164995027     | 0.020582963 | 0.620927403 | 1.686492114      |
| 416        | 15273     | 5.006446678     | 0.021036387 | 0.620927403 | 1.677028843      |
| 416        | 15273     | 3.765532544     | 0.021048387 | 0.620927403 | 1.676781189      |
| 416        | 15273     | 3.765532544     | 0.021048387 | 0.620927403 | 1.676781189      |
| 416        | 15273     | 1.68584429      | 0.021955632 | 0.62679788  | 1.658454058      |
| 416        | 15273     | 3.059495192     | 0.02348456  | 0.63678451  | 1.629217577      |
| 416        | 15273     | 2.259319527     | 0.025885151 | 0.63678451  | 1.586949304      |
| 416        | 15273     | 2.028394603     | 0.026664048 | 0.63678451  | 1.574073919      |

|     |       |             |             |             |             |
|-----|-------|-------------|-------------|-------------|-------------|
| 416 | 15273 | 7.342788462 | 0.028818644 | 0.63678451  | 1.540326451 |
| 416 | 15273 | 7.342788462 | 0.028818644 | 0.63678451  | 1.540326451 |
| 416 | 15273 | 7.342788462 | 0.028818644 | 0.63678451  | 1.540326451 |
| 416 | 15273 | 7.342788462 | 0.028818644 | 0.63678451  | 1.540326451 |
| 416 | 15273 | 7.342788462 | 0.028818644 | 0.63678451  | 1.540326451 |
| 416 | 15273 | 7.342788462 | 0.028818644 | 0.63678451  | 1.540326451 |
| 416 | 15273 | 1.760257508 | 0.029500751 | 0.63678451  | 1.530166923 |
| 416 | 15273 | 2.294621394 | 0.033427638 | 0.668379156 | 1.475894305 |
| 416 | 15273 | 2.475097234 | 0.034510622 | 0.668379156 | 1.462047218 |
| 416 | 15273 | 6.675262238 | 0.034597814 | 0.668379156 | 1.46095134  |
| 416 | 15273 | 6.675262238 | 0.034597814 | 0.668379156 | 1.46095134  |
| 416 | 15273 | 4.079326923 | 0.036173634 | 0.668379156 | 1.441607863 |
| 416 | 15273 | 2.394387542 | 0.039616653 | 0.668379156 | 1.402122219 |
| 416 | 15273 | 3.933636676 | 0.039720345 | 0.668379156 | 1.400986986 |
| 416 | 15273 | 6.118990385 | 0.040782457 | 0.668379156 | 1.389526613 |
| 416 | 15273 | 6.118990385 | 0.040782457 | 0.668379156 | 1.389526613 |
| 416 | 15273 | 6.118990385 | 0.040782457 | 0.668379156 | 1.389526613 |
| 416 | 15273 | 6.118990385 | 0.040782457 | 0.668379156 | 1.389526613 |
| 416 | 15273 | 6.118990385 | 0.040782457 | 0.668379156 | 1.389526613 |
| 416 | 15273 | 6.118990385 | 0.040782457 | 0.668379156 | 1.389526613 |
| 416 | 15273 | 2.343443126 | 0.043273346 | 0.696307471 | 1.363779526 |
| 416 | 15273 | 5.648298817 | 0.047346311 | 0.748240806 | 1.324713854 |
| 416 | 15273 | 2.879524887 | 0.049725447 | 0.772053    | 1.3034213   |

|                                                                                                                                                                                                                                                                                                                                                                                                                                                                                                                           |  |  |  |  |  |  |  |  |
|---------------------------------------------------------------------------------------------------------------------------------------------------------------------------------------------------------------------------------------------------------------------------------------------------------------------------------------------------------------------------------------------------------------------------------------------------------------------------------------------------------------------------|--|--|--|--|--|--|--|--|
|                                                                                                                                                                                                                                                                                                                                                                                                                                                                                                                           |  |  |  |  |  |  |  |  |
|                                                                                                                                                                                                                                                                                                                                                                                                                                                                                                                           |  |  |  |  |  |  |  |  |
|                                                                                                                                                                                                                                                                                                                                                                                                                                                                                                                           |  |  |  |  |  |  |  |  |
|                                                                                                                                                                                                                                                                                                                                                                                                                                                                                                                           |  |  |  |  |  |  |  |  |
|                                                                                                                                                                                                                                                                                                                                                                                                                                                                                                                           |  |  |  |  |  |  |  |  |
|                                                                                                                                                                                                                                                                                                                                                                                                                                                                                                                           |  |  |  |  |  |  |  |  |
|                                                                                                                                                                                                                                                                                                                                                                                                                                                                                                                           |  |  |  |  |  |  |  |  |
|                                                                                                                                                                                                                                                                                                                                                                                                                                                                                                                           |  |  |  |  |  |  |  |  |
|                                                                                                                                                                                                                                                                                                                                                                                                                                                                                                                           |  |  |  |  |  |  |  |  |
|                                                                                                                                                                                                                                                                                                                                                                                                                                                                                                                           |  |  |  |  |  |  |  |  |
|                                                                                                                                                                                                                                                                                                                                                                                                                                                                                                                           |  |  |  |  |  |  |  |  |
| GENES                                                                                                                                                                                                                                                                                                                                                                                                                                                                                                                     |  |  |  |  |  |  |  |  |
| ZNF737//NR1H3//ADAM8//PIAS3//ZNF266//ADAMTS8//PHF21B//ADAT3//AGAP1//CPXM2//CPO//CPB2//CPN1//PGM2//RPS6KA1//ADAM8//SCGN//DSG4//OIT3//AIF1//EFEMP1//SULF1//PCLO//KCNIP2//ASPH//PCDHA10//PGM2//RPS6KA1//ADAM8//SCGN//DSG4//OIT3//AIF1//EFEMP1//SULF1//PCLO//KCNIP2//ASPH//PCDHA10//STEAP1//NDOR1//CP//HAAO//ZNF737//NR1H3//ADAM8//PIAS3//ZNF266//ADAMTS8//PHF21B//ADAT3//AGAP1//PGM2//RPS6KA1//ADAM8//SCGN//DSG4//OIT3//AIF1//EFEMP1//SULF1//PCLO//KCNIP2//ASPH//PCDHA10//SORBS3//ADD3//KRT5//LOR//MSN//VILL//SPTBN4//SORBS2 |  |  |  |  |  |  |  |  |
| CPXM2//CPO//CPB2//CPN1//ACE//FOLH1                                                                                                                                                                                                                                                                                                                                                                                                                                                                                        |  |  |  |  |  |  |  |  |
| SYNPO//ADD3//ACE//SYNE2//MYBPC1//VILL//PPP1R9A//SPTBN4//TRPV4//SCNN1A//SNTB1//MLPH//CAPZ1//AGAP1//AGAP9//AGAP8//AGAP5//ASAP2                                                                                                                                                                                                                                                                                                                                                                                              |  |  |  |  |  |  |  |  |
| C6ORF170//TBC1D30//DAB2IP//ARHGAP26//AGAP1//AGAP9//AGAP8//AGAP5//ASAP2//PCP2//SH3BP1//SIP1//FMO4//FMO5//STEAP1//ACAD8//NDOR1//ACADM//ACADVL                                                                                                                                                                                                                                                                                                                                                                               |  |  |  |  |  |  |  |  |
| CPXM2//CPO//CPB2//CPN1                                                                                                                                                                                                                                                                                                                                                                                                                                                                                                    |  |  |  |  |  |  |  |  |
| EGFR//AIF1//CORO1B//TRPV4//SCIN//SYNPO//ADD3//ACE//SYNE2//MYBPC1//VILL//PPP1R9A//SPTBN4//SNTB1//ACADVL//ACADM//ACAD8                                                                                                                                                                                                                                                                                                                                                                                                      |  |  |  |  |  |  |  |  |
| CASP8//USP2//ELANE//TMPRSS11E//KLK15//RHBDF1//LONRF2//ACE//FOLH1//CPXM2//CPO//CPB2//CPN1//ACOT7//ACADVL//NDOR1//PDXDC1//TAT//CCBL1//OGDHL//NDUFS7//FMO4//FMO5//STEAP1//ACAD8//ACADM//CPXM2//CPO//CPB2//CPN1//ADAM8//ADAMTS8//ADAMTSL5//ADAM15//MYSM1//ACE//FOLH1                                                                                                                                                                                                                                                          |  |  |  |  |  |  |  |  |
| LYZL4//IDUA//NAGPA//GBA//GLB1L//CHI3L1//SMPDL3B//ATHL1                                                                                                                                                                                                                                                                                                                                                                                                                                                                    |  |  |  |  |  |  |  |  |
| SH2D3C//PCP2//BCR//MON2//ARHGAP26//SH3BP1//SIPA1L1//RAP1GAP//AXIN1//SYNGAP1//C6ORF170//THSD4//CASP8//USP2//ELANE//TMPRSS11E//KLK15//RHBDF1//LONRF2//ACE//FOLH1//CPXM2//CPO//CPB2//CPN1//EGFR//AIF1//CORO1B//TRPV4//SCIN                                                                                                                                                                                                                                                                                                   |  |  |  |  |  |  |  |  |
| SPPL2B//REN//NAPSA                                                                                                                                                                                                                                                                                                                                                                                                                                                                                                        |  |  |  |  |  |  |  |  |
| SPPL2B//REN//NAPSA                                                                                                                                                                                                                                                                                                                                                                                                                                                                                                        |  |  |  |  |  |  |  |  |
| ACOT7//ACADVL//THBS1//SCIN//CYP21A2//FABP6//LPAR3//PAFAH2//SYTL4//PCLO//NR1H3//AKR1C1//SCN7A3//SH2D3C//PCP2//BCR//MON2//ARHGAP26//SH3BP1//SIPA1L1//RAP1GAP//AXIN1//SYNGAP1//C6ORF170//THSD4//ACOT7//ACADVL//NOD1//STK25//DDX17//RASL10A//ADCY6//ACSM1//AGAP1//ABCC2//DAZL//DDX11//EGFR//AIF1//CORO1B//TRPV4//SCIN                                                                                                                                                                                                         |  |  |  |  |  |  |  |  |
| ACOT7//ACADVL//FABP6//AKR1C1//PPARG                                                                                                                                                                                                                                                                                                                                                                                                                                                                                       |  |  |  |  |  |  |  |  |
| ARHGAP26//OBSL1//SORBS2                                                                                                                                                                                                                                                                                                                                                                                                                                                                                                   |  |  |  |  |  |  |  |  |
| ACOT7//ACADVL//PPARG//FABP6                                                                                                                                                                                                                                                                                                                                                                                                                                                                                               |  |  |  |  |  |  |  |  |
| CPXM2//CPO//CPB2//CPN1                                                                                                                                                                                                                                                                                                                                                                                                                                                                                                    |  |  |  |  |  |  |  |  |
| PCP2//ARHGAP26//SH3BP1//SIPA1L1//RAP1GAP//BCR//AXIN1//SYNGAP1//C6ORF170//TBC1D30//DAB2IP//CTNND1//EGFR//PPME1//DAB2IP//SLC9A3R2                                                                                                                                                                                                                                                                                                                                                                                           |  |  |  |  |  |  |  |  |
| LOR//SH2D3C//RUSC1//MAPK8IP1//ARHGAP26//OBSL1//SORBS2//DAB2IP                                                                                                                                                                                                                                                                                                                                                                                                                                                             |  |  |  |  |  |  |  |  |
| ACOT7//ACADVL//NDOR1//OGDHL//FMO4//FMO5//STEAP1//ACAD8//ACADM//HPGD                                                                                                                                                                                                                                                                                                                                                                                                                                                       |  |  |  |  |  |  |  |  |

|                                                                                         |  |  |  |  |  |  |  |
|-----------------------------------------------------------------------------------------|--|--|--|--|--|--|--|
| THBS1//SCIN                                                                             |  |  |  |  |  |  |  |
| PPARG//HPGD                                                                             |  |  |  |  |  |  |  |
| PPARG//HPGD                                                                             |  |  |  |  |  |  |  |
| ATP1A1//ATP1B2                                                                          |  |  |  |  |  |  |  |
| SLC26A3//SLC26A6                                                                        |  |  |  |  |  |  |  |
| THBS1//LTBP4                                                                            |  |  |  |  |  |  |  |
| MON2//BCR//C6ORF170//TBC1D30//DAB2IP//ARHGAP26//AGAP1//AGAP9//AGAP8//AGAP5//ASAP2//MLPH |  |  |  |  |  |  |  |
| ZNF384//ARHGAP26//SH3BP1//PLSCR3//ADAM15//SYNGAP1//FAM125A                              |  |  |  |  |  |  |  |
| LYZL4//IDUA//NAGPA//GBA//CHI3L1//GLB1L                                                  |  |  |  |  |  |  |  |
| ACOT7//ACOT11                                                                           |  |  |  |  |  |  |  |
| EFNA4//EFNA5                                                                            |  |  |  |  |  |  |  |
| CACNB4//CACNA1C//CACNA1D                                                                |  |  |  |  |  |  |  |
| ACE//FOLH1//CPXM2//CPO//CPB2//CPN1                                                      |  |  |  |  |  |  |  |
| ACSM1//ACSL3//ACSM3                                                                     |  |  |  |  |  |  |  |
| LPAR3//LPAR2                                                                            |  |  |  |  |  |  |  |
| ATP1A1//ATP1B2                                                                          |  |  |  |  |  |  |  |
| ACSL3//ACSM1                                                                            |  |  |  |  |  |  |  |
| TAT//CCBL1                                                                              |  |  |  |  |  |  |  |
| LPAR3//LPAR2                                                                            |  |  |  |  |  |  |  |
| DAB2IP//PPME1                                                                           |  |  |  |  |  |  |  |
| RANBP3//KCTD13//MLPH//SYTL4//RPH3AL//RAP1GAP                                            |  |  |  |  |  |  |  |
| SLC26A3//SLC26A6                                                                        |  |  |  |  |  |  |  |
| NR1I3//NR1H3//PPARG//NR2F1                                                              |  |  |  |  |  |  |  |
